# Supplementary material for: Promoter-specific changes in initiation, elongation, and homeostasis of histone H3 acetylation during CBP/p300 inhibition
Source: eLife. 2021 Mar 11;10:e63512. doi: 10.7554/eLife.63512 (PMC8009678; doi:10.7554/eLife.63512)
Supplement: Figure 1—source data 1. [file elife-63512-fig1-data1.xlsx]

## Sheet: Figure 1b-source data 1
Figure 1b-source data 1	DM-E1A PI/wt E1A PI	Standard Deviation
E2	1.25687	0.423417
E4	1.19694	0.24817
E4	2.50292	0.87121
