# Supplementary material for: Promoter-specific changes in initiation, elongation, and homeostasis of histone H3 acetylation during CBP/p300 inhibition
Source: eLife. 2021 Mar 11;10:e63512. doi: 10.7554/eLife.63512 (PMC8009678; doi:10.7554/eLife.63512)
Supplement: Figure 3—source data 1. [file elife-63512-fig3-data1.xlsx]

## Sheet: Figure 3c-source data 1
Figure 3c-source data 1	pre-mRNA relative to DMSO
	DMSO	A-485
E2 pre-mRNA	1	0.496526	0.0104758
E3 pre-mRNA	1	0.811243	0.0504544
E4 pre-mRNA	1	0.42128	0.0143946
