# Supplementary material for: Promoter-specific changes in initiation, elongation, and homeostasis of histone H3 acetylation during CBP/p300 inhibition
Source: eLife. 2021 Mar 11;10:e63512. doi: 10.7554/eLife.63512 (PMC8009678; doi:10.7554/eLife.63512)
Supplement: Figure 4—source data 1. [file elife-63512-fig4-data1.xlsx]

## Sheet: Figure 4b-source data 1
Figure 4b-source data 1	Pausing Index
	DMSO	A-485
E2	0.13	0.12
E4	1.2	1.19
E4	0.79	1.13
