# Supplementary material for: Promoter-specific changes in initiation, elongation, and homeostasis of histone H3 acetylation during CBP/p300 inhibition
Source: eLife. 2021 Mar 11;10:e63512. doi: 10.7554/eLife.63512 (PMC8009678; doi:10.7554/eLife.63512)
Supplement: Figure 5—figure supplement 2—source data 1. [file elife-63512-fig5-figsupp2-data1.xlsx]

## Sheet: Figure 5- figure supplement 2, 
Figure 5- figure supplement 2, source data 1	Percentage of Peaks- Superenhancers
	H3K27ac	H3K18ac	H3K9ac	BRD4
DMSO	23.55	17.88	29.6	43.93
A-485	46.46	60.64	34.32	65.16
	Percentage of Peaks- Typical Enhancers
	H3K27ac	H3K18ac	H3K9ac	BRD4
DMSO	70.36	76.19	62.4	44.73
A-485	45.75	37.37	58.98	30.51
	Percentage of Peaks- Promoters
	H3K27ac	H3K18ac	H3K9ac	BRD4
DMSO	6.09	5.94	8	11.34
A-485	7.79	1.99	6.69	4.33
