# Supplementary material for: Promoter-specific changes in initiation, elongation, and homeostasis of histone H3 acetylation during CBP/p300 inhibition
Source: eLife. 2021 Mar 11;10:e63512. doi: 10.7554/eLife.63512 (PMC8009678; doi:10.7554/eLife.63512)
Supplement: Figure 5—figure supplement 2—source data 2. [file elife-63512-fig5-figsupp2-data2.xlsx]

## Sheet: Figure 5- figure supplement 2, 
Figure 5- figure supplement 2, source data 2		Total Peaks	Promoters	Typical Enhancers	Super-Enhancers
H3K27ac	DMSO	58832	13855	41393	3584
	A-485	30419	14132	13916	2371
		Total	Promoters	Typical Enhancers	Super-Enhancers
H3K18ac	DMSO	114823	20522	87483	6818
	A-485	27172	16476	10154	542
		Total	Promoters	Typical Enhancers	Super-Enhancers
H3K9ac	DMSO	59327	17559	37020	4748
	A-485	50320	17272	29681	3367
		Total	Promoters	Typical Enhancers	Super-Enhancers
BRD4	DMSO	26534	11657	11868	3009
	A-485	18896	12313	5765	818
