# Supplementary material for: Promoter-specific changes in initiation, elongation, and homeostasis of histone H3 acetylation during CBP/p300 inhibition
Source: eLife. 2021 Mar 11;10:e63512. doi: 10.7554/eLife.63512 (PMC8009678; doi:10.7554/eLife.63512)
Supplement: Figure 5—figure supplement 3—source data 1. [file elife-63512-fig5-figsupp3-data1.xlsx]

## Sheet: Sheet1
Category	Term	Count	%	PValue	Genes	List Total	Pop Hits	Pop Total	Fold Enrichment	Bonferroni	Benjamini	FDR
GOTERM_BP_DIRECT	GO:0000122~negative regulation of transcription from RNA polymerase II promoter	65	9.89346	8.73683e-12	CDKN1C, THRB, CITED2, FHL2, TFCP2L1, HMGB1, PRDM1, BACH1, ETS2, IRF2BPL, HEY1, FGF9, TRIM29, TGIF1, KLF10, EDN1, TSC22D3, OSR1, USP2, PEX2, DICER1, ARID1A, DKK1, AJUBA, FOXC2, NOTCH1, CTBP2, DDX20, NEDD4L, FOXO3, BARX2, FOXO1, HDAC7, RXRA, NFIL3, IFI16, DNAJB5, HES1, MSX1, RREB1, E2F7, E2F8, PLK3, SMAD3, VDR, ZBTB16, PHF12, CAV1, HMGA2, NR1D1, KLF4, HOPX, HIPK2, SMAD7, NR4A2, BMP2, KLF5, NFIA, ID…	594	720	16792	2.5521	2.97575e-08	1.81499e-08	1.77982e-08
GOTERM_MF_DIRECT	GO:0005515~protein binding	388	59.0563	1.20708e-11	PID1, SERPINE2, PWWP2B, RAPH1, FNBP1L, BACH1, ELK3, ZFYVE28, ALCAM, UBASH3B, ZC3H12A, NAMPT, CDK20, NFRKB, CCBE1, HPCAL1, RFX2, DICER1, DKK1, CTBP2, SHMT1, PDGFA, NEDD4L, KIAA0040, S100A13, KCNMB4, PPARGC1A, S100A11, ABCA1, PLK3, JUN, PHC2, JAG1, FZD4, PLK2, NR1D2, NR1D1, IL22RA1, VANGL1, SNAI2, CDKN1C, PYGB, CDKN1A, BTG1, TMEM51, STON2, SHB, TRIM8, HEY1, ADAMTSL4, IMPA2, TMSB4X, TIMP2, DUSP5, AN…	592	8785	16881	1.25941	1.04895e-08	1.04895e-08	1.01877e-08
GOTERM_BP_DIRECT	GO:0001525~angiogenesis	33	5.02283	1.39717e-11	LAMA5, COL18A1, NRP1, NRP2, CALCRL, EPAS1, NRXN3, PDGFA, TGFA, HIF3A, SHB, SAT1, ELK3, FGF9, HEY1, ZC3H12A, KDR, PTK2B, NRCAM, EPHB2, VAV3, JUN, JAG1, ANGPT1, ANXA2, CAV1, IL18, WNT7A, PGF, RHOB, KLF5, ID1, COL8A1	594	223	16792	4.18336	4.75877e-08	1.81499e-08	1.77982e-08
GOTERM_BP_DIRECT	GO:0008285~negative regulation of cell proliferation	45	6.84932	1.59864e-11	COL18A1, PTPRU, CDKN1A, IFITM1, NOTCH1, BTG1, B4GALT1, CTBP2, SERPINE2, DDX20, CXCL1, ETS1, NDRG1, PTHLH, ADAMTS1, RASSF5, RPS6KA2, FTH1, MXI1, TIMP2, PTK2B, IGFBP7, MSX1, E2F7, S100A11, KLF10, BCHE, JUN, VDR, ZBTB16, F2R, TSC2, WNT9A, KLF4, ALOX15B, BMP2, RGCC, CDK6, IL1B, CD9, SPRY1, IRF6, DFNA5, TLR2, TP73	594	396	16792	3.21243	5.44494e-08	1.81499e-08	1.77982e-08
GOTERM_BP_DIRECT	GO:0045944~positive regulation of transcription from RNA polymerase II promoter	76	11.5677	1.7665e-10	CSRNP1, EHF, THRB, PID1, MAML2, CITED2, HMGB2, AHR, HMGB1, HIF3A, IKZF2, BACH1, ETS1, CYR61, ETS2, IRF2BPL, ELK3, PPP3CA, RPS6KA5, HEY1, ZC3H12A, NAMPT, SOX9, EDN1, DDX58, NCOA3, OSR1, TFEB, IL18, NRG1, FOS, RUNX1, ELF1, PLSCR1, IL1B, ITGA6, MET, ZNF750, TLR2, FOXC2, CEBPB, NOTCH1, CEBPD, CTBP2, EPAS1, ADRB2, FOXO3, RNF4, BARX2, FOXO1, EGFR, SBNO2, RXRA, IFI16, HES1, MSX1, PPARGC1A, E2F7, E2F8, J…	594	981	16792	2.19008	6.0167e-07	1.50417e-07	1.47503e-07
KEGG_PATHWAY	hsa05200:Pathways in cancer	46	7.00152	1.88882e-10	LAMA5, CDKN1A, CTBP2, EPAS1, LAMA3, CBLC, PDGFA, CXCR4, PIK3R3, TGFA, LPAR3, CBLB, ETS1, FOXO1, GNAI1, EGFR, FGF5, RXRA, FGF9, RASSF5, RALGDS, JUN, EGLN3, SMAD3, FZD4, ITGA3, ZBTB16, ITGA2, WNT7B, F2R, WNT7A, FOS, WNT9A, PGF, RUNX1, BMP2, KITLG, CDK6, TRAF4, COL4A6, MDM2, COL4A5, ITGA6, MET, BIRC3, BCL2L1	284	393	6879	2.83513	4.66538e-08	4.68427e-08	4.41984e-08
GOTERM_CC_DIRECT	GO:0005737~cytoplasm	243	36.9863	8.54366e-09	ERRFI1, PID1, FAM89B, ZMYND8, RAPH1, DIXDC1, CBLB, MT1X, FNBP1L, BACH1, NUDT4, NIPAL4, RPS6KA5, UBASH3B, TRIM29, RPS6KA2, RASSF5, FTH1, ZC3H12A, NAMPT, CDK20, FAM65B, TNS4, TNS1, EPHA4, DNAAF1, SLC11A2, RFX2, ACTN4, DICER1, RUNX2, RUNX1, DDIT4, SIK1, TRIB1, TRIB2, EPAS1, SHMT1, NEDD4L, IQGAP2, NUAK2, MAP2, S100A13, RREB1, S100A11, NXNL2, PLK3, GADD45B, PLK2, NR1D1, ALOX15B, ELL2, SNAI2, CPEB2, TP…	620	5222	18224	1.3678	3.6225e-06	3.62251e-06	3.40892e-06
GOTERM_CC_DIRECT	GO:0005615~extracellular space	86	13.0898	1.82977e-08	COL18A1, CPM, NRP1, CSF2, B4GALT1, SERPINE2, LRRK2, COL12A1, HMGB2, PRKAG2, PCSK9, CXCL1, HMGB1, PCSK5, SOGA1, TSKU, CX3CL1, LOXL2, IRF2BPL, IL18BP, FGF5, EFEMP1, FGF9, CA2, NAMPT, LIPG, TIMP2, CTSC, CCBE1, EDN1, ANXA1, IL4R, EDN2, ANXA2, IGFBP4, IL18, NRG1, WNT9A, ACTN4, DKK1, F3, YWHAZ, SERPINB5, PGF, DKK3, TGFBR3, LOX, SLPI, IL1B, ADAM9, ZP3, S100A9, LAMA5, PLEKHH3, SEMA3C, HTRA1, PDGFA, TGFA,…	620	1347	18224	1.87665	7.75818e-06	3.8791e-06	3.65038e-06
GOTERM_BP_DIRECT	GO:0030198~extracellular matrix organization	26	3.95738	2.79314e-08	LAMA5, COL18A1, B4GALT1, ITGB4, LAMA3, PDGFA, FBLN1, ITGAE, THBS1, CYR61, ADAMTSL4, KDR, ITGB8, APBB2, SOX9, ITGA3, ITGA2, SERPINB5, LOX, CRISPLD2, MFAP2, BCL3, COL4A6, COL4A5, COL8A1, ITGA6	594	196	16792	3.75002	9.51299e-05	1.90269e-05	1.86582e-05
GOTERM_BP_DIRECT	GO:0010595~positive regulation of endothelial cell migration	13	1.97869	4.36635e-08	CCBE1, NRP1, FOXC2, EDN1, NRP2, ANGPT1, WNT7A, ETS1, THBS1, RHOB, ZC3H12A, KDR, PTK2B	594	46	16792	7.98917	0.000148707	2.47863e-05	2.4306e-05
KEGG_PATHWAY	hsa04151:PI3K-Akt signaling pathway	38	5.78387	5.51049e-08	LAMA5, CDKN1A, ITGB4, LAMA3, PDGFA, PIK3R3, LPAR3, PPP2R2A, FOXO3, THBS1, EGFR, FGF5, RXRA, FGF9, PDGFD, KDR, ITGB8, IL4R, ANGPT1, ITGA3, ITGA2, F2R, TSC2, OSMR, YWHAZ, PGF, KITLG, CDK6, DDIT4, COL4A6, MDM2, COL4A5, ITGA6, SGK1, MET, BCL2L1, EPHA2, TLR2	284	345	6879	2.66791	1.36108e-05	6.83301e-06	6.44728e-06
GOTERM_BP_DIRECT	GO:0045893~positive regulation of transcription, DNA-templated	45	6.84932	6.04131e-08	CDKN1C, FOXC2, EHF, NOTCH1, CITED2, HMGB2, FHL2, AHR, FOXO3, RNF4, ETS1, ETS2, FOXO1, ELK3, LBH, SOX9, PPARGC1A, RREB1, JUN, SMAD3, FZD4, NCOA3, ZBTB16, F2R, TFEB, HMGA2, WNT7A, NR1D2, NR1D1, FOS, ARID1A, KLF4, RUNX2, HIPK2, RUNX1, DAB2, BMP2, ELF1, KLF6, KLF5, IL1B, BCL3, IRF6, ZP3, TP73	594	515	16792	2.47014	0.000205746	2.93953e-05	2.88257e-05
GOTERM_BP_DIRECT	GO:0002040~sprouting angiogenesis	10	1.52207	9.90031e-08	NRP1, CCBE1, NOTCH1, ANGPT1, PTK2B, THBS1, E2F7, PGF, LOXL2, E2F8	594	25	16792	11.3077	0.000337148	4.21506e-05	4.13338e-05
GOTERM_CC_DIRECT	GO:0005886~plasma membrane	196	29.8326	1.40585e-07	IFITM1, RAPH1, CBLC, LDLRAD3, CBLB, FNBP1L, GPR176, ZC3H12A, KDR, EPHB2, EPHA4, PAQR5, ACSL1, DNAAF1, ARRDC2, SLC11A2, C10ORF54, KCNK15, UNC5D, DKK1, EPHA2, SLC22A3, NEDD4L, TGFA, LPAR3, LYPD5, PCDH18, INPP5A, KCNMB4, TSPAN5, KCNN4, PAG1, ABCA1, JAG1, FZD4, GDF5, ALOX15B, IL22RA1, FAT2, NRP1, PTPRU, NRP2, PCSK9, SLC7A11, ABCC10, SHB, CX3CL1, DNER, NCS1, VAV3, GPR39, PRMT8, ANXA1, MME, ANXA2, IFNG…	620	4121	18224	1.39799	5.96061e-05	1.98693e-05	1.86978e-05
GOTERM_BP_DIRECT	GO:0001666~response to hypoxia	23	3.50076	1.80764e-07	EGLN3, SMAD3, CITED2, EPAS1, ITGA2, CAV1, SLC11A2, CXCR4, ACTN4, ATP1B1, ETS1, THBS1, PGF, LOXL2, NR4A2, PDLIM1, TGFBR3, BMP2, DDIT4, CAPN2, PTK2B, AJUBA, TLR2	594	172	16792	3.78021	0.000615494	6.84093e-05	6.70837e-05
GOTERM_CC_DIRECT	GO:0005925~focal adhesion	36	5.47945	1.94283e-07	NRP1, DIXDC1, FHL2, NEDD9, RND3, EGFR, CORO1C, EFNB2, PDLIM1, LIMA1, SDCBP, ALCAM, CAPN2, PTK2B, FLOT2, TNS4, TNS1, SVIL, ANXA1, MME, ITGA3, ITGA2, CAV1, ACTN4, PTPN12, YWHAZ, RHOB, DAB2, ARPC2, ZYX, CD9, ADAM9, ITGA6, AJUBA, PHLDB2, EPHA2	620	391	18224	2.70631	8.23726e-05	2.0594e-05	1.93797e-05
GOTERM_BP_DIRECT	GO:0045892~negative regulation of transcription, DNA-templated	42	6.39269	4.81408e-07	CDKN1C, CEBPB, NOTCH1, CTBP2, CEBPD, CITED2, HMGB2, FHL2, HR, AHR, FOXO1, ELK3, LOXL2, SBNO2, RPS6KA5, IFI16, HEY1, BASP1, HES1, SOX9, LRRFIP1, KLF10, JUN, VDR, ZBTB16, PHF12, HMGA2, NRG1, NR1D2, NR1D1, KLF4, RUNX2, RUNX1, DKK3, DAB2, BMP2, ID1, BCL3, BHLHE40, MDM2, BCOR, ZP3	594	499	16792	2.37939	0.00163833	0.000163968	0.00016079
GOTERM_BP_DIRECT	GO:0030335~positive regulation of cell migration	23	3.50076	5.90179e-07	SEMA5A, COL18A1, EDN1, NOTCH1, SMAD3, SEMA3C, SEMA4B, F2R, PDGFA, IRS2, ACTN4, F3, THBS1, CYR61, EGFR, SDCBP, DAB2, BMP2, PDGFD, KDR, PTK2B, SNAI2, ITGA6	594	184	16792	3.53367	0.00200813	0.000182741	0.0001792
GOTERM_CC_DIRECT	GO:0009986~cell surface	43	6.5449	6.2285e-07	CPM, NRP1, NOTCH1, FAM89B, ITGB4, PDGFA, CXCR4, PCSK9, TGFA, HMGB1, SLC7A11, IQGAP2, TFPI, THBS1, EGFR, CX3CL1, CLMP, LIPG, TIMP2, ITGB8, DMD, CD55, TNS1, EPHA4, ANXA1, ANXA2, FZD4, ITGA3, ITGA2, SLC11A2, F2R, C10ORF54, WNT7A, UNC5D, F3, TGFBR3, BMP2, PLXNB2, ADAM9, ITGA6, MET, EPHA2, TLR2	620	542	18224	2.33196	0.000264054	5.28177e-05	4.97034e-05
GOTERM_BP_DIRECT	GO:0007155~cell adhesion	39	5.93607	1.05972e-06	SEMA5A, COL18A1, PTPRU, NRP2, B4GALT1, ITGB4, LAMA3, COL12A1, NEDD9, ITGAE, RND3, THBS1, PCDH18, CYR61, CX3CL1, LOXL2, EFNB2, ALCAM, FLOT2, ABL2, ITGB8, HES1, IGFBP7, CTNNAL1, EPHA4, ITGA3, ITGA2, ATP1B1, MTSS1, RHOB, KITLG, NINJ1, CDH11, COL4A6, ZYX, COL8A1, CD9, ADAM9, ITGA6	594	459	16792	2.40197	0.00360291	0.000300785	0.000294956
GOTERM_BP_DIRECT	GO:0010628~positive regulation of gene expression	27	4.10959	2.15572e-06	CSF2, PID1, CITED2, FBLN1, PRDM1, FGF9, NFIL3, RPS6KA2, ZC3H12A, ITGB8, SMAD3, ITGA3, DDX58, VDR, OSR1, NCOA3, CAV1, HMGA2, KLF4, BMP2, PLSCR1, RGCC, CDK6, IL1B, ID1, MDM2, TLR2	594	262	16792	2.91325	0.00731549	0.000564798	0.000553854
GOTERM_CC_DIRECT	GO:0005856~cytoskeleton	32	4.87062	4.13641e-06	FHOD3, PLEKHH3, DDX20, RAPH1, SLC7A11, FNBP1L, PDLIM1, ARHGAP21, SDCBP, MARVELD1, BASP1, ARHGDIB, ZC3H12A, PTK2B, STOM, FAM65B, DMD, LRRFIP1, TNS4, CTNNAL1, SYBU, TNS1, TPM1, ALOX15B, SSH1, KITLG, FRMD6, TRAF4, FSCN1, TNIK, S100A9, TRIB2	620	371	18224	2.53529	0.0017523	0.000292306	0.000275071
GOTERM_MF_DIRECT	GO:0003700~transcription factor activity, sequence-specific DNA binding	62	9.43683	4.69309e-06	CSRNP1, EHF, THRB, CITED2, HMGB2, HR, TFCP2L1, AHR, HMGB1, PRDM1, IKZF2, BACH1, ETS1, ETS2, NR3C2, ELK3, HEY1, TRIM29, SOX9, TGIF1, KLF10, ZFP1, TSC22D3, TFEB, RFX2, FOS, RUNX2, RUNX1, ELF1, IRF6, FOXC2, CEBPB, NOTCH1, CEBPD, EPAS1, MYNN, FOXO3, RNF4, ZFP36L1, RXRA, NFIL3, ZKSCAN2, HES1, HIVEP2, RREB1, E2F7, E2F8, JUN, SMAD3, VDR, ZBTB16, NR1D2, NR1D1, KLF4, KLF3, SMAD7, KLF5, NFIA, ID1, BCL3, BH…	592	961	16881	1.83969	0.00407	0.00203915	0.00198048
GOTERM_CC_DIRECT	GO:0070062~extracellular exosome	137	20.8524	7.42118e-06	SEMA5A, ALDH1L1, CD82, COL12A1, CBLC, FNBP1L, SOGA1, EFEMP1, ALCAM, FGF9, BASP1, FTH1, ARHGDIB, NAMPT, CAPN2, ACOT11, HPCAL1, ACTN4, ATP1B1, TPST2, ALDH3A2, C1ORF116, SLPI, CRISPLD2, PSG4, S100A6, FSCN1, COL8A1, ADAM9, TNIK, PHPT1, S100A9, FKBP5, SHMT1, HTRA1, RHOBTB3, NEDD4L, FBLN1, IQGAP2, NDRG1, ACACA, RTN4, SDCBP, INPP5A, PDGFD, ALDH3B1, S100A13, IGFBP7, RREB1, S100A11, FZD4, CRIM1, RAB27B, A…	620	2811	18224	1.43256	0.00314165	0.000449511	0.000423007
GOTERM_BP_DIRECT	GO:0007507~heart development	21	3.19635	7.64427e-06	FOXC2, EDN1, NRP2, NOTCH1, CALCRL, CITED2, ITGA3, OSR1, MICAL2, TSC2, ECE1, PCSK5, HOPX, BICC1, ZFP36L1, BMP2, LOX, RPS6KA2, ID1, SH3PXD2B, BCOR	594	183	16792	3.24402	0.0257004	0.00185974	0.0018237
GOTERM_MF_DIRECT	GO:0008134~transcription factor binding	27	4.10959	8.05327e-06	CEBPB, EPAS1, HMGB2, FHL2, AHR, HMGB1, RNF4, ETS1, IFI16, HEY1, APBB2, HES1, PPARGC1A, JUN, SMAD3, HMGA2, FOS, YWHAZ, RUNX1, KLF5, NFIA, ID1, BCL3, BCOR, TRIB1, TRIB2, TP73	592	284	16881	2.71095	0.00697389	0.00233276	0.00226565
GOTERM_BP_DIRECT	GO:0007229~integrin-mediated signaling pathway	15	2.28311	9.62654e-06	VAV3, LAMA5, ITGB4, ITGA3, ITGA2, NEDD9, FBLN1, ITGAE, DAB2, ADAMTS1, ZYX, PTK2B, ITGB8, ADAM9, ITGA6	594	99	16792	4.28324	0.0322565	0.00200114	0.00196237
GOTERM_BP_DIRECT	GO:0008284~positive regulation of cell proliferation	37	5.63166	9.65654e-06	COL18A1, CSF2, NOTCH1, PDGFA, TGFA, IRS2, ETS1, THBS1, EGFR, PTHLH, FGF5, EFNB2, SDCBP, FGF9, PDGFD, NAMPT, S100A13, KDR, PTK2B, HES1, SOX9, EDN1, EDN2, ST8SIA1, F2R, TBC1D8, AKR1C3, AKR1C2, NRG1, OSMR, RUNX2, PGF, HIPK2, CDC25B, KLF5, MDM2, BCL2L1	594	466	16792	2.24456	0.0323553	0.00200114	0.00196237
GOTERM_BP_DIRECT	GO:0030334~regulation of cell migration	13	1.97869	9.98809e-06	LAMA5, JAG1, SERPINE2, DDX58, LAMA3, CXCR4, RTN4, RHOB, LMNA, PLXNA2, PLXNB2, SGK1, AJUBA	594	74	16792	4.96624	0.0334474	0.00200114	0.00196237
KEGG_PATHWAY	hsa04510:Focal adhesion	24	3.65297	1.0933e-05	VAV3, LAMA5, JUN, ITGB4, ITGA3, ITGA2, CAV1, LAMA3, PDGFA, PIK3R3, ACTN4, THBS1, EGFR, PGF, PDGFD, COL4A6, ZYX, KDR, CAPN2, COL4A5, ITGB8, ITGA6, MET, BIRC3	284	206	6879	2.82196	0.00269683	0.000903799	0.000852778
GOTERM_BP_DIRECT	GO:0042493~response to drug	28	4.2618	1.11085e-05	BCAR3, COL18A1, CDKN1A, NNMT, SEMA3C, HMGB2, MGST1, TGFA, THBS1, TIMP2, PTK2B, PPARGC1A, TGIF1, ABCA1, VAV3, BCHE, JUN, ANXA1, TRPA1, ACSL1, ITGA3, ITGA2, FOS, PGF, DUSP6, LOX, MDM2, TP73	594	304	16792	2.60376	0.0371288	0.00209957	0.00205888
GOTERM_BP_DIRECT	GO:0006915~apoptotic process	42	6.39269	1.17122e-05	CSRNP1, TNFAIP8, CXCR4, PCSK9, AHR, HIF3A, SHB, FOXO1, RTN4, ZFP36L1, NUAK2, ADAMTSL4, RASSF5, CASP4, ZC3H12A, PTK2B, TNS4, RNF152, PHLDA1, CTSC, PLK3, EGLN3, SEMA6A, GADD45B, ZBTB16, NEK6, UNC5D, ALOX15B, RHOB, GULP1, RNF144B, DAB2, PLSCR1, TRAF4, IL1B, SGK1, S100A9, CARD14, TNFRSF21, BIRC3, TLR2, TP73	594	567	16792	2.09403	0.0391068	0.00209957	0.00205888
GOTERM_CC_DIRECT	GO:0005829~cytosol	155	23.5921	1.47823e-05	ERRFI1, ALDH1L1, MIDN, SERPINE2, DIXDC1, RNF19B, HSF2BP, CBLB, PPP2R2A, IRS2, BACH1, SAT1, NUDT4, ZFYVE28, RPS6KA2, SESN1, FTH1, ARHGDIB, NAMPT, CAPN2, GRB10, EPHB2, PHLDA1, FBXW7, OSR1, TPM1, ACOT11, TSC2, DICER1, MID1, CDC25B, DDIT4, S100A6, FSCN1, RAB38, PHPT1, S100A9, AJUBA, NNMT, NOTCH1, EPAS1, SHMT1, HTRA1, RHOBTB3, NEDD4L, PIK3R3, FOXO3, IQGAP2, NDRG1, FOXO1, RAP1GAP, ACACA, ZFP36L1, SDCBP…	620	3315	18224	1.37436	0.00624814	0.000783462	0.000737268
KEGG_PATHWAY	hsa04360:Axon guidance	18	2.73973	1.52515e-05	SEMA5A, EPHA4, NRP1, SEMA6A, SEMA3C, SEMA4B, NTN4, CXCR4, UNC5D, GNAI1, EFNB2, PPP3CA, PLXNA2, PLXNB2, SRGAP3, EPHB2, MET, EPHA2	284	127	6879	3.43302	0.00376007	0.000945596	0.000892215
GOTERM_MF_DIRECT	GO:0005178~integrin binding	15	2.28311	1.73894e-05	LAMA5, ITGA3, ITGA2, NRG1, FBLN1, ACTN4, THBS1, CYR61, EGFR, CX3CL1, TIMP2, KDR, CD9, ADAM9, ITGA6	592	105	16881	4.0736	0.0149979	0.00377785	0.00366917
GOTERM_BP_DIRECT	GO:0043547~positive regulation of GTPase activity	41	6.24049	2.43601e-05	BCAR3, DOCK5, RGS17, ERRFI1, DOCK4, CSF2, LRRK2, PDGFA, IRS2, DENND3, FNBP1L, RAP1GAP, EGFR, CX3CL1, FGF5, ARHGAP21, FGF9, RASGEF1B, ARHGDIB, RGS20, SRGAP3, RALGDS, MCF2L2, CYTH1, VAV3, PLEKHG3, EIF2B5, JUN, ARHGEF37, ANGPT1, SH2D3C, TSC2, NRG1, KITLG, RASA3, DLG4, ST5, CDC42EP4, RGN, ITGA6, SMAP2	594	565	16792	2.0514	0.0796227	0.00414853	0.00406814
GOTERM_MF_DIRECT	GO:0003714~transcription corepressor activity	21	3.19635	3.12054e-05	TGIF1, THRB, CTBP2, CITED2, HR, NR1D1, TFCP2L1, HIF3A, HIPK2, HDAC7, LOXL2, ELK3, RUNX1, NFIL3, BASP1, BHLHE40, MXI1, BCOR, AJUBA, E2F7, E2F8	592	203	16881	2.94985	0.0267535	0.0054235	0.00526747
GOTERM_BP_DIRECT	GO:0043066~negative regulation of apoptotic process	35	5.32725	3.39201e-05	CDKN1A, TNFAIP8, CITED2, FHL2, TGFA, THBS1, FOXO1, CYR61, EGFR, FAM129B, NUAK2, KDR, PTK2B, APBB2, SOX9, MSX1, PLK3, ANXA1, SMAD3, ANGPT1, DUSP1, OSR1, PLK2, HMGA2, WNT7A, YWHAZ, DAB2, ID1, BCL3, RGN, MDM2, CARD14, STK40, BIRC3, BCL2L1	594	455	16792	2.17457	0.10911	0.00550152	0.00539491
GOTERM_BP_DIRECT	GO:0007165~signal transduction	68	10.3501	4.64947e-05	BCAR3, NRP1, RAPH1, IRS2, CBLB, CXCL1, SHB, NR3C2, ELK3, ALCAM, FGF9, IMPA2, RPS6KA2, NAMPT, GRB10, SOX9, TLE3, ANXA1, IL4R, IFNGR1, IGFBP4, PDE4D, ARRDC2, UNC5D, YWHAZ, PGF, RUNX1, TRAF4, RASA3, IL1B, S100A6, S100A9, MET, TNFRSF21, TLR2, PLEKHH3, EPAS1, NRXN3, NEDD9, IQGAP2, PLCXD2, RAP1GAP, EGFR, FYB, CORO1C, ARHGAP21, PTK2B, ABL2, HIVEP2, SRGAP3, GABRE, RALGDS, S100A11, PAG1, MYO10, KLRC2, VDR…	594	1161	16792	1.65574	0.146461	0.00719822	0.00705874
GOTERM_BP_DIRECT	GO:0045766~positive regulation of angiogenesis	15	2.28311	5.37331e-05	SEMA5A, CCBE1, BTG1, ETS1, F3, THBS1, CX3CL1, PGF, HIPK2, RHOB, RUNX1, IL1B, ZC3H12A, KDR, PTK2B	594	115	16792	3.68731	0.167248	0.00795716	0.00780297
GOTERM_MF_DIRECT	GO:0051015~actin filament binding	16	2.43531	5.98133e-05	SVIL, MYO10, TPM1, ACTN4, IQGAP2, EGFR, CORO1C, MYO1D, LIMA1, MYO1B, ARPC2, FSCN1, ADSSL1, ABL2, AJUBA, CTNNAL1	592	132	16881	3.45639	0.0506515	0.00866296	0.00841374
GOTERM_BP_DIRECT	GO:0030324~lung development	12	1.82648	6.92107e-05	LAMA5, CCBE1, NOTCH1, LOX, EPAS1, CRISPLD2, ITGA3, DNAAF1, WNT7B, HES1, HMGB1, EGFR	594	76	16792	4.46358	0.210014	0.00982216	0.00963183
GOTERM_CC_DIRECT	GO:0005604~basement membrane	12	1.82648	7.05109e-05	LAMA5, COL18A1, FRAS1, FGF9, ANXA2, ADAMTS1, SMOC1, LAMA3, NTN4, FBLN1, ITGA6, LOXL2	620	79	18224	4.46484	0.0294552	0.00332185	0.00312599
GOTERM_CC_DIRECT	GO:0045121~membrane raft	20	3.04414	8.08013e-05	ABCA1, ANXA2, ANGPT1, CAV1, CBLC, CBLB, EGFR, GNAI1, SDCBP, PLSCR1, MARVELD1, KDR, CAPN2, PTK2B, STOM, DMD, CD55, PAG1, BIRC3, TLR2	620	206	18224	2.85374	0.0336809	0.00342597	0.00322397
GOTERM_MF_DIRECT	GO:0046982~protein heterodimerization activity	34	5.17504	0.00010114	CEBPB, NOTCH1, CEBPD, EPAS1, PDGFA, AHR, IKZF2, EGFR, PPP3CA, SDCBP, RXRA, IRAK2, CAPN2, FLOT2, SOX9, MAPK4, JUN, PRMT8, SMAD3, FZD4, ITGA3, ITGA2, CAV1, FOS, MID1, PGF, RUNX1, NR4A2, POLE4, EXT1, BMP2, BHLHE40, BCL2L1, TLR2	592	465	16881	2.08498	0.0841434	0.0125559	0.0121946
GOTERM_CC_DIRECT	GO:0043235~receptor complex	15	2.28311	0.000106342	NRP1, IL4R, NOTCH1, SMAD3, KLRC2, ITGB4, ITGA3, VDR, ITPR3, ADRB2, EGFR, NR3C2, TGFBR3, RXRA, NT5DC3	620	127	18224	3.47168	0.0440901	0.00409902	0.00385733
GOTERM_BP_DIRECT	GO:0008283~cell proliferation	29	4.414	0.000111092	LAMA5, PDXK, EHF, CITED2, TGFA, IRS2, CXCL1, CYR61, EGFR, ZFP36L1, FGF5, IFI16, LIPG, POC1B, E2F8, FAM83A, KLF10, IGFBP4, TXNRD1, ITGA2, EMP1, NRG1, DAB2, KITLG, DDIT4, FSCN1, TACC1, MET, BCL2L1	594	366	16792	2.23992	0.315043	0.0151351	0.0148418
GOTERM_BP_DIRECT	GO:0071526~semaphorin-plexin signaling pathway	8	1.21766	0.000126819	SEMA5A, NRP1, SEMA6A, SEMA3C, SEMA4B, PLXNA2, PLXNB2, MET	594	33	16792	6.85318	0.350774	0.0166133	0.0162914
KEGG_PATHWAY	hsa04015:Rap1 signaling pathway	22	3.34855	0.000135434	DOCK4, ANGPT1, F2R, PDGFA, PIK3R3, LPAR3, THBS1, EGFR, FYB, PGF, GNAI1, RAP1GAP, FGF5, KITLG, FGF9, RASSF5, PDGFD, ID1, KDR, MET, RALGDS, EPHA2	284	210	6879	2.53753	0.032901	0.00671752	0.0063383
GOTERM_CC_DIRECT	GO:0030175~filopodium	11	1.67428	0.000135628	ARL4C, EPHA4, KITLG, MYO1B, B4GALT1, FSCN1, RAPH1, FAM65B, ITGA6, DMD, IQGAP2	620	71	18224	4.55393	0.0558877	0.00479219	0.00450963
GOTERM_BP_DIRECT	GO:0030511~positive regulation of transforming growth factor beta receptor signaling pathway	7	1.06545	0.000147732	CDKN1C, TGFBR3, SDCBP, DAB2, CITED2, THBS1, HIPK2	594	24	16792	8.24523	0.395414	0.0186361	0.0182749
KEGG_PATHWAY	hsa05222:Small cell lung cancer	13	1.97869	0.000166164	LAMA5, ITGA3, ITGA2, LAMA3, PIK3R3, RXRA, CDK6, TRAF4, COL4A6, COL4A5, ITGA6, BIRC3, BCL2L1	284	85	6879	3.70452	0.0402149	0.0068681	0.00648038
GOTERM_MF_DIRECT	GO:0031490~chromatin DNA binding	10	1.52207	0.000171032	FOXC2, RXRA, NOTCH1, SMAD3, THRB, HR, ACTN4, GRHL1, FOXO3, PPARGC1A	592	58	16881	4.91641	0.13812	0.0151617	0.0147255
GOTERM_MF_DIRECT	GO:0042803~protein homodimerization activity	46	7.00152	0.000171799	CEBPB, PDXK, B4GALT1, CTBP2, CEBPD, SHMT1, LRRK2, MGST1, PDGFA, ECE1, ADRB2, IKZF2, RAP1GAP, TRIM8, SDCBP, IRAK2, IMPA2, KYNU, NAMPT, S100A13, STOM, HES1, LRRFIP1, S100A11, MAPK4, E2F8, JUN, PRMT8, ANXA1, SMAD3, FZD4, ZBTB16, TSC2, ACTN4, MID1, PGF, RUNX1, NR4A2, EXT1, ID1, DPYD, BHLHE40, S100A6, ADSSL1, MGLL, BCL2L1	592	730	16881	1.79685	0.138695	0.0151617	0.0147255
GOTERM_MF_DIRECT	GO:0008083~growth factor activity	17	2.58752	0.000184014	JAG1, CSF2, BMP8A, PDGFA, TGFA, CXCL1, NRG1, OSGIN2, GDF5, DKK1, PGF, FGF5, BMP2, KITLG, EFEMP1, FGF9, PDGFD	592	162	16881	2.99234	0.14779	0.0151617	0.0147255
GOTERM_BP_DIRECT	GO:0035335~peptidyl-tyrosine dephosphorylation	13	1.97869	0.00018881	DUSP4, DUSP5, PTPRU, DUSP1, EYA4, PTPN12, DUSP6, SSH1, CDC25B, DUSP23, PTPRE, DUSP10, UBASH3B	594	99	16792	3.71214	0.474365	0.0229674	0.0225223
GOTERM_MF_DIRECT	GO:0004725~protein tyrosine phosphatase activity	13	1.97869	0.00019192	DUSP4, DUSP5, PTPRU, DUSP1, EYA4, PTPN12, DUSP6, SSH1, CDC25B, DUSP23, PTPRE, DUSP10, UBASH3B	592	100	16881	3.70698	0.153626	0.0151617	0.0147255
GOTERM_CC_DIRECT	GO:0005576~extracellular region	82	12.481	0.000212823	COL18A1, NRP2, CSF2, SERPINE2, COL12A1, CXCL1, HMGB1, IL1RAP, TREM1, CYR61, CX3CL1, IL18BP, FGF5, LFNG, EFEMP1, FGF9, TMSB4X, LIPG, CASP4, TIMP2, KDR, NRCAM, EPHB2, PAMR1, EDN1, IZUMO4, ANXA1, EDN2, IGFBP4, F2R, IL18, NRG1, IL17RE, WNT9A, ACTN4, DKK1, PGF, DKK3, TGFBR3, CDCP1, GFOD1, LOX, CRISPLD2, IL1B, COL4A6, RGN, SCG5, COL4A5, COL8A1, ZP3, S100A9, MET, LAMA5, NOTCH1, LAMA3, NTN4, HTRA1, PDGFA…	620	1610	18224	1.49706	0.086294	0.00694129	0.00653202
GOTERM_BP_DIRECT	GO:0045600~positive regulation of fat cell differentiation	9	1.36986	0.000214834	BMP2, CEBPB, KLF5, ZBTB16, LMO3, SH3PXD2B, ZC3H12A, SNAI2, ZFP36L1	594	47	16792	5.41328	0.518959	0.0252319	0.0247429
GOTERM_BP_DIRECT	GO:0032331~negative regulation of chondrocyte differentiation	6	0.913242	0.000234723	EFEMP1, SNAI2, SOX9, WNT9A, GDF5, PTHLH	594	17	16792	9.97742	0.550473	0.0261404	0.0256339
GOTERM_BP_DIRECT	GO:0048661~positive regulation of smooth muscle cell proliferation	10	1.52207	0.000237919	EDN1, JUN, CALCRL, PDGFD, ITGA2, NAMPT, IL18, THBS1, PPARGC1A, EGFR	594	60	16792	4.71156	0.555341	0.0261404	0.0256339
GOTERM_BP_DIRECT	GO:0060411~cardiac septum morphogenesis	5	0.761035	0.000272782	NOTCH1, JAG1, HEY1, MDM2, DHRS3	594	10	16792	14.1347	0.605139	0.0287527	0.0281955
GOTERM_BP_DIRECT	GO:0007267~cell-cell signaling	22	3.34855	0.000278579	SEMA5A, KLF10, NRP1, EDN1, IL18, PDGFA, ADRB2, WNT9A, MERTK, PCSK5, GDF5, CYR61, PGF, PTHLH, FGF5, EFNB2, BMP2, FGF9, IL1B, NAMPT, ZYX, S100A9	594	254	16792	2.44853	0.612861	0.0287527	0.0281955
GOTERM_MF_DIRECT	GO:0019838~growth factor binding	7	1.06545	0.00028338	SDCBP, NRP1, NRP2, DUSP1, RHBDF2, KDR, OSMR	592	27	16881	7.39283	0.218306	0.0205214	0.0199311
GOTERM_CC_DIRECT	GO:0005913~cell-cell adherens junction	25	3.80518	0.000301604	FNBP1L, NDRG1, EGFR, RTN4, FAM129B, PDLIM1, LIMA1, SDCBP, TRIM29, FLOT2, LRRFIP1, S100A11, ANXA1, ANXA2, YWHAZ, SMAD7, MYO1B, FMNL2, FSCN1, ZYX, FAT2, ITGA6, PHLDB2, PFKP, EPHA2	620	323	18224	2.27504	0.120058	0.0090604	0.00852618
GOTERM_CC_DIRECT	GO:0005769~early endosome	20	3.04414	0.000324349	NRP1, ANXA2, F2R, SLC11A2, DYSF, CXCR4, PCSK9, ECE1, HMGB1, ADRB2, RAP1GAP, RHOB, MYO1B, RAB31, RASGEF1B, DNER, LIPG, KDR, RAB38, ATP9A	620	229	18224	2.56712	0.128506	0.0090604	0.00852618
GOTERM_BP_DIRECT	GO:0060021~palate development	11	1.67428	0.000327362	TGFBR3, CSRNP1, FRAS1, TIPARP, OSR1, WNT7A, SNAI2, BCOR, MSX1, EPHB2, DHRS3	594	76	16792	4.09162	0.672143	0.032794	0.0321585
GOTERM_BP_DIRECT	GO:0006366~transcription from RNA polymerase II promoter	35	5.32725	0.000340108	CSRNP1, FOXC2, CEBPB, EHF, CEBPD, EPAS1, HSF2BP, AHR, HIF3A, FOXO3, ETS1, BARX2, BACH1, ELK3, NFIL3, TRIM29, SOX9, MSX1, HIVEP2, RREB1, NFRKB, JUN, HMGA2, FOS, GRHL1, KLF4, RUNX2, RUNX1, ELF1, PLSCR1, KLF5, NFIA, TAF3, ZNF750, TP73	594	513	16792	1.92871	0.686076	0.0330974	0.032456
GOTERM_CC_DIRECT	GO:0005634~nucleus	224	34.0944	0.000341902	ERRFI1, EHF, MAML2, ZMYND8, CBLC, CBLB, MT1X, IKZF2, BACH1, NUDT4, ELK3, RPS6KA5, UBASH3B, RPS6KA2, RASSF5, FTH1, ZC3H12A, CDK20, KDR, SOX9, NFRKB, ZFP1, DNAAF1, SLC11A2, RFX2, ACTN4, DICER1, RUNX2, RUNX1, SIK1, TRIB1, TRIB2, CTBP2, EPAS1, SHMT1, MYNN, MGST1, NEDD4L, TGFA, NUAK2, S100A13, HIVEP2, RREB1, PPARGC1A, RALGDS, S100A11, PLK3, JUN, PHC2, GADD45B, TIPARP, MICAL2, NR1D2, NR1D1, ALOX15B, ID…	620	5415	18224	1.21591	0.13497	0.0090604	0.00852618
KEGG_PATHWAY	hsa04115:p53 signaling pathway	11	1.67428	0.000367026	CDKN1A, CDK6, SESN3, CD82, GADD45B, SESN1, MDM2, TSC2, THBS1, SERPINB5, TP73	284	67	6879	3.97672	0.0866829	0.0130032	0.0122692
GOTERM_BP_DIRECT	GO:0002062~chondrocyte differentiation	8	1.21766	0.000380043	BMP2, FGF9, OSR1, WNT7A, HMGA2, GDF5, RUNX2, RUNX1	594	39	16792	5.79884	0.726012	0.0346175	0.0339467
GOTERM_BP_DIRECT	GO:0007179~transforming growth factor beta receptor signaling pathway	12	1.82648	0.000390595	TGFBR3, KLF10, JUN, SMAD3, CITED2, ID1, ZYX, ADAM9, FOS, GDF5, HIPK2, SMAD7	594	92	16792	3.68731	0.735688	0.0346175	0.0339467
GOTERM_BP_DIRECT	GO:0000187~activation of MAPK activity	13	1.97869	0.000392183	DUSP5, LRRK2, CXCR4, TGFA, NRG1, LPAR3, THBS1, DUSP6, BMP2, IRAK2, IL1B, AVPI1, TP73	594	107	16792	3.4346	0.737115	0.0346175	0.0339467
GOTERM_BP_DIRECT	GO:0032332~positive regulation of chondrocyte differentiation	6	0.913242	0.000415961	SMAD3, ZBTB16, SOX9, GDF5, RUNX2, LOXL2	594	19	16792	8.92717	0.757574	0.0346175	0.0339467
GOTERM_BP_DIRECT	GO:1901653~cellular response to peptide	5	0.761035	0.000416711	KLF10, KLF5, ID1, KLF4, KLF3	594	11	16792	12.8497	0.758192	0.0346175	0.0339467
GOTERM_BP_DIRECT	GO:0048016~inositol phosphate-mediated signaling	5	0.761035	0.000416711	EDN1, HRH1, INPP5A, EDN2, ITPR3	594	11	16792	12.8497	0.758192	0.0346175	0.0339467
GOTERM_BP_DIRECT	GO:0046330~positive regulation of JNK cascade	10	1.52207	0.000440006	SDCBP, TRAF4, TAOK3, GADD45B, IL1B, TAOK1, WNT7A, PTK2B, HMGB1, HIPK2	594	65	16792	4.34913	0.776645	0.0353914	0.0347056
GOTERM_BP_DIRECT	GO:0010508~positive regulation of autophagy	8	1.21766	0.000446808	TRIM8, PLK2, LRRK2, ZC3H12A, TFEB, RNF152, FOXO1, TPCN1	594	40	16792	5.65387	0.781762	0.0353914	0.0347056
GOTERM_MF_DIRECT	GO:0001078~transcriptional repressor activity, RNA polymerase II core promoter proximal region sequence-specific binding	13	1.97869	0.000508789	TGIF1, HMGA2, NR1D1, PRDM1, BACH1, ETS2, FOXO1, IFI16, NFIL3, BHLHE40, SNAI2, HES1, E2F8	592	111	16881	3.33962	0.357411	0.0340106	0.0330322
GOTERM_CC_DIRECT	GO:0031012~extracellular matrix	23	3.50076	0.000527934	LAMA5, COL18A1, ANXA2, SERPINE2, COL12A1, HTRA1, FBLN1, F3, THBS1, CYR61, LOXL2, PLSCR1, FRAS1, EFEMP1, SLPI, ADAMTSL4, LMNA, TIMP2, COL8A1, IGFBP7, ZP3, S100A9, PFKP	620	296	18224	2.28396	0.200607	0.0131673	0.0123909
GOTERM_BP_DIRECT	GO:0001892~embryonic placenta development	6	0.913242	0.000538618	CEBPB, CSF2, CITED2, EPAS1, TFEB, EGFR	594	20	16792	8.48081	0.840391	0.0416939	0.040886
GOTERM_BP_DIRECT	GO:0048146~positive regulation of fibroblast proliferation	9	1.36986	0.000572399	CDKN1A, JUN, CDK6, ANXA2, PDGFD, S100A6, PDGFA, FBLN1, EGFR	594	54	16792	4.71156	0.857747	0.0433242	0.0424847
GOTERM_MF_DIRECT	GO:0017154~semaphorin receptor activity	5	0.761035	0.00058811	NRP1, NRP2, PLXNA2, PLXNB2, MET	592	12	16881	11.8813	0.400235	0.0365048	0.0354546
GOTERM_MF_DIRECT	GO:0001077~transcriptional activator activity, RNA polymerase II core promoter proximal region sequence-specific binding	20	3.04414	0.000661954	FOXC2, JUN, EHF, CEBPB, CEBPD, EPAS1, HMGA2, FOS, KLF4, GRHL1, RUNX2, ELK3, NR4A2, ELF1, PLSCR1, KLF5, NFIA, SOX9, ZNF750, TP73	592	236	16881	2.41654	0.437536	0.0383492	0.0372459
GOTERM_BP_DIRECT	GO:0060070~canonical Wnt signaling pathway	11	1.67428	0.000669167	NR4A2, PTPRU, SMAD3, FZD4, WNT7B, LRRK2, DIXDC1, WNT7A, SNAI2, WNT9A, KLF4	594	83	16792	3.74654	0.89771	0.0495475	0.0485874
GOTERM_BP_DIRECT	GO:0030879~mammary gland development	6	0.913242	0.000686563	B4GALT1, ITGA2, CAV1, IRS2, NRG1, SOX9	594	21	16792	8.07696	0.903599	0.0497539	0.0487898
GOTERM_CC_DIRECT	GO:0048471~perinuclear region of cytoplasm	38	5.78387	0.000695096	CDKN1A, RASEF, HMGB2, PCSK9, TGFA, MT1X, ECE1, NDRG1, EGFR, STX10, RAB40B, LMNA, NCS1, S100A13, PTK2B, FLOT2, STOM, SCYL2, ATP9A, ABCA1, ANXA2, ITGA3, GALNT2, ITGA2, CAV1, USP2, SLC11A2, TSC2, ACTN4, DNM3, MYO1B, MLPH, TRAF4, NEDD4, BCL3, S100A6, TNIK, ZP3	620	621	18224	1.79864	0.255337	0.0163734	0.015408
GOTERM_BP_DIRECT	GO:0007173~epidermal growth factor receptor signaling pathway	9	1.36986	0.000734666	RPS6KA5, EFEMP1, PTK2B, TGFA, CBLB, SOX9, PAG1, EGFR, FAM83A	594	56	16792	4.54329	0.918176	0.0511651	0.0501737
GOTERM_BP_DIRECT	GO:0051897~positive regulation of protein kinase B signaling	11	1.67428	0.000736081	SEMA5A, ANGPT1, AKR1C3, IL18, PDGFA, AKR1C2, NRG1, ZP3, THBS1, F3, EGFR	594	84	16792	3.70194	0.91857	0.0511651	0.0501737
GOTERM_MF_DIRECT	GO:0017017~MAP kinase tyrosine/serine/threonine phosphatase activity	5	0.761035	0.000826076	DUSP4, DUSP5, DUSP10, DUSP1, DUSP6	592	13	16881	10.9674	0.51235	0.0448663	0.0435755
GOTERM_BP_DIRECT	GO:0060317~cardiac epithelial to mesenchymal transition	5	0.761035	0.000853337	TGFBR3, BMP2, NOTCH1, HEY1, RTN4	594	13	16792	10.8728	0.945399	0.0569896	0.0558852
GOTERM_BP_DIRECT	GO:0014032~neural crest cell development	5	0.761035	0.000853337	FOXC2, EDN1, SNAI2, NRG1, SOX9	594	13	16792	10.8728	0.945399	0.0569896	0.0558852
GOTERM_BP_DIRECT	GO:0071364~cellular response to epidermal growth factor stimulus	7	1.06545	0.000927998	ERRFI1, ID1, SNAI2, SOX9, PTPN12, EGFR, ZFP36L1	594	33	16792	5.99653	0.957669	0.0577183	0.0565998
GOTERM_BP_DIRECT	GO:0043491~protein kinase B signaling	7	1.06545	0.000927998	PLK3, IL1B, TSC2, SOX9, MERTK, EPHA2, ZFP36L1	594	33	16792	5.99653	0.957669	0.0577183	0.0565998
GOTERM_BP_DIRECT	GO:0051592~response to calcium ion	9	1.36986	0.000932033	PPP3CA, DUSP1, CAV1, NEDD4, ADAM9, PTK2B, ITPR3, THBS1, EGFR	594	58	16792	4.38662	0.958247	0.0577183	0.0565998
GOTERM_BP_DIRECT	GO:0070373~negative regulation of ERK1 and ERK2 cascade	9	1.36986	0.000932033	DUSP4, ERRFI1, DUSP1, LMO3, FBLN1, SPRY1, DMD, KLF4, DUSP6	594	58	16792	4.38662	0.958247	0.0577183	0.0565998
GOTERM_BP_DIRECT	GO:0006954~inflammatory response	27	4.10959	0.00100738	CEBPB, CXCR4, CXCL1, HMGB1, IL1RAP, THBS1, HRH1, RPS6KA5, IFI16, IRAK2, CASP4, NFKBIZ, ZC3H12A, NFRKB, ANXA1, IGFBP4, F2R, IL18, IL17RE, FOS, BMP2, IL1B, S100A9, MGLL, TNFRSF21, EPHA2, TLR2	594	379	16792	2.01391	0.967706	0.0612705	0.0600832
GOTERM_BP_DIRECT	GO:0000165~MAPK cascade	21	3.19635	0.00105346	DUSP5, CSF2, ANGPT1, CAV1, LRRK2, IL18, PDGFA, NRG1, IRS2, EGFR, DUSP6, ZFP36L1, FGF5, KITLG, RASA3, FGF9, TAOK3, DLG4, IL1B, PTK2B, MAPK4	594	262	16792	2.26586	0.972401	0.0628871	0.0616685
GOTERM_BP_DIRECT	GO:0033137~negative regulation of peptidyl-serine phosphorylation	6	0.913242	0.00107089	PDE4D, CAV1, DDIT4, DMD, DKK1, SMAD7	594	23	16792	7.37462	0.973993	0.0628871	0.0616685
GOTERM_BP_DIRECT	GO:0001837~epithelial to mesenchymal transition	7	1.06545	0.00109367	TGFBR3, BMP2, NOTCH1, HMGA2, SNAI2, SOX9, LOXL2	594	34	16792	5.82016	0.975937	0.0631361	0.0619126
GOTERM_BP_DIRECT	GO:0001501~skeletal system development	14	2.1309	0.00113539	CDKN1C, KLF10, VDR, IGFBP4, ZBTB16, COL12A1, ETS2, PTHLH, EXT1, BMP2, CDH11, SH3PXD2B, SOX9, EPHA2	594	137	16792	2.88884	0.979128	0.0638075	0.062571
GOTERM_BP_DIRECT	GO:0035556~intracellular signal transduction	28	4.2618	0.00115439	TRAF3IP2, MAST4, LRRK2, PRKAG2, CXCL1, TREM1, FYB, NUDT4, SDCBP, RAB40B, RPS6KA5, NUAK2, RASSF5, RPS6KA2, APBB2, PAG1, TNS1, EDN1, DUSP1, ACOT11, NRG1, TGFBR3, SPSB1, SIK1, TSSK3, TNIK, ZP3, SGK1	594	403	16792	1.96412	0.980437	0.0638075	0.062571
GOTERM_BP_DIRECT	GO:2000353~positive regulation of endothelial cell apoptotic process	5	0.761035	0.0011615	COL18A1, RGCC, AKR1C3, FOXO3, THBS1	594	14	16792	10.0962	0.980906	0.0638075	0.062571
GOTERM_BP_DIRECT	GO:0071230~cellular response to amino acid stimulus	8	1.21766	0.00121785	CEBPB, SESN3, PDGFD, SESN1, COL4A6, CAPN2, EGFR, BCL2L1	594	47	16792	4.81181	0.984244	0.0658412	0.0645654
GOTERM_BP_DIRECT	GO:0050918~positive chemotaxis	7	1.06545	0.00128109	SEMA5A, NRP1, ANGPT1, HMGB2, TSC2, HMGB1, MET	594	35	16792	5.65387	0.987301	0.0681782	0.0668571
KEGG_PATHWAY	hsa04390:Hippo signaling pathway	16	2.43531	0.0013106	SMAD3, FZD4, WNT7B, BMP8A, WNT7A, PPP2R2A, WNT9A, GDF5, YWHAZ, BMP2, FRMD6, DLG4, ID1, SNAI2, AJUBA, TP73	284	151	6879	2.56655	0.2767	0.0385277	0.0363527
GOTERM_BP_DIRECT	GO:0034616~response to laminar fluid shear stress	4	0.608828	0.00137888	ABCA1, ADAM9, ETS1, SMAD7	594	7	16792	16.1539	0.990902	0.0722533	0.0708532
GOTERM_CC_DIRECT	GO:0031982~vesicle	13	1.97869	0.0013943	ANXA1, ANXA2, IFNGR1, ECE1, STX10, CORO1C, BASP1, ALDH3B1, FLOT2, STOM, RAB38, KCNN4, SYBU	620	128	18224	2.98528	0.446557	0.0311149	0.0292803
KEGG_PATHWAY	hsa04668:TNF signaling pathway	13	1.97869	0.00139818	JUN, EDN1, CEBPB, JAG1, CSF2, PIK3R3, CXCL1, FOS, CX3CL1, RPS6KA5, IL1B, BCL3, BIRC3	284	107	6879	2.94284	0.292199	0.0385277	0.0363527
GOTERM_CC_DIRECT	GO:0005654~nucleoplasm	123	18.7215	0.00150283	EHF, PID1, MAML2, PWWP2B, CBLB, PPP2R2A, HR, PRDM1, AHR, ETS1, ETS2, LOXL2, NR3C2, ELK3, NIPAL4, RPS6KA5, TRIM29, RPS6KA2, ZC3H12A, NAMPT, SOX9, NFRKB, SYBU, TLE3, FBXW7, USP2, RUNX2, RUNX1, CDC25B, TNIK, FKBP5, KHDRBS3, NOTCH1, EPAS1, NEDD4L, ITPR3, FOXO3, FOXO1, HRH1, HIVEP2, RREB1, PPARGC1A, GRIA3, PLK3, PHC2, JUN, SMAD3, VDR, NEK6, PHF12, HMGA2, NR1D2, NR1D1, FANCE, FBXO32, ELL2, SSH1, SMAD7,…	620	2784	18224	1.29864	0.471483	0.03186	0.0299815
GOTERM_BP_DIRECT	GO:0042981~regulation of apoptotic process	18	2.73973	0.00151423	DUSP1, BMP8A, ACTN4, ETS1, GDF5, NDRG1, RTN4, TRAF4, RASSF5, CASP4, BCL3, SOX9, SGK1, CARD14, TNFRSF21, BIRC3, BCL2L1, TP73	594	213	16792	2.38896	0.994266	0.0781435	0.0766293
GOTERM_MF_DIRECT	GO:0043236~laminin binding	6	0.913242	0.00153524	ITGA3, ITGA2, ADAM9, ITGA6, LYPD5, THBS1	592	25	16881	6.84365	0.736881	0.078478	0.0762202
GOTERM_BP_DIRECT	GO:0071560~cellular response to transforming growth factor beta stimulus	8	1.21766	0.00156536	EDN1, PDGFD, CAV1, WNT7A, SOX9, PPARGC1A, ZFP36L1, SMAD7	594	49	16792	4.61541	0.995184	0.0795761	0.0780341
GOTERM_BP_DIRECT	GO:0000188~inactivation of MAPK activity	6	0.913242	0.00159513	DUSP4, DUSP5, DUSP10, DUSP1, CAV1, DUSP6	594	25	16792	6.78465	0.995649	0.0798971	0.0783489
GOTERM_BP_DIRECT	GO:2001240~negative regulation of extrinsic apoptotic signaling pathway in absence of ligand	7	1.06545	0.00172855	CSF2, IL1B, EYA4, SNAI2, NRG1, CX3CL1, BCL2L1	594	37	16792	5.34826	0.99724	0.0853255	0.0836721
GOTERM_BP_DIRECT	GO:0034599~cellular response to oxidative stress	9	1.36986	0.00178918	NR4A2, LRRK2, ALDH3B1, ZC3H12A, SLC11A2, FOXO3, CPEB2, PPARGC1A, FOXO1	594	64	16792	3.97538	0.997756	0.0858302	0.084167
GOTERM_BP_DIRECT	GO:0032436~positive regulation of proteasomal ubiquitin-dependent protein catabolic process	9	1.36986	0.00178918	RNF144B, DAB2, PLK2, LRRK2, MDM2, RNF19B, TRIB1, TRIB2, SMAD7	594	64	16792	3.97538	0.997756	0.0858302	0.084167
GOTERM_MF_DIRECT	GO:0016491~oxidoreductase activity	17	2.58752	0.0018408	EGLN3, ALDH1L1, MAOA, SMOX, TXNRD1, AKR1C1, AKR1C3, MICAL2, AKR1C2, HR, OSGIN2, PTGR1, CYP3A5, ALDH3A2, SESN3, GFOD1, ALDH3B1	592	200	16881	2.42379	0.798332	0.0888699	0.0863132
GOTERM_BP_DIRECT	GO:0030336~negative regulation of cell migration	11	1.67428	0.00190757	KANK1, PTPRU, IFITM1, CITED2, ZMYND8, TPM1, SRGAP3, ALOX15B, CX3CL1, RHOB, SMAD7	594	95	16792	3.27329	0.998502	0.0902388	0.0884902
GOTERM_CC_DIRECT	GO:0008305~integrin complex	6	0.913242	0.00193045	ITGA3, ITGB4, ITGA2, ITGB8, ITGA6, ITGAE	620	27	18224	6.5319	0.559262	0.0379018	0.0356671
GOTERM_CC_DIRECT	GO:0005622~intracellular	66	10.0457	0.0019666	BCAR3, DOCK5, DOCK4, CSF2, TRAF3IP2, MAST4, RASL11B, LRRK2, MT1X, CXCL1, RND3, SAT1, TREM1, NUDT4, TRIM8, FGF5, RASGEF1B, TRIM29, RASSF5, CAPN2, TNS1, VAV3, RSPH6A, EDN2, ZFP1, SH2D3C, TBC1D8, TBC1D9, TBC1D2B, ACTN4, RHOC, ATP1B1, MID1, CDC25B, MOB3A, RAB31, TRAF4, DDIT4, RAB38, EPHA2, RHOBTB3, NEDD4L, FBLN1, DENND3, RTN4, STX10, SDCBP, INPP5A, RAB40B, PCBP4, RALGDS, CTNNAL1, PAG1, MAPK4, SMAD3, …	620	1332	18224	1.45644	0.565979	0.0379018	0.0356671
GOTERM_BP_DIRECT	GO:0014068~positive regulation of phosphatidylinositol 3-kinase signaling	9	1.36986	0.00197854	ANGPT1, PDGFD, NEDD4, F2R, IL18, KDR, PDGFA, NRG1, SOX9	594	65	16792	3.91422	0.998824	0.0918871	0.0901065
GOTERM_BP_DIRECT	GO:0003203~endocardial cushion morphogenesis	5	0.761035	0.00199637	BMP2, NOTCH1, HEY1, MDM2, SOX9	594	16	16792	8.83418	0.998893	0.0918871	0.0901065
GOTERM_BP_DIRECT	GO:0071456~cellular response to hypoxia	11	1.67428	0.00206374	EDN1, RGCC, EPAS1, LMNA, MDM2, FOXO3, CPEB2, PPARGC1A, NDRG1, HIPK2, ZFP36L1	594	96	16792	3.2392	0.999121	0.0937214	0.0919053
GOTERM_BP_DIRECT	GO:2000650~negative regulation of sodium ion transmembrane transporter activity	4	0.608828	0.00214847	OSR1, NEDD4, PCSK9, NEDD4L	594	8	16792	14.1347	0.999342	0.0962855	0.0944197
GOTERM_MF_DIRECT	GO:0008013~beta-catenin binding	10	1.52207	0.00224162	NR4A2, KANK1, PTPRU, SMAD3, RGS20, SOX9, KLF4, FOXO3, FOXO1, SMAD7	592	82	16881	3.47746	0.857747	0.102524	0.099575
KEGG_PATHWAY	hsa05218:Melanoma	10	1.52207	0.00235266	FGF5, CDKN1A, CDK6, FGF9, PDGFD, MDM2, PDGFA, PIK3R3, MET, EGFR	284	71	6879	3.41153	0.441104	0.0550796	0.0519703
KEGG_PATHWAY	hsa04810:Regulation of actin cytoskeleton	19	2.89193	0.00244305	VAV3, ITGB4, ITGA3, ITGA2, F2R, PDGFA, PIK3R3, ITGAE, ACTN4, IQGAP2, EGFR, SSH1, FGF5, FGF9, ARPC2, TMSB4X, PDGFD, ITGB8, ITGA6	284	210	6879	2.1915	0.453473	0.0550796	0.0519703
GOTERM_MF_DIRECT	GO:0004713~protein tyrosine kinase activity	13	1.97869	0.00247498	EPHA4, CSF2, NRG1, MERTK, EGFR, FGF5, FGF9, KDR, PTK2B, ABL2, EPHB2, MET, EPHA2	592	133	16881	2.7872	0.883913	0.107538	0.104444
GOTERM_MF_DIRECT	GO:0043565~sequence-specific DNA binding	32	4.87062	0.00266961	CSRNP1, FOXC2, CEBPB, EHF, THRB, NOTCH1, EPAS1, TFCP2L1, FOXO3, ETS1, BACH1, ETS2, FOXO1, NR3C2, ELK3, RXRA, NFIL3, HES1, MSX1, HIVEP2, PPARGC1A, JUN, SMAD3, VDR, NR1D2, FOS, GRHL1, NR4A2, ELF1, KLF5, SNAI2, TP73	592	518	16881	1.76156	0.90202	0.110471	0.107293
GOTERM_BP_DIRECT	GO:0010468~regulation of gene expression	11	1.67428	0.00279455	LBH, CDK6, FAM46A, ZC3H12A, AHR, ATP1B1, PTHLH, TSKU, STK40, ZFP36L1, TP73	594	100	16792	3.10963	0.999927	0.123613	0.121218
KEGG_PATHWAY	hsa04640:Hematopoietic cell lineage	11	1.67428	0.00287179	KITLG, CSF2, IL4R, MME, ITGA3, IL1B, ITGA2, CD7, CD9, ITGA6, CD55	284	87	6879	3.06253	0.50853	0.0593504	0.056
GOTERM_BP_DIRECT	GO:0001938~positive regulation of endothelial cell proliferation	9	1.36986	0.00289891	SEMA5A, NRP1, BMP2, NRP2, JUN, HMGB2, KDR, F3, PGF	594	69	16792	3.68731	0.999949	0.126586	0.124133
GOTERM_BP_DIRECT	GO:0018108~peptidyl-tyrosine phosphorylation	14	2.1309	0.00305305	EPHA4, CSF2, NRG1, MERTK, EGFR, FGF5, EFEMP1, FGF9, KDR, PTK2B, ABL2, EPHB2, MET, EPHA2	594	153	16792	2.58674	0.99997	0.130255	0.127731
GOTERM_MF_DIRECT	GO:0098641~cadherin binding involved in cell-cell adhesion	21	3.19635	0.00310899	ANXA1, ANXA2, FNBP1L, YWHAZ, NDRG1, EGFR, RTN4, FAM129B, PDLIM1, SDCBP, LIMA1, MYO1B, FMNL2, TRIM29, FSCN1, ITGA6, LRRFIP1, PHLDB2, S100A11, PFKP, EPHA2	592	290	16881	2.06489	0.933191	0.122805	0.119272
GOTERM_BP_DIRECT	GO:0007413~axonal fasciculation	5	0.761035	0.00317351	SEMA5A, NRP1, NRCAM, EPHB2, RTN4	594	18	16792	7.8526	0.99998	0.130255	0.127731
GOTERM_BP_DIRECT	GO:0060412~ventricular septum morphogenesis	6	0.913242	0.00317407	TGFBR3, NOTCH1, HEY1, CITED2, HES1, SMAD7	594	29	16792	5.84883	0.99998	0.130255	0.127731
GOTERM_BP_DIRECT	GO:0046627~negative regulation of insulin receptor signaling pathway	6	0.913242	0.00317407	KANK1, PTPRE, PID1, IL1B, GRB10, TSC2	594	29	16792	5.84883	0.99998	0.130255	0.127731
GOTERM_BP_DIRECT	GO:0071300~cellular response to retinoic acid	9	1.36986	0.00317415	ABCA1, FZD4, OSR1, WNT7B, PTK2B, ABL2, SOX9, WNT9A, KLF4	594	70	16792	3.63463	0.99998	0.130255	0.127731
GOTERM_CC_DIRECT	GO:0030027~lamellipodium	14	2.1309	0.00324081	MYO10, DYSF, RAPH1, NEDD9, IQGAP2, SSH1, CORO1C, KITLG, FSCN1, PTK2B, FLOT2, APBB2, AJUBA, EPHA2	620	160	18224	2.57194	0.747498	0.0597436	0.056221
GOTERM_MF_DIRECT	GO:0003707~steroid hormone receptor activity	8	1.21766	0.00325926	NR4A2, RXRA, THRB, PAQR5, VDR, NR1D2, NR1D1, NR3C2	592	56	16881	4.0736	0.941394	0.123143	0.119601
KEGG_PATHWAY	hsa04068:FoxO signaling pathway	14	2.1309	0.00333927	PLK3, CDKN1A, SMAD3, GADD45B, PLK2, PIK3R3, PRKAG2, IRS2, FOXO3, FBXO32, FOXO1, EGFR, MDM2, SGK1	284	134	6879	2.53064	0.562282	0.0625884	0.0590552
GOTERM_BP_DIRECT	GO:0050680~negative regulation of epithelial cell proliferation	8	1.21766	0.00341865	CDKN1C, TGFBR3, CDK6, RGN, PEX2, SOX9, GDF5, MTSS1	594	56	16792	4.03848	0.999991	0.136987	0.134333
GOTERM_BP_DIRECT	GO:0001570~vasculogenesis	8	1.21766	0.00341865	CITED2, FZD4, TIPARP, CAV1, KDR, EPHA2, ZFP36L1, HDAC7	594	56	16792	4.03848	0.999991	0.136987	0.134333
GOTERM_CC_DIRECT	GO:0016323~basolateral plasma membrane	15	2.28311	0.00341987	ANXA1, B4GALT1, ANXA2, ITGA3, CAV1, ATP2B4, TGFA, ATP1B1, EGFR, MYO1D, SLC7A8, DLG4, CA2, FLOT2, ADAM9	620	180	18224	2.44946	0.766018	0.0604177	0.0568553
GOTERM_MF_DIRECT	GO:0044212~transcription regulatory region DNA binding	17	2.58752	0.00343996	FOXC2, JUN, SMAD3, TFEB, HMGB2, AHR, NR1D1, FOS, KLF4, GRHL1, IKZF2, SMAD7, RXRA, BASP1, BCOR, HIVEP2, TP73	592	213	16881	2.27586	0.949937	0.124555	0.120972
KEGG_PATHWAY	hsa05202:Transcriptional misregulation in cancer	16	2.43531	0.00353322	CDKN1A, CEBPB, CSF2, ZBTB16, PDGFA, HMGA2, KLF3, FOXO1, RUNX2, RUNX1, RXRA, NFKBIZ, MDM2, MET, GRIA3, BCL2L1	284	167	6879	2.32065	0.582825	0.0625884	0.0590552
GOTERM_MF_DIRECT	GO:0047086~ketosteroid monooxygenase activity	3	0.456621	0.00358565	AKR1C1, AKR1C3, AKR1C2	592	3	16881	28.5152	0.95591	0.124637	0.121051
GOTERM_BP_DIRECT	GO:0070301~cellular response to hydrogen peroxide	8	1.21766	0.00378125	ANXA1, PDGFD, MDM2, KLF4, ETS1, FOXO1, RHOB, IL18BP	594	57	16792	3.96763	0.999998	0.146762	0.143919
GOTERM_BP_DIRECT	GO:0043401~steroid hormone mediated signaling pathway	8	1.21766	0.00378125	NR4A2, RXRA, THRB, PAQR5, VDR, NR1D2, NR1D1, NR3C2	594	57	16792	3.96763	0.999998	0.146762	0.143919
GOTERM_BP_DIRECT	GO:0030155~regulation of cell adhesion	7	1.06545	0.00379187	LAMA5, LAMA3, IL18, PTK2B, ABL2, SOX9, CYTH1	594	43	16792	4.60199	0.999998	0.146762	0.143919
GOTERM_CC_DIRECT	GO:0030424~axon	17	2.58752	0.00394629	EPHA4, NRP1, NRP2, SEMA6A, MME, LRRK2, LPAR3, DICER1, RAP1GAP, MYO1D, DNM3, ALCAM, CA2, NCS1, PTK2B, EPHB2, TNFRSF21	620	222	18224	2.25086	0.812979	0.0669291	0.0629828
GOTERM_BP_DIRECT	GO:0050900~leukocyte migration	12	1.82648	0.00395454	SLC7A5, B4GALT1, SLC7A8, ANGPT1, ITGA3, CAV1, ITGA6, SLC7A11, ATP1B1, MERTK, TREM1, SLC16A3	594	122	16792	2.78059	0.999999	0.151339	0.148406
GOTERM_BP_DIRECT	GO:0042771~intrinsic apoptotic signaling pathway in response to DNA damage by p53 class mediator	6	0.913242	0.00428563	CDKN1A, IFI16, BCL3, DDIT4, HIPK2, TP73	594	31	16792	5.47149	1	0.162187	0.159044
GOTERM_BP_DIRECT	GO:0070365~hepatocyte differentiation	4	0.608828	0.0043667	ANXA1, ITGA2, E2F7, E2F8	594	10	16792	11.3077	1	0.163439	0.160272
GOTERM_MF_DIRECT	GO:0005509~calcium ion binding	40	6.08828	0.00438449	MCTP1, NOTCH1, RASEF, DYSF, CBLC, FBLN1, CBLB, ITPR3, THBS1, PCDH18, PPP3CA, EFEMP1, PRRG2, DNER, NCS1, S100A13, CAPN2, MAN1A1, SLC25A23, PAMR1, S100A11, CCBE1, ANXA1, JAG1, ANXA2, PCDHGA3, HPCAL1, TBC1D9, SYT14, ACTN4, ALOX15B, RUNX1, PLSCR1, VSNL1, SMOC1, CDH11, S100A6, RGN, FAT2, S100A9	592	717	16881	1.59081	0.978039	0.146543	0.142327
GOTERM_BP_DIRECT	GO:0071407~cellular response to organic cyclic compound	8	1.21766	0.00459323	BMP2, CEBPB, KLF5, TIPARP, IL1B, IL18, RGS20, ITGA6	594	59	16792	3.83313	1	0.170049	0.166754
GOTERM_BP_DIRECT	GO:0048545~response to steroid hormone	5	0.761035	0.00475141	LOX, PAQR5, CA2, MDM2, HMGB2	594	20	16792	7.06734	1	0.17117	0.167853
GOTERM_BP_DIRECT	GO:0019229~regulation of vasoconstriction	5	0.761035	0.00475141	EDN1, HRH1, EDN2, KCNMB4, ECE1	594	20	16792	7.06734	1	0.17117	0.167853
GOTERM_BP_DIRECT	GO:0001755~neural crest cell migration	7	1.06545	0.00477428	SEMA5A, LAMA5, KITLG, SEMA6A, SEMA3C, SEMA4B, CORO1C	594	45	16792	4.39746	1	0.17117	0.167853
GOTERM_BP_DIRECT	GO:0045669~positive regulation of osteoblast differentiation	8	1.21766	0.00504539	IFITM1, BMP2, CEBPB, JAG1, CEBPD, WNT7B, CYR61, RUNX2	594	60	16792	3.76925	1	0.175936	0.172527
GOTERM_BP_DIRECT	GO:0050679~positive regulation of epithelial cell proliferation	8	1.21766	0.00504539	NOTCH1, FGF9, OSR1, ID1, HTRA1, TGFA, SOX9, EGFR	594	60	16792	3.76925	1	0.175936	0.172527
GOTERM_BP_DIRECT	GO:0043065~positive regulation of apoptotic process	21	3.19635	0.00506216	VAV3, EIF2B5, NOTCH1, GADD45B, DUSP1, ZBTB16, DDX20, HMGA2, HMGB1, FOXO3, FOXO1, DUSP6, RHOB, SYCE3, BMP2, ADAMTSL4, RPS6KA2, APBB2, ITGA6, BCL2L1, TP73	594	300	16792	1.97886	1	0.175936	0.172527
GOTERM_BP_DIRECT	GO:0009887~organ morphogenesis	10	1.52207	0.00516875	LFNG, EFNB2, TLE3, COL18A1, NRP1, BMP2, SEMA6A, THRB, ITGA2, PDGFA	594	92	16792	3.07276	1	0.177826	0.17438
GOTERM_BP_DIRECT	GO:0090090~negative regulation of canonical Wnt signaling pathway	14	2.1309	0.00523089	NOTCH1, IGFBP4, CAV1, FOXO3, DKK1, FOXO1, BICC1, DKK3, DAB2, BMP2, RGS20, SNAI2, SOX9, SCYL2	594	163	16792	2.42804	1	0.178164	0.174712
GOTERM_CC_DIRECT	GO:0002116~semaphorin receptor complex	4	0.608828	0.00524687	NRP1, NRP2, PLXNA2, PLXNB2	620	11	18224	10.6886	0.892529	0.0855643	0.0805193
KEGG_PATHWAY	hsa04014:Ras signaling pathway	19	2.89193	0.00532008	ANGPT1, PDGFA, PIK3R3, ETS1, ETS2, EGFR, PGF, FGF5, KITLG, RASA3, FGF9, RASSF5, PDGFD, KDR, ABL2, MET, RALGDS, EPHA2, BCL2L1	284	226	6879	2.03635	0.732214	0.0879586	0.0829932
GOTERM_BP_DIRECT	GO:0003151~outflow tract morphogenesis	7	1.06545	0.00533015	TGFBR3, JUN, SEMA3C, CITED2, NEDD4, HES1, DHRS3	594	46	16792	4.30186	1	0.178798	0.175334
GOTERM_BP_DIRECT	GO:0032496~response to lipopolysaccharide	14	2.1309	0.00550386	JUN, EDN1, NOTCH1, F2R, MGST1, HMGB2, CXCL1, FOS, IL18BP, DUSP10, SLPI, TRIB1, TNFRSF21, TLR2	594	164	16792	2.41324	1	0.178798	0.175334
GOTERM_MF_DIRECT	GO:0070412~R-SMAD binding	5	0.761035	0.0055362	JUN, RGCC, SMAD3, PMEPA1, FOS	592	21	16881	6.78933	0.991968	0.177162	0.172065
GOTERM_BP_DIRECT	GO:0010634~positive regulation of epithelial cell migration	6	0.913242	0.00564982	DOCK5, JUN, ITGA3, ITGA2, SOX9, RREB1	594	33	16792	5.13988	1	0.178798	0.175334
GOTERM_BP_DIRECT	GO:0010718~positive regulation of epithelial to mesenchymal transition	6	0.913242	0.00564982	SDCBP, DAB2, BMP2, NOTCH1, RGCC, SMAD3	594	33	16792	5.13988	1	0.178798	0.175334
GOTERM_BP_DIRECT	GO:0097150~neuronal stem cell population maintenance	5	0.761035	0.00570785	NOTCH1, JAG1, HES1, FOXO3, FOXO1	594	21	16792	6.7308	1	0.178798	0.175334
GOTERM_BP_DIRECT	GO:0048844~artery morphogenesis	5	0.761035	0.00570785	NRP1, FOXC2, HES1, PRDM1, SMAD7	594	21	16792	6.7308	1	0.178798	0.175334
GOTERM_MF_DIRECT	GO:0050786~RAGE receptor binding	4	0.608828	0.00570833	HMGB2, S100A13, HMGB1, S100A9	592	11	16881	10.3692	0.99309	0.177162	0.172065
GOTERM_BP_DIRECT	GO:0048333~mesodermal cell differentiation	4	0.608828	0.00584795	ITGA3, ITGB4, ITGA2, HMGA2	594	11	16792	10.2798	1	0.178798	0.175334
GOTERM_BP_DIRECT	GO:0048711~positive regulation of astrocyte differentiation	4	0.608828	0.00584795	BMP2, NOTCH1, SERPINE2, HES1	594	11	16792	10.2798	1	0.178798	0.175334
GOTERM_BP_DIRECT	GO:0007175~negative regulation of epidermal growth factor-activated receptor activity	4	0.608828	0.00584795	ZFYVE28, ERRFI1, CBLC, CBLB	594	11	16792	10.2798	1	0.178798	0.175334
GOTERM_BP_DIRECT	GO:0050927~positive regulation of positive chemotaxis	4	0.608828	0.00584795	SMAD3, ITGA2, KDR, F3	594	11	16792	10.2798	1	0.178798	0.175334
GOTERM_BP_DIRECT	GO:0003181~atrioventricular valve morphogenesis	4	0.608828	0.00584795	BMP2, NOTCH1, MDM2, CYR61	594	11	16792	10.2798	1	0.178798	0.175334
GOTERM_BP_DIRECT	GO:0051781~positive regulation of cell division	7	1.06545	0.00593195	FGF5, FGF9, IL1B, PDGFD, PDGFA, TGFA, PGF	594	47	16792	4.21033	1	0.178798	0.175334
GOTERM_BP_DIRECT	GO:0045860~positive regulation of protein kinase activity	7	1.06545	0.00593195	CDKN1A, TRAF4, PTK2B, PRKAG2, ZP3, CYR61, CDC25B	594	47	16792	4.21033	1	0.178798	0.175334
GOTERM_CC_DIRECT	GO:0005788~endoplasmic reticulum lumen	15	2.28311	0.00603994	COL18A1, BCHE, WNT7B, COL12A1, PDGFA, WNT7A, THBS1, ADAMTSL1, ADAMTSL4, PDGFD, ARSJ, COL4A6, COL4A5, COL8A1, CTSC	620	192	18224	2.29637	0.923365	0.0948495	0.089257
GOTERM_BP_DIRECT	GO:0006468~protein phosphorylation	28	4.2618	0.00633373	LRRK2, PRKAG2, FYB, RPS6KA5, NUAK2, IRAK2, CDK20, PTK2B, SCYL2, MAPK4, PLK3, PLK2, NEK6, MERTK, HIPK2, CDC25B, TBCK, BMP2, CDK6, TAOK3, TAOK1, SIK1, TSSK3, TNIK, TRIB1, SGK1, TRIB2, STK40	594	456	16792	1.73584	1	0.18874	0.185082
GOTERM_BP_DIRECT	GO:0030182~neuron differentiation	10	1.52207	0.00637259	CEBPB, FZD4, WNT7B, ID1, DDIT4, PCSK9, WNT9A, RUNX2, EPHA2, HIPK2	594	95	16792	2.97572	1	0.18874	0.185082
GOTERM_BP_DIRECT	GO:0050919~negative chemotaxis	6	0.913242	0.00643536	SEMA5A, NRP2, SEMA6A, SEMA3C, SEMA4B, PDGFA	594	34	16792	4.98871	1	0.188955	0.185294
GOTERM_MF_DIRECT	GO:0019904~protein domain specific binding	16	2.43531	0.00661026	ITGA3, NDE1, ZBTB16, HMGB2, DDX20, DIXDC1, RAB27B, IRS2, DICER1, YWHAZ, RUNX2, MYO1D, BASP1, IL1B, NEDD4, BHLHE40	592	208	16881	2.19348	0.99686	0.187335	0.181945
GOTERM_BP_DIRECT	GO:0007264~small GTPase mediated signal transduction	18	2.73973	0.00661546	VAV3, BCAR3, DOCK5, DOCK4, RASL11B, LRRK2, RASEF, SH2D3C, RHOBTB3, RAB27B, RHOC, RND3, ARL4C, RAB40B, RAB31, RASGEF1B, RAB38, RALGDS	594	246	16792	2.06849	1	0.192583	0.188852
GOTERM_BP_DIRECT	GO:0071222~cellular response to lipopolysaccharide	11	1.67428	0.00668327	ABCA1, SBNO2, CEBPB, CSF2, PDE4D, ZC3H12A, HMGB2, ADAM9, NR1D1, TFPI, PPARGC1A	594	113	16792	2.75188	1	0.192604	0.188872
GOTERM_BP_DIRECT	GO:0055114~oxidation-reduction process	34	5.17504	0.00672926	ALDH1L1, CTBP2, HIBADH, MAOA, MGST1, HR, LOXL2, FADS2, SDR16C5, SESN3, ALDH3B1, SESN1, ALOX5, FTH1, SH3PXD2B, EGLN3, SMOX, TXNRD1, AKR1C1, AKR1C3, MICAL2, AKR1C2, OSGIN2, PTGR1, ALOX15B, DHRS3, ALDH3A2, CYP39A1, BMP2, GFOD1, LOX, TBXAS1, DPYD, CYP20A1	594	592	16792	1.62358	1	0.192604	0.188872
GOTERM_MF_DIRECT	GO:0001047~core promoter binding	8	1.21766	0.00687323	NOTCH1, IFI16, HMGA2, KLF4, FOXO3, E2F7, E2F8, RUNX1	592	64	16881	3.5644	0.997505	0.187335	0.181945
GOTERM_MF_DIRECT	GO:0047115~trans-1,2-dihydrobenzene-1,2-diol dehydrogenase activity	3	0.456621	0.00700495	AKR1C1, AKR1C3, AKR1C2	592	4	16881	21.3864	0.997777	0.187335	0.181945
GOTERM_MF_DIRECT	GO:0018636~phenanthrene 9,10-monooxygenase activity	3	0.456621	0.00700495	AKR1C1, AKR1C3, AKR1C2	592	4	16881	21.3864	0.997777	0.187335	0.181945
GOTERM_MF_DIRECT	GO:0005088~Ras guanyl-nucleotide exchange factor activity	11	1.67428	0.00711398	FGF5, KITLG, CSF2, ANGPT1, FGF9, RASGEF1B, DLG4, PDGFA, IRS2, NRG1, EGFR	592	115	16881	2.72754	0.997979	0.187335	0.181945
GOTERM_BP_DIRECT	GO:0071395~cellular response to jasmonic acid stimulus	3	0.456621	0.00712449	AKR1C1, AKR1C3, AKR1C2	594	4	16792	21.202	1	0.194483	0.190714
GOTERM_BP_DIRECT	GO:0072498~embryonic skeletal joint development	3	0.456621	0.00712449	EXT1, OSR1, WNT9A	594	4	16792	21.202	1	0.194483	0.190714
GOTERM_BP_DIRECT	GO:1901203~positive regulation of extracellular matrix assembly	3	0.456621	0.00712449	RGCC, SMAD3, SOX9	594	4	16792	21.202	1	0.194483	0.190714
GOTERM_BP_DIRECT	GO:0043524~negative regulation of neuron apoptotic process	12	1.82648	0.00712754	NR4A2, NRP1, CEBPB, JUN, ANGPT1, F2R, PTK2B, GDF5, PPARGC1A, HIPK2, BCL2L1, TP73	594	132	16792	2.56994	1	0.194483	0.190714
GOTERM_BP_DIRECT	GO:0001503~ossification	9	1.36986	0.00717959	EXT1, FOXC2, IFITM1, CDH11, BMP8A, SOX9, EGFR, RUNX2, RUNX1	594	80	16792	3.1803	1	0.194483	0.190714
GOTERM_BP_DIRECT	GO:0031398~positive regulation of protein ubiquitination	8	1.21766	0.0071946	ANGPT1, FBXW7, RASSF5, CAV1, LRRK2, ADRB2, BIRC3, SMAD7	594	64	16792	3.53367	1	0.194483	0.190714
GOTERM_BP_DIRECT	GO:0030512~negative regulation of transforming growth factor beta receptor signaling pathway	8	1.21766	0.0071946	TGFBR3, SMAD3, FAM89B, RASL11B, CAV1, HTRA1, PMEPA1, SMAD7	594	64	16792	3.53367	1	0.194483	0.190714
GOTERM_BP_DIRECT	GO:0007219~Notch signaling pathway	11	1.67428	0.00753996	FOXC2, BMP2, NOTCH1, JAG1, CDK6, HEY1, MAML2, DNER, SNAI2, HES1, SOX9	594	115	16792	2.70403	1	0.198981	0.195126
GOTERM_BP_DIRECT	GO:0022409~positive regulation of cell-cell adhesion	4	0.608828	0.00759471	MYO10, CITED2, ITGA6, SMAD7	594	12	16792	9.42312	1	0.198981	0.195126
GOTERM_BP_DIRECT	GO:0001706~endoderm formation	4	0.608828	0.00759471	DUSP4, DUSP5, DUSP1, DKK1	594	12	16792	9.42312	1	0.198981	0.195126
GOTERM_BP_DIRECT	GO:0035413~positive regulation of catenin import into nucleus	4	0.608828	0.00759471	SEMA5A, KANK1, SMAD3, EGFR	594	12	16792	9.42312	1	0.198981	0.195126
GOTERM_BP_DIRECT	GO:0043410~positive regulation of MAPK cascade	9	1.36986	0.00772728	BMP2, FGF9, IGFBP4, F2R, TIMP2, KDR, PDGFA, HMGB1, ADRB2	594	81	16792	3.14104	1	0.200909	0.197016
GOTERM_CC_DIRECT	GO:0015629~actin cytoskeleton	16	2.43531	0.0078339	SVIL, DDX58, FHL2, ACTN4, IQGAP2, FYB, MTSS1, ACACA, CORO1C, FAM129B, LIMA1, ARPC2, CDC42EP4, FSCN1, ABL2, SLC16A3	620	218	18224	2.15732	0.964373	0.118628	0.111633
GOTERM_BP_DIRECT	GO:0098609~cell-cell adhesion	19	2.89193	0.00785238	ANXA2, UNC5D, FNBP1L, YWHAZ, NDRG1, RTN4, FAM129B, PDLIM1, SDCBP, LIMA1, MYO1B, FMNL2, TRIM29, FSCN1, LRRFIP1, PHLDB2, S100A11, PFKP, EPHA2	594	271	16792	1.98198	1	0.202615	0.198689
KEGG_PATHWAY	hsa05205:Proteoglycans in cancer	17	2.58752	0.00806629	CDKN1A, FZD4, WNT7B, ITGA2, CAV1, CBLC, WNT7A, PIK3R3, CBLB, ITPR3, WNT9A, THBS1, EGFR, MDM2, KDR, MET, TLR2	284	200	6879	2.05886	0.864726	0.125027	0.117969
GOTERM_BP_DIRECT	GO:0030593~neutrophil chemotaxis	8	1.21766	0.00849337	VAV3, EDN1, EDN2, IL1B, PDE4D, TREM1, S100A9, CX3CL1	594	66	16792	3.42659	1	0.217507	0.213292
GOTERM_MF_DIRECT	GO:0042802~identical protein binding	40	6.08828	0.00881948	GPSM2, COL18A1, FOXC2, SHMT1, LRRK2, FHL2, FBLN1, RNF4, ETS1, THBS1, EGFR, TRIM8, SDCBP, UGP2, UBASH3B, EPHB2, E2F7, KCNJ2, CTSC, BCHE, EPHA4, JUN, PRMT8, PHC2, SMAD3, DDX58, FBXW7, ZBTB16, CAV1, NDE1, USP2, GDF5, YWHAZ, MID1, MTSS1, TPCN1, TRAF4, MDM2, BCL2L1, TP73	592	749	16881	1.52284	0.999546	0.218414	0.21213
GOTERM_MF_DIRECT	GO:0002020~protease binding	10	1.52207	0.00892686	CCBE1, ANXA2, ADAMTSL4, ITGA3, ADRM1, TIMP2, FLOT2, CST6, F3, NFRKB	592	101	16881	2.82329	0.999587	0.218414	0.21213
GOTERM_CC_DIRECT	GO:0045202~synapse	14	2.1309	0.00900805	RGS17, MME, NDE1, SEMA4B, EGFR, ARPC2, DLG4, MDM2, NRCAM, APBB2, DMD, GABRE, CPEB2, CBLN3	620	181	18224	2.27353	0.978436	0.131704	0.123938
GOTERM_MF_DIRECT	GO:0071889~14-3-3 protein binding	5	0.761035	0.0090482	DDIT4, IRS2, SIK1, ZFP36L1, HDAC7	592	24	16881	5.94067	0.999629	0.218414	0.21213
KEGG_PATHWAY	hsa05220:Chronic myeloid leukemia	9	1.36986	0.00904925	CDKN1A, CDK6, CTBP2, MDM2, PIK3R3, CBLC, CBLB, BCL2L1, RUNX1	284	72	6879	3.02773	0.894108	0.126136	0.119015
KEGG_PATHWAY	hsa04512:ECM-receptor interaction	10	1.52207	0.009155	LAMA5, ITGA3, ITGB4, ITGA2, LAMA3, COL4A6, ITGB8, COL4A5, ITGA6, THBS1	284	87	6879	2.78412	0.896863	0.126136	0.119015
GOTERM_BP_DIRECT	GO:0045786~negative regulation of cell cycle	6	0.913242	0.00924615	BMP2, CDK6, RPS6KA2, ETS1, ALOX15B, RHOB	594	37	16792	4.58422	1	0.235018	0.230464
GOTERM_BP_DIRECT	GO:0070374~positive regulation of ERK1 and ERK2 cascade	14	2.1309	0.00932384	NRP1, JUN, ANGPT1, FBXW7, F2R, PDGFA, HMGB1, EGFR, CX3CL1, BMP2, ST5, PDGFD, KDR, PTK2B	594	175	16792	2.26155	1	0.235237	0.230679
GOTERM_MF_DIRECT	GO:0005096~GTPase activator activity	19	2.89193	0.009558	VAV3, RGS17, ERRFI1, DOCK4, JUN, LRRK2, TBC1D8, TSC2, TBC1D9, TBC1D2B, RAP1GAP, ARHGAP21, TBCK, RASA3, CDC42EP4, ARHGDIB, RGS20, SRGAP3, SMAP2	592	279	16881	1.9419	0.999763	0.224484	0.218026
GOTERM_BP_DIRECT	GO:1900025~negative regulation of substrate adhesion-dependent cell spreading	4	0.608828	0.00961712	KANK1, FBLN1, ACTN4, CORO1C	594	13	16792	8.69826	1	0.235654	0.231088
GOTERM_BP_DIRECT	GO:0003198~epithelial to mesenchymal transition involved in endocardial cushion formation	4	0.608828	0.00961712	NOTCH1, HEY1, SNAI2, MSX1	594	13	16792	8.69826	1	0.235654	0.231088
GOTERM_BP_DIRECT	GO:0045019~negative regulation of nitric oxide biosynthetic process	4	0.608828	0.00961712	CAV1, ZC3H12A, RGN, ATP2B4	594	13	16792	8.69826	1	0.235654	0.231088
GOTERM_BP_DIRECT	GO:0060038~cardiac muscle cell proliferation	4	0.608828	0.00961712	TGFBR3, FOXC2, RXRA, NOTCH1	594	13	16792	8.69826	1	0.235654	0.231088
GOTERM_BP_DIRECT	GO:0030178~negative regulation of Wnt signaling pathway	7	1.06545	0.00970314	FGF9, GRB10, TSC2, HMGA2, DKK1, TSKU, DKK3	594	52	16792	3.80549	1	0.236063	0.231489
GOTERM_CC_DIRECT	GO:0005768~endosome	16	2.43531	0.0103225	ANXA1, CALCRL, ANXA2, CAV1, LRRK2, DYSF, ECE1, HMGB1, ADRB2, EGFR, TPCN1, MYO1D, ARPC2, KDR, FLOT2, ATP9A	620	225	18224	2.09021	0.987716	0.14419	0.135688
GOTERM_BP_DIRECT	GO:0030522~intracellular receptor signaling pathway	6	0.913242	0.0103452	NR4A2, THRB, NCOA3, NR1D2, AHR, NR1D1	594	38	16792	4.46358	1	0.249899	0.245057
GOTERM_CC_DIRECT	GO:0005578~proteinaceous extracellular matrix	18	2.73973	0.0105422	COL18A1, CCBE1, WNT7B, WNT7A, FBLN1, WNT9A, CYR61, TGFBR3, ADAMTSL1, EFEMP1, LOX, CRISPLD2, ADAMTS1, SMOC1, TIMP2, COL4A6, COL4A5, ZP3	620	268	18224	1.97419	0.98882	0.14419	0.135688
GOTERM_BP_DIRECT	GO:0055010~ventricular cardiac muscle tissue morphogenesis	5	0.761035	0.0107939	TGFBR3, FOXC2, RXRA, TPM1, SMAD7	594	25	16792	5.65387	1	0.25709	0.252109
GOTERM_BP_DIRECT	GO:0042327~positive regulation of phosphorylation	5	0.761035	0.0107939	SDCBP, GRB10, ITGA6, THBS1, EGFR	594	25	16792	5.65387	1	0.25709	0.252109
GOTERM_BP_DIRECT	GO:0001822~kidney development	9	1.36986	0.0109486	CDKN1C, MME, ADAMTS1, TIPARP, CA2, RGN, PCSK9, PCSK5, TP73	594	86	16792	2.95842	1	0.258965	0.253947
GOTERM_MF_DIRECT	GO:0019871~sodium channel inhibitor activity	3	0.456621	0.0114049	NEDD4, PCSK9, NEDD4L	592	5	16881	17.1091	0.999953	0.253019	0.24574
GOTERM_BP_DIRECT	GO:0060718~chorionic trophoblast cell differentiation	3	0.456621	0.0115972	HTRA1, E2F7, E2F8	594	5	16792	16.9616	1	0.270548	0.265305
GOTERM_BP_DIRECT	GO:0003100~regulation of systemic arterial blood pressure by endothelin	3	0.456621	0.0115972	EDN1, EDN2, ECE1	594	5	16792	16.9616	1	0.270548	0.265305
GOTERM_MF_DIRECT	GO:0050998~nitric-oxide synthase binding	4	0.608828	0.0116464	DNM3, CAV1, ATP2B4, DMD	592	14	16881	8.1472	0.999962	0.253019	0.24574
GOTERM_MF_DIRECT	GO:0035326~enhancer binding	4	0.608828	0.0116464	SMAD3, TIPARP, AHR, SOX9	592	14	16881	8.1472	0.999962	0.253019	0.24574
GOTERM_BP_DIRECT	GO:0045618~positive regulation of keratinocyte differentiation	4	0.608828	0.0119232	NOTCH1, VDR, NCOA3, ALOX15B	594	14	16792	8.07696	1	0.272069	0.266797
GOTERM_BP_DIRECT	GO:0060347~heart trabecula formation	4	0.608828	0.0119232	TGFBR3, HEY1, ADAMTS1, FHL2	594	14	16792	8.07696	1	0.272069	0.266797
GOTERM_BP_DIRECT	GO:0010243~response to organonitrogen compound	4	0.608828	0.0119232	CDKN1A, NNMT, MGST1, TP73	594	14	16792	8.07696	1	0.272069	0.266797
GOTERM_BP_DIRECT	GO:0051091~positive regulation of sequence-specific DNA binding transcription factor activity	10	1.52207	0.0119819	TRIM8, PPP3CA, EDN1, RGCC, DDX58, FZD4, IL1B, HMGA2, PPARGC1A, HIPK2	594	105	16792	2.69232	1	0.272069	0.266797
GOTERM_MF_DIRECT	GO:0048365~Rac GTPase binding	6	0.913242	0.0123698	DOCK4, CAV1, ARHGDIB, SRGAP3, IQGAP2, CORO1C	592	40	16881	4.27728	0.99998	0.262179	0.254637
GOTERM_BP_DIRECT	GO:0048843~negative regulation of axon extension involved in axon guidance	5	0.761035	0.0124076	SEMA5A, NRP1, SEMA6A, SEMA3C, SEMA4B	594	26	16792	5.43642	1	0.27987	0.274447
GOTERM_BP_DIRECT	GO:0007346~regulation of mitotic cell cycle	6	0.913242	0.0128048	CDKN1C, SDCBP, CDKN1A, NEK6, SIK1, TP73	594	40	16792	4.2404	1	0.286929	0.281369
GOTERM_BP_DIRECT	GO:0048010~vascular endothelial growth factor receptor signaling pathway	8	1.21766	0.0134213	VAV3, NRP1, FOXC2, NRP2, KDR, PTK2B, SHB, PGF	594	72	16792	3.14104	1	0.298778	0.292988
GOTERM_MF_DIRECT	GO:0045499~chemorepellent activity	5	0.761035	0.0137613	SEMA5A, SEMA6A, SEMA3C, SEMA4B, NRG1	592	27	16881	5.28059	0.999994	0.284727	0.276536
GOTERM_BP_DIRECT	GO:0030521~androgen receptor signaling pathway	6	0.913242	0.014171	NCOA3, FHL2, PMEPA1, ARID1A, RNF4, PPARGC1A	594	41	16792	4.13698	1	0.313419	0.307346
KEGG_PATHWAY	hsa05410:Hypertrophic cardiomyopathy (HCM)	9	1.36986	0.0143579	ITGA3, ITGB4, ITGA2, TPM1, LMNA, ITGB8, PRKAG2, ITGA6, DMD	284	78	6879	2.79483	0.971903	0.187408	0.176829
GOTERM_BP_DIRECT	GO:0042127~regulation of cell proliferation	14	2.1309	0.0143627	LAMA5, JUN, EGLN3, ANXA1, IL4R, JAG1, NDRG1, SAT1, PTK2B, ABL2, SOX9, SGK1, S100A11, TNFRSF21	594	185	16792	2.1393	1	0.31438	0.308288
GOTERM_BP_DIRECT	GO:0050729~positive regulation of inflammatory response	8	1.21766	0.0144075	ITGA2, IL18, ZP3, ETS1, S100A9, EGFR, CX3CL1, TLR2	594	73	16792	3.09801	1	0.31438	0.308288
GOTERM_BP_DIRECT	GO:0030330~DNA damage response, signal transduction by p53 class mediator	4	0.608828	0.014519	BCL3, FOXO3, NDRG1, E2F7	594	15	16792	7.5385	1	0.31438	0.308288
GOTERM_BP_DIRECT	GO:0001934~positive regulation of protein phosphorylation	11	1.67428	0.0145837	DAB2, BMP2, ANXA2, IL1B, LRRK2, KDR, TNIK, SOX9, CARD14, CYR61, EGFR	594	127	16792	2.44853	1	0.31438	0.308288
GOTERM_CC_DIRECT	GO:0005667~transcription factor complex	14	2.1309	0.0148272	JUN, SMAD3, EPAS1, AHR, FOS, ETS1, BARX2, RUNX2, SMAD7, PDLIM1, AJUBA, E2F7, E2F8, TP73	620	193	18224	2.13217	0.998225	0.19646	0.184876
GOTERM_MF_DIRECT	GO:0005160~transforming growth factor beta receptor binding	6	0.913242	0.0151081	TGFBR3, BMP2, SMAD3, RASL11B, BMP8A, GDF5	592	42	16881	4.0736	0.999998	0.305324	0.29654
GOTERM_BP_DIRECT	GO:0007566~embryo implantation	6	0.913242	0.0156318	VMP1, RXRA, IL1B, FBLN1, IGFBP7, PCSK5	594	42	16792	4.03848	1	0.334856	0.328367
GOTERM_CC_DIRECT	GO:0005903~brush border	7	1.06545	0.0158864	MYO1D, LIMA1, MYO1B, MME, ITPR3, ACTN4, RALGDS	620	60	18224	3.42925	0.998875	0.204117	0.192081
GOTERM_BP_DIRECT	GO:0035116~embryonic hindlimb morphogenesis	5	0.761035	0.0160784	NOTCH1, OSR1, ZBTB16, WNT7A, MSX1	594	28	16792	5.0481	1	0.340142	0.333551
GOTERM_BP_DIRECT	GO:0043388~positive regulation of DNA binding	5	0.761035	0.0160784	ITGA2, HMGB2, HES1, HMGB1, HIPK2	594	28	16792	5.0481	1	0.340142	0.333551
KEGG_PATHWAY	hsa04010:MAPK signaling pathway	19	2.89193	0.016082	DUSP4, DUSP5, JUN, GADD45B, DUSP1, PDGFA, FOS, EGFR, DUSP6, CDC25B, FGF5, PPP3CA, RPS6KA5, DUSP10, FGF9, TAOK3, IL1B, TAOK1, RPS6KA2	284	253	6879	1.81903	0.981767	0.199417	0.18816
GOTERM_BP_DIRECT	GO:0007623~circadian rhythm	8	1.21766	0.0165331	KLF10, JUN, NFIL3, ID1, NAMPT, NR1D1, PPARGC1A, EGFR	594	75	16792	3.0154	1	0.347604	0.340869
GOTERM_BP_DIRECT	GO:0030036~actin cytoskeleton organization	11	1.67428	0.0169338	SDCBP, NUAK2, TMSB4X, FSCN1, PDGFA, ABL2, CXCL1, RND3, MTSS1, SSH1, CORO1C	594	130	16792	2.39202	1	0.352339	0.345511
GOTERM_BP_DIRECT	GO:0031623~receptor internalization	6	0.913242	0.0171897	DNM3, RAB31, CALCRL, CAV1, NEDD4, CD9	594	43	16792	3.94456	1	0.352339	0.345511
GOTERM_BP_DIRECT	GO:0045429~positive regulation of nitric oxide biosynthetic process	6	0.913242	0.0171897	EDN1, SMAD3, IL1B, PTK2B, KLF4, EGFR	594	43	16792	3.94456	1	0.352339	0.345511
GOTERM_BP_DIRECT	GO:0035994~response to muscle stretch	4	0.608828	0.0174089	EDN1, JUN, DMD, FOS	594	16	16792	7.06734	1	0.352339	0.345511
GOTERM_BP_DIRECT	GO:0061036~positive regulation of cartilage development	4	0.608828	0.0174089	BMP2, ZBTB16, SOX9, CYR61	594	16	16792	7.06734	1	0.352339	0.345511
GOTERM_BP_DIRECT	GO:0030097~hemopoiesis	7	1.06545	0.0174824	JAG1, IFI16, ANGPT1, TIPARP, ZBTB16, RUNX2, RUNX1	594	59	16792	3.35399	1	0.352339	0.345511
GOTERM_BP_DIRECT	GO:0043406~positive regulation of MAP kinase activity	7	1.06545	0.0174824	EDN1, KITLG, PDGFD, LRRK2, PDGFA, AJUBA, EGFR	594	59	16792	3.35399	1	0.352339	0.345511
GOTERM_BP_DIRECT	GO:0071549~cellular response to dexamethasone stimulus	5	0.761035	0.018143	ERRFI1, DDIT4, FBXO32, FOXO1, EGFR	594	29	16792	4.87403	1	0.361376	0.354373
GOTERM_BP_DIRECT	GO:0048008~platelet-derived growth factor receptor signaling pathway	5	0.761035	0.018143	CSRNP1, NRP1, TIPARP, PDGFD, PDGFA	594	29	16792	4.87403	1	0.361376	0.354373
GOTERM_MF_DIRECT	GO:0005518~collagen binding	7	1.06545	0.0181576	CCBE1, SMAD3, ITGA3, ITGA2, PDGFA, ADAM9, SMAD7	592	60	16881	3.32677	1	0.358613	0.348296
GOTERM_MF_DIRECT	GO:0004721~phosphoprotein phosphatase activity	6	0.913242	0.0199302	PPP3CA, DUSP10, PTPN12, PHPT1, SSH1, CDC25B	592	45	16881	3.80203	1	0.384874	0.373802
GOTERM_BP_DIRECT	GO:0001933~negative regulation of protein phosphorylation	7	1.06545	0.020319	PID1, ANGPT1, LRRK2, ZC3H12A, FBLN1, PPARGC1A, CORO1C	594	61	16792	3.24402	1	0.381439	0.374048
GOTERM_BP_DIRECT	GO:0060325~face morphogenesis	5	0.761035	0.020365	CSRNP1, CRISPLD2, TIPARP, MSX1, DKK1	594	30	16792	4.71156	1	0.381439	0.374048
GOTERM_BP_DIRECT	GO:0001654~eye development	5	0.761035	0.020365	FGF9, SMOC1, SH3PXD2B, HMGB1, HIPK2	594	30	16792	4.71156	1	0.381439	0.374048
GOTERM_BP_DIRECT	GO:0034504~protein localization to nucleus	5	0.761035	0.020365	ZBTB16, LMNA, MDM2, SOX9, MSX1	594	30	16792	4.71156	1	0.381439	0.374048
GOTERM_BP_DIRECT	GO:2000379~positive regulation of reactive oxygen species metabolic process	5	0.761035	0.020365	CDKN1A, PID1, ZC3H12A, AKR1C3, THBS1	594	30	16792	4.71156	1	0.381439	0.374048
GOTERM_BP_DIRECT	GO:0051017~actin filament bundle assembly	5	0.761035	0.020365	LIMA1, MYO1B, FSCN1, NEDD9, ACTN4	594	30	16792	4.71156	1	0.381439	0.374048
GOTERM_BP_DIRECT	GO:0021915~neural tube development	5	0.761035	0.020365	NOTCH1, SEMA3C, PLXNA2, EPHA2, ZFP36L1	594	30	16792	4.71156	1	0.381439	0.374048
GOTERM_BP_DIRECT	GO:0007204~positive regulation of cytosolic calcium ion concentration	11	1.67428	0.0204885	EDN1, EDN2, DLG4, F2R, PTK2B, ABL2, CXCR4, LPAR3, ITPR3, HMGB1, CD55	594	134	16792	2.32062	1	0.381439	0.374048
GOTERM_BP_DIRECT	GO:0030193~regulation of blood coagulation	4	0.608828	0.0205954	LBH, CAV1, FAM46A, F2R	594	17	16792	6.65161	1	0.381439	0.374048
GOTERM_BP_DIRECT	GO:2000778~positive regulation of interleukin-6 secretion	4	0.608828	0.0205954	IL1B, F2R, IL1RAP, HMGB1	594	17	16792	6.65161	1	0.381439	0.374048
GOTERM_BP_DIRECT	GO:2000811~negative regulation of anoikis	4	0.608828	0.0205954	NOTCH1, CAV1, SNAI2, BCL2L1	594	17	16792	6.65161	1	0.381439	0.374048
GOTERM_BP_DIRECT	GO:0032870~cellular response to hormone stimulus	6	0.913242	0.0206062	JUN, DUSP1, IGFBP7, SIK1, FOS, PGF	594	45	16792	3.76925	1	0.381439	0.374048
GOTERM_BP_DIRECT	GO:0030514~negative regulation of BMP signaling pathway	6	0.913242	0.0206062	NOTCH1, CAV1, HTRA1, DKK1, HIPK2, SMAD7	594	45	16792	3.76925	1	0.381439	0.374048
GOTERM_MF_DIRECT	GO:0046934~phosphatidylinositol-4,5-bisphosphate 3-kinase activity	7	1.06545	0.0210397	FGF5, KITLG, FGF9, PDGFA, IRS2, NRG1, EGFR	592	62	16881	3.21946	1	0.391952	0.380676
GOTERM_CC_DIRECT	GO:0032154~cleavage furrow	6	0.913242	0.0210769	LIMA1, SVIL, NDE1, RHOC, SSH1, RHOB	620	47	18224	3.75237	0.99988	0.262841	0.247344
GOTERM_BP_DIRECT	GO:0006977~DNA damage response, signal transduction by p53 class mediator resulting in cell cycle arrest	7	1.06545	0.0218479	PLK3, CDKN1A, RGCC, PCBP4, PLK2, MDM2, E2F7	594	62	16792	3.1917	1	0.400075	0.392322
GOTERM_BP_DIRECT	GO:0060395~SMAD protein signal transduction	7	1.06545	0.0218479	BMP2, JUN, SMAD3, BMP8A, FOS, GDF5, HIPK2	594	62	16792	3.1917	1	0.400075	0.392322
GOTERM_CC_DIRECT	GO:0016324~apical plasma membrane	18	2.73973	0.0219858	ANXA1, NOTCH1, JAG1, KCNE4, PDE4D, CAV1, SLC11A2, NRG1, RAB27B, ADRB2, ATP1B1, OSMR, EGFR, SLC7A5, CD9, FLOT2, TNIK, CD55	620	291	18224	1.81816	0.999919	0.266342	0.250638
GOTERM_MF_DIRECT	GO:0005154~epidermal growth factor receptor binding	5	0.761035	0.0221152	VAV3, PLSCR1, EFEMP1, CBLC, TGFA	592	31	16881	4.59923	1	0.391952	0.380676
GOTERM_BP_DIRECT	GO:0043507~positive regulation of JUN kinase activity	5	0.761035	0.0227472	EPHA4, EDN1, TAOK3, FZD4, PTK2B	594	31	16792	4.55957	1	0.401737	0.393952
GOTERM_BP_DIRECT	GO:0030513~positive regulation of BMP signaling pathway	5	0.761035	0.0227472	NOTCH1, HES1, MSX1, GDF5, CYR61	594	31	16792	4.55957	1	0.401737	0.393952
GOTERM_BP_DIRECT	GO:0042060~wound healing	8	1.21766	0.022799	SMAD3, LOX, TPM1, PDGFA, TGFA, NRG1, EGFR, ELK3	594	80	16792	2.82694	1	0.401737	0.393952
GOTERM_MF_DIRECT	GO:0001222~transcription corepressor binding	3	0.456621	0.0228602	FAM89B, PHF12, NR1D1	592	7	16881	12.2208	1	0.391952	0.380676
GOTERM_MF_DIRECT	GO:0004032~alditol:NADP+ 1-oxidoreductase activity	3	0.456621	0.0228602	AKR1C1, AKR1C3, AKR1C2	592	7	16881	12.2208	1	0.391952	0.380676
GOTERM_MF_DIRECT	GO:0005021~vascular endothelial growth factor-activated receptor activity	3	0.456621	0.0228602	NRP1, NRP2, KDR	592	7	16881	12.2208	1	0.391952	0.380676
GOTERM_BP_DIRECT	GO:0035360~positive regulation of peroxisome proliferator activated receptor signaling pathway	3	0.456621	0.0232361	CITED2, LMO3, ALOX15B	594	7	16792	12.1154	1	0.401737	0.393952
GOTERM_BP_DIRECT	GO:0060428~lung epithelium development	3	0.456621	0.0232361	ERRFI1, WNT7B, HMGA2	594	7	16792	12.1154	1	0.401737	0.393952
GOTERM_BP_DIRECT	GO:0048642~negative regulation of skeletal muscle tissue development	3	0.456621	0.0232361	TSC22D3, USP2, DKK1	594	7	16792	12.1154	1	0.401737	0.393952
GOTERM_BP_DIRECT	GO:0002091~negative regulation of receptor internalization	3	0.456621	0.0232361	SDCBP, ANXA2, DLG4	594	7	16792	12.1154	1	0.401737	0.393952
GOTERM_BP_DIRECT	GO:1904628~cellular response to phorbol 13-acetate 12-myristate	3	0.456621	0.0232361	CDK6, ZC3H12A, ZFP36L1	594	7	16792	12.1154	1	0.401737	0.393952
GOTERM_BP_DIRECT	GO:0030050~vesicle transport along actin filament	3	0.456621	0.0232361	MLPH, ACTN4, FNBP1L	594	7	16792	12.1154	1	0.401737	0.393952
GOTERM_BP_DIRECT	GO:0060710~chorio-allantoic fusion	3	0.456621	0.0232361	WNT7B, CYR61, ZFP36L1	594	7	16792	12.1154	1	0.401737	0.393952
GOTERM_BP_DIRECT	GO:0002315~marginal zone B cell differentiation	3	0.456621	0.0232361	LFNG, BCL3, PTK2B	594	7	16792	12.1154	1	0.401737	0.393952
KEGG_PATHWAY	hsa04320:Dorso-ventral axis formation	5	0.761035	0.0233227	NOTCH1, ETS1, CPEB2, ETS2, EGFR	284	27	6879	4.48552	0.997059	0.275429	0.259881
GOTERM_BP_DIRECT	GO:0050727~regulation of inflammatory response	7	1.06545	0.0234526	SBNO2, ANXA1, CASP4, ZYX, NR1D2, MGLL, BIRC3	594	63	16792	3.14104	1	0.402037	0.394247
GOTERM_MF_DIRECT	GO:0005520~insulin-like growth factor binding	4	0.608828	0.0235418	CRIM1, HTRA1, IGFBP7, CYR61	592	18	16881	6.33671	1	0.391952	0.380676
GOTERM_MF_DIRECT	GO:0004745~retinol dehydrogenase activity	4	0.608828	0.0235418	SDR16C5, BMP2, AKR1C3, DHRS3	592	18	16881	6.33671	1	0.391952	0.380676
GOTERM_BP_DIRECT	GO:0006469~negative regulation of protein kinase activity	9	1.36986	0.0238363	TAOK3, GADD45B, UBASH3B, RGN, TSC2, PRKAG2, SHB, TRIB1, TRIB2	594	99	16792	2.56994	1	0.402037	0.394247
GOTERM_MF_DIRECT	GO:0005102~receptor binding	21	3.19635	0.023905	ABCA1, ANXA1, TRAF3IP2, SERPINE2, IGFBP4, CAV1, F2R, LAMA3, WNT7A, CXCL1, NRG1, FYB, CX3CL1, MTSS1, BMP2, ALCAM, PTK2B, ITGB8, ABL2, EPHB2, SCYL2	592	353	16881	1.69637	1	0.391952	0.380676
GOTERM_BP_DIRECT	GO:2000249~regulation of actin cytoskeleton reorganization	4	0.608828	0.0240798	ARHGDIB, PTK2B, ABL2, PHPT1	594	18	16792	6.28208	1	0.402037	0.394247
GOTERM_BP_DIRECT	GO:0006970~response to osmotic stress	4	0.608828	0.0240798	PLK3, TSC22D3, PTK2B, EGFR	594	18	16792	6.28208	1	0.402037	0.394247
GOTERM_BP_DIRECT	GO:0035066~positive regulation of histone acetylation	4	0.608828	0.0240798	RPS6KA5, IL1B, SNAI2, PPARGC1A	594	18	16792	6.28208	1	0.402037	0.394247
GOTERM_BP_DIRECT	GO:0001556~oocyte maturation	4	0.608828	0.0240798	RPS6KA2, PTK2B, FOXO3, CDC25B	594	18	16792	6.28208	1	0.402037	0.394247
GOTERM_BP_DIRECT	GO:0031668~cellular response to extracellular stimulus	4	0.608828	0.0240798	NR4A2, CDKN1A, ITGA6, FOS	594	18	16792	6.28208	1	0.402037	0.394247
GOTERM_CC_DIRECT	GO:0030666~endocytic vesicle membrane	7	1.06545	0.0243544	DLG4, WNT7B, CAV1, MDM2, CD9, WNT7A, GRIA3	620	66	18224	3.1175	0.999971	0.275812	0.25955
GOTERM_CC_DIRECT	GO:0005938~cell cortex	10	1.52207	0.0244179	GPSM2, MYO10, ANXA2, CAV1, NEDD4, USP2, NEDD9, PTK2B, RGS20, FNBP1L	620	123	18224	2.38972	0.999972	0.275812	0.25955
GOTERM_BP_DIRECT	GO:0031100~organ regeneration	6	0.913242	0.0244379	TGFBR3, PTPRU, CDKN1A, NOTCH1, NNMT, PGF	594	47	16792	3.60885	1	0.404055	0.396226
GOTERM_BP_DIRECT	GO:0009267~cellular response to starvation	6	0.913242	0.0244379	KLF10, CAV1, LRRK2, AKR1C3, PCSK9, FOXO1	594	47	16792	3.60885	1	0.404055	0.396226
GOTERM_CC_DIRECT	GO:0016604~nuclear body	5	0.761035	0.024719	ZBTB16, MDM2, HR, RREB1, HIPK2	620	33	18224	4.45357	0.999975	0.275812	0.25955
GOTERM_BP_DIRECT	GO:0045907~positive regulation of vasoconstriction	5	0.761035	0.0252919	HRH1, CAV1, TBXAS1, F2R, EGFR	594	32	16792	4.41709	1	0.412173	0.404186
GOTERM_BP_DIRECT	GO:0035115~embryonic forelimb morphogenesis	5	0.761035	0.0252919	OSR1, WNT7A, MSX1, WNT9A, RUNX2	594	32	16792	4.41709	1	0.412173	0.404186
GOTERM_BP_DIRECT	GO:0001974~blood vessel remodeling	5	0.761035	0.0252919	FOXC2, JAG1, SEMA3C, EPAS1, MDM2	594	32	16792	4.41709	1	0.412173	0.404186
GOTERM_BP_DIRECT	GO:0007411~axon guidance	12	1.82648	0.0256497	EXT1, EFNB2, NRP1, NRP2, RPS6KA5, SEMA6A, SEMA3C, NRXN3, NTN4, APBB2, UNC5D, EPHB2	594	159	16792	2.13354	1	0.416014	0.407953
GOTERM_MF_DIRECT	GO:0001948~glycoprotein binding	7	1.06545	0.0259188	SDCBP, ITGA3, LRRK2, TGFA, SHB, THBS1, EGFR	592	65	16881	3.07087	1	0.415006	0.403067
GOTERM_CC_DIRECT	GO:0016020~membrane	92	14.003	0.0260771	SEMA5A, PYGB, NRP1, DOCK4, IFITM1, NRP2, ITPRIP, B4GALT1, RASL11B, LRMP, ECE1, TFCP2L1, STON2, IL1RAP, SLC7A11, LOXL2, NIPAL4, LFNG, PPP3CA, FADS2, ARHGDIB, FLOT2, MAN1A1, SLC16A3, SLC16A4, CTSC, CERS6, ANXA2, IFNGR1, ACSL1, PCDHGA3, PDE4D, SLC11A2, SH2D3C, DDX56, TBC1D8, HPCAL1, TSC2, EMP1, NRG1, PEX2, FOS, ATP1B1, PGF, TPST2, SLC7A5, PLSCR1, SLC7A8, VSNL1, CDH11, RAB38, ERGIC1, MGLL, FKBP5, SLC…	620	2200	18224	1.22918	0.999986	0.283504	0.266788
KEGG_PATHWAY	hsa04012:ErbB signaling pathway	9	1.36986	0.026121	CDKN1A, JUN, PIK3R3, CBLC, ABL2, TGFA, CBLB, NRG1, EGFR	284	87	6879	2.50571	0.998552	0.286866	0.270672
GOTERM_BP_DIRECT	GO:0048812~neuron projection morphogenesis	6	0.913242	0.0265142	WNT7B, LRRK2, DMD, DICER1, SGK1, EGFR	594	48	16792	3.53367	1	0.427996	0.419703
KEGG_PATHWAY	hsa05223:Non-small cell lung cancer	7	1.06545	0.0266045	RXRA, CDK6, RASSF5, PIK3R3, TGFA, FOXO3, EGFR	284	56	6879	3.02773	0.998719	0.286866	0.270672
GOTERM_CC_DIRECT	GO:1903561~extracellular vesicle	6	0.913242	0.0268167	LFNG, SDCBP, SERPINE2, COL12A1, CD9, ATP1B1	620	50	18224	3.52723	0.99999	0.284257	0.267496
GOTERM_BP_DIRECT	GO:0035019~somatic stem cell population maintenance	7	1.06545	0.0268948	KLF10, EPAS1, WNT7A, HMGA2, HES1, SOX9, KLF4	594	65	16792	3.04439	1	0.432093	0.42372
GOTERM_MF_DIRECT	GO:0019955~cytokine binding	4	0.608828	0.0272453	NRP1, NRP2, FZD4, CXCR4	592	19	16881	6.0032	1	0.415006	0.403067
GOTERM_MF_DIRECT	GO:0004871~signal transducer activity	14	2.1309	0.0276445	PLK2, NEK6, CBLC, CBLB, IRS2, IL1RAP, RHOC, PLCXD2, DKK1, GNAI1, GULP1, PTK2B, ZP3, S100A9	592	204	16881	1.95693	1	0.415006	0.403067
GOTERM_MF_DIRECT	GO:0000287~magnesium ion binding	14	2.1309	0.0276445	PDXK, MAST4, NEK6, GNAI1, RPS6KA5, NUAK2, IMPA2, RPS6KA2, NCS1, ADSSL1, ABL2, SIK1, TSSK3, ATP9A	592	204	16881	1.95693	1	0.415006	0.403067
GOTERM_MF_DIRECT	GO:0003705~transcription factor activity, RNA polymerase II distal enhancer sequence-specific binding	7	1.06545	0.0276989	FOXC2, CEBPB, JUN, BHLHE40, SNAI2, SOX9, VGLL3	592	66	16881	3.02434	1	0.415006	0.403067
GOTERM_BP_DIRECT	GO:0007010~cytoskeleton organization	12	1.82648	0.0277881	LAMA5, SVIL, SEMA6A, FMNL2, MAST4, TPM1, NEDD9, MICAL2, DMD, TNIK, SOX9, AJUBA	594	161	16792	2.10703	1	0.439501	0.430985
GOTERM_BP_DIRECT	GO:0043393~regulation of protein binding	4	0.608828	0.0278618	TGFBR3, PRMT8, ANGPT1, HOPX	594	19	16792	5.95144	1	0.439501	0.430985
GOTERM_BP_DIRECT	GO:0031290~retinal ganglion cell axon guidance	4	0.608828	0.0278618	NRP1, ALCAM, NRCAM, EPHB2	594	19	16792	5.95144	1	0.439501	0.430985
GOTERM_BP_DIRECT	GO:0007050~cell cycle arrest	11	1.67428	0.0279728	CDKN1C, CDKN1A, SMAD3, CDK6, PCBP4, TSC2, PRKAG2, APBB2, IRF6, THBS1, TP73	594	141	16792	2.20541	1	0.439501	0.430985
GOTERM_BP_DIRECT	GO:0045747~positive regulation of Notch signaling pathway	5	0.761035	0.0280011	LFNG, NOTCH1, JAG1, TSPAN5, HES1	594	33	16792	4.28324	1	0.439501	0.430985
GOTERM_CC_DIRECT	GO:0031232~extrinsic component of external side of plasma membrane	3	0.456621	0.028152	ANXA1, SERPINE2, PCSK9	620	8	18224	11.0226	0.999994	0.291133	0.273967
GOTERM_CC_DIRECT	GO:0005794~Golgi apparatus	41	6.24049	0.0291206	EHF, B4GALT1, MAML2, LRRK2, NEDD9, PCSK9, PCSK5, PTHLH, ARHGAP21, DUSP10, LIPG, DSE, NCS1, KDR, CAPN2, MAN1A1, SCYL2, KCNJ2, ABCA1, EPHA4, ST8SIA1, GALNT2, F2R, TSC2, GRHL1, DNM3, TPST2, EXT1, PLSCR1, KLF5, ARPC2, NEDD4, ID1, BHLHE40, CPE, RAB38, SPRY1, ZP3, CBLN3, TLR2, TP73	620	863	18224	1.39645	0.999996	0.29398	0.276646
GOTERM_MF_DIRECT	GO:0016655~oxidoreductase activity, acting on NAD(P)H, quinone or similar compound as acceptor	3	0.456621	0.0297817	AKR1C1, AKR1C3, AKR1C2	592	8	16881	10.6932	1	0.438649	0.426029
BIOCARTA	h_etsPathway:METS affect on Macrophage Differentiation	5	0.761035	0.0299167	JUN, DDX20, FOS, ETS1, ETS2	112	18	1625	4.03026	0.997155	1	1
GOTERM_BP_DIRECT	GO:0044598~doxorubicin metabolic process	3	0.456621	0.0302653	AKR1C1, AKR1C3, AKR1C2	594	8	16792	10.601	1	0.466425	0.457387
GOTERM_BP_DIRECT	GO:0044597~daunorubicin metabolic process	3	0.456621	0.0302653	AKR1C1, AKR1C3, AKR1C2	594	8	16792	10.601	1	0.466425	0.457387
GOTERM_BP_DIRECT	GO:0030850~prostate gland development	3	0.456621	0.0302653	ANXA1, SOX9, ALOX15B	594	8	16792	10.601	1	0.466425	0.457387
GOTERM_BP_DIRECT	GO:0060155~platelet dense granule organization	3	0.456621	0.0302653	ABCA1, F2R, RAB38	594	8	16792	10.601	1	0.466425	0.457387
GOTERM_BP_DIRECT	GO:0007275~multicellular organism development	28	4.2618	0.0305067	EHF, NOTCH1, SPATA6, LBH, PDGFD, ARHGDIB, CDK20, HIVEP2, RREB1, TGIF1, PHC2, JAG1, GADD45B, FZD4, PAQR5, WNT7B, EYA4, HMGA2, EMP1, WNT9A, GRHL1, KLF3, DKK3, VANGL1, MN1, DAB2, TSSK3, EPHA2	594	521	16792	1.51927	1	0.466425	0.457387
GOTERM_BP_DIRECT	GO:0008544~epidermis development	8	1.21766	0.0305381	ALDH3A2, LAMA3, EMP1, FLOT2, GRHL1, CST6, PTHLH, ZNF750	594	85	16792	2.66065	1	0.466425	0.457387
GOTERM_BP_DIRECT	GO:0048286~lung alveolus development	5	0.761035	0.0308765	ERRFI1, EDN2, PDGFA, STK40, HOPX	594	34	16792	4.15726	1	0.467132	0.45808
GOTERM_BP_DIRECT	GO:0043588~skin development	5	0.761035	0.0308765	FRAS1, ITGA3, ITGB4, PDGFA, ITGA6	594	34	16792	4.15726	1	0.467132	0.45808
GOTERM_CC_DIRECT	GO:0031410~cytoplasmic vesicle	15	2.28311	0.0309189	NRP1, ARRDC2, CAV1, LRRK2, MYOF, SLC11A2, CXCR4, TGFA, FNBP1L, MYO1D, ADAMTS1, ARHGDIB, FLOT2, PHLDA1, SYBU	620	235	18224	1.87618	0.999998	0.304082	0.286152
GOTERM_BP_DIRECT	GO:0010506~regulation of autophagy	6	0.913242	0.0309959	VMP1, IFI16, LRRK2, ABL2, HMGB1, SOGA1	594	50	16792	3.39232	1	0.467132	0.45808
GOTERM_MF_DIRECT	GO:0031267~small GTPase binding	4	0.608828	0.0312403	ABCA1, ERRFI1, TSC2, RNF152	592	20	16881	5.70304	1	0.442269	0.429545
GOTERM_MF_DIRECT	GO:0030332~cyclin binding	4	0.608828	0.0312403	CDKN1A, CDK6, FBXW7, USP2	592	20	16881	5.70304	1	0.442269	0.429545
GOTERM_MF_DIRECT	GO:0008270~zinc ion binding	54	8.21918	0.0315543	CPM, THRB, ZMYND8, FHL2, RNF19B, CBLC, MT1X, CBLB, CHD3, ZCCHC14, NR3C2, ADAMTSL1, TRIM8, ADAMTS1, TRIM29, CA2, RNF152, MME, DDX58, LIMCH1, LMO3, PEX2, PTGR1, MID1, RNF144B, TRAF4, S100A6, RGN, S100A9, AJUBA, BIRC3, PDXK, MYNN, RNF4, PDLIM1, LIMA1, RXRA, S100A13, DMD, PHC2, SMAD3, VDR, PHF12, MICAL2, NR1D2, NR1D1, KLF4, NR4A2, SH3RF2, CPD, MDM2, ZYX, CPE, TAF3	592	1169	16881	1.31721	1	0.442269	0.429545
GOTERM_CC_DIRECT	GO:0005887~integral component of plasma membrane	62	9.43683	0.0315556	PTPRU, CD82, LRMP, IL1RAP, SLC7A11, FADS2, GPR176, ALCAM, KDR, NRCAM, EPHB2, SLC16A3, SLC16A4, GPR39, EPHA4, SEMA6A, IL4R, MME, IFNGR1, SLC11A2, F2R, KCNK15, NRG1, IL17RE, TGFBR3, SLC7A5, PLSCR1, SLC7A8, MET, TNFRSF21, EPHA2, TLR2, SLC22A3, CALCRL, NRXN3, TGFA, LPAR3, ITPR3, ADRB2, EFNB2, HRH1, PRRG2, PLXNA2, KCNMB4, TSPAN5, STOM, PAG1, KCNJ2, CD55, SLC38A4, ABCA1, JAG1, TRPA1, KLRC2, FZD4, CAV1,…	620	1415	18224	1.28792	0.999999	0.304082	0.286152
GOTERM_BP_DIRECT	GO:0017015~regulation of transforming growth factor beta receptor signaling pathway	4	0.608828	0.0319401	SMAD3, ITGA3, DKK3, SMAD7	594	20	16792	5.65387	1	0.472991	0.463826
GOTERM_BP_DIRECT	GO:1902895~positive regulation of pri-miRNA transcription from RNA polymerase II promoter	4	0.608828	0.0319401	BMP2, JUN, SMAD3, FOS	594	20	16792	5.65387	1	0.472991	0.463826
GOTERM_BP_DIRECT	GO:0071385~cellular response to glucocorticoid stimulus	4	0.608828	0.0319401	EDN1, ANXA1, HEY1, ZFP36L1	594	20	16792	5.65387	1	0.472991	0.463826
GOTERM_BP_DIRECT	GO:0071375~cellular response to peptide hormone stimulus	4	0.608828	0.0319401	EDN1, CAV1, MDM2, ZFP36L1	594	20	16792	5.65387	1	0.472991	0.463826
KEGG_PATHWAY	hsa05166:HTLV-I infection	18	2.73973	0.032174	NRP1, CDKN1A, JUN, SMAD3, CSF2, FZD4, WNT7B, PDGFA, WNT7A, PIK3R3, FOS, WNT9A, ETS1, ETS2, POLE4, PPP3CA, MSX1, BCL2L1	284	254	6879	1.71651	0.99969	0.332464	0.313696
GOTERM_BP_DIRECT	GO:0001764~neuron migration	9	1.36986	0.0324086	NR4A2, NRP1, SEMA6A, ITGA3, NDE1, DNER, DDIT4, NRCAM, APBB2	594	105	16792	2.42309	1	0.476318	0.467088
GOTERM_BP_DIRECT	GO:0007568~aging	12	1.82648	0.0324445	CDKN1C, EIF2B5, JUN, PDE4D, RGN, TIMP2, DMD, FOS, FOXO3, PPARGC1A, CTSC, LOXL2	594	165	16792	2.05595	1	0.476318	0.467088
GOTERM_MF_DIRECT	GO:0070491~repressing transcription factor binding	5	0.761035	0.0330074	ZMYND8, DDX20, HMGB1, RUNX2, HDAC7	592	35	16881	4.0736	1	0.455293	0.442195
GOTERM_BP_DIRECT	GO:0019722~calcium-mediated signaling	6	0.913242	0.0334041	EDN1, EDN2, MCTP1, LRRK2, CXCR4, NUDT4	594	51	16792	3.32581	1	0.488301	0.478839
GOTERM_BP_DIRECT	GO:0048015~phosphatidylinositol-mediated signaling	9	1.36986	0.0340177	FGF5, KITLG, FGF9, NCS1, PDGFA, IRS2, NRG1, ZP3, EGFR	594	106	16792	2.40023	1	0.495146	0.485551
BIOCARTA	h_egfr_smrtePathway:Map Kinase Inactivation of SMRT Corepressor	4	0.608828	0.034188	RXRA, THRB, ZBTB16, EGFR	112	11	1625	5.27597	0.998786	1	1
GOTERM_BP_DIRECT	GO:0007166~cell surface receptor signaling pathway	17	2.58752	0.0346254	IFITM1, EDN1, ANXA1, EDN2, SEMA6A, CALCRL, CD82, TRPA1, CBLC, CBLB, ADRB2, MERTK, EGFR, CD9, PTK2B, MET, BIRC3	594	274	16792	1.75394	1	0.501848	0.492123
GOTERM_MF_DIRECT	GO:0004879~RNA polymerase II transcription factor activity, ligand-activated sequence-specific DNA binding	5	0.761035	0.0361405	NR4A2, RXRA, NR1D2, AHR, NR1D1	592	36	16881	3.96044	1	0.49072	0.476603
GOTERM_BP_DIRECT	GO:0045987~positive regulation of smooth muscle contraction	4	0.608828	0.0363121	EDN1, EDN2, ITGA2, F2R	594	21	16792	5.38464	1	0.524064	0.513909
GOTERM_BP_DIRECT	GO:0009409~response to cold	5	0.761035	0.0371306	TRPA1, ACOT11, FOS, ADRB2, PPARGC1A	594	36	16792	3.9263	1	0.526349	0.51615
GOTERM_BP_DIRECT	GO:0007565~female pregnancy	8	1.21766	0.0378728	PSG4, ITGA2, NAMPT, FOS, TFCP2L1, ETS1, PTHLH, PGF	594	89	16792	2.54107	1	0.526349	0.51615
GOTERM_BP_DIRECT	GO:0061314~Notch signaling involved in heart development	3	0.456621	0.0380158	NOTCH1, JAG1, HEY1	594	9	16792	9.42312	1	0.526349	0.51615
GOTERM_BP_DIRECT	GO:1904262~negative regulation of TORC1 signaling	3	0.456621	0.0380158	SESN3, SESN1, RNF152	594	9	16792	9.42312	1	0.526349	0.51615
GOTERM_BP_DIRECT	GO:0021675~nerve development	3	0.456621	0.0380158	NRP1, NRP2, DICER1	594	9	16792	9.42312	1	0.526349	0.51615
GOTERM_BP_DIRECT	GO:1901522~positive regulation of transcription from RNA polymerase II promoter involved in cellular response to chemical stimulus	3	0.456621	0.0380158	BMP2, RXRA, RUNX2	594	9	16792	9.42312	1	0.526349	0.51615
GOTERM_BP_DIRECT	GO:0042448~progesterone metabolic process	3	0.456621	0.0380158	AKR1C1, AKR1C3, AKR1C2	594	9	16792	9.42312	1	0.526349	0.51615
GOTERM_BP_DIRECT	GO:1904754~positive regulation of vascular associated smooth muscle cell migration	3	0.456621	0.0380158	DOCK5, DOCK4, MDM2	594	9	16792	9.42312	1	0.526349	0.51615
GOTERM_BP_DIRECT	GO:0033673~negative regulation of kinase activity	3	0.456621	0.0380158	CDKN1C, IRS2, AJUBA	594	9	16792	9.42312	1	0.526349	0.51615
GOTERM_BP_DIRECT	GO:2000737~negative regulation of stem cell differentiation	3	0.456621	0.0380158	NOTCH1, JAG1, HES1	594	9	16792	9.42312	1	0.526349	0.51615
GOTERM_BP_DIRECT	GO:0030154~cell differentiation	25	3.80518	0.0392779	LAMA5, SLFN5, PTPRU, NOTCH1, CITED2, SHB, SPATA6, ETS2, ELK3, SH3PXD2B, ZC3H12A, RGS20, GADD45B, ANGPT1, OSR1, EYA4, NR1D1, PGF, DUSP6, RHOB, SLC7A5, ELF1, SMOC1, TSSK3, ZNF750	594	462	16792	1.52973	1	0.541622	0.531127
GOTERM_CC_DIRECT	GO:0030141~secretory granule	7	1.06545	0.0397043	IL1B, SCG5, CPE, RAB27B, ZP3, THBS1, PCSK5	620	74	18224	2.78047	1	0.374103	0.352045
GOTERM_BP_DIRECT	GO:0007160~cell-matrix adhesion	8	1.21766	0.0398721	ITGA3, ITGB4, ITGA2, ZYX, ITGB8, ADAM9, ITGA6, LYPD5	594	90	16792	2.51283	1	0.547598	0.536987
GOTERM_BP_DIRECT	GO:0007162~negative regulation of cell adhesion	5	0.761035	0.0405105	SEMA5A, ANGPT1, ARHGDIB, PLXNB2, FBLN1	594	37	16792	3.82018	1	0.554065	0.543329
GOTERM_BP_DIRECT	GO:0060045~positive regulation of cardiac muscle cell proliferation	4	0.608828	0.0409744	TGFBR3, NOTCH1, FGF9, NRG1	594	22	16792	5.13988	1	0.554065	0.543329
GOTERM_BP_DIRECT	GO:0001954~positive regulation of cell-matrix adhesion	4	0.608828	0.0409744	CDK6, NINJ1, PTK2B, DMD	594	22	16792	5.13988	1	0.554065	0.543329
GOTERM_BP_DIRECT	GO:0071356~cellular response to tumor necrosis factor	9	1.36986	0.0409937	EDN1, PID1, ZC3H12A, THBS1, PPARGC1A, CX3CL1, TNFRSF21, IL18BP, ZFP36L1	594	110	16792	2.31295	1	0.554065	0.543329
GOTERM_MF_DIRECT	GO:0019901~protein kinase binding	21	3.19635	0.0420597	ERRFI1, SMAD3, OSR1, CAV1, NEK6, PRKAG2, IRS2, FOXO3, YWHAZ, EGFR, CDC25B, HDAC7, RGCC, TRAF4, NCS1, RGS20, SIK1, MAPK4, BCL2L1, FAM83A, TP73	592	376	16881	1.5926	1	0.537037	0.521587
GOTERM_MF_DIRECT	GO:0004714~transmembrane receptor protein tyrosine kinase activity	5	0.761035	0.042904	KDR, MERTK, MET, EGFR, EPHA2	592	38	16881	3.752	1	0.537037	0.521587
GOTERM_BP_DIRECT	GO:0006367~transcription initiation from RNA polymerase II promoter	11	1.67428	0.0433684	NR4A2, RXRA, NOTCH1, THRB, MAML2, VDR, NR1D2, NR1D1, TAF3, PPARGC1A, NR3C2	594	152	16792	2.04581	1	0.583845	0.572532
GOTERM_CC_DIRECT	GO:0005902~microvillus	6	0.913242	0.0437971	ANGPT1, CA2, LRRK2, FSCN1, PDGFA, IQGAP2	620	57	18224	3.09406	1	0.398008	0.374541
GOTERM_BP_DIRECT	GO:0001942~hair follicle development	5	0.761035	0.0440593	LAMA5, PDGFA, SOX9, DKK1, EGFR	594	38	16792	3.71965	1	0.586395	0.575032
GOTERM_BP_DIRECT	GO:0001657~ureteric bud development	5	0.761035	0.0440593	FOXC2, SMAD3, OSR1, SPRY1, SMAD7	594	38	16792	3.71965	1	0.586395	0.575032
GOTERM_BP_DIRECT	GO:0009653~anatomical structure morphogenesis	8	1.21766	0.0440743	EFNB2, CPM, F2R, EYA4, FSCN1, CST6, CYR61, DKK3	594	92	16792	2.45821	1	0.586395	0.575032
GOTERM_CC_DIRECT	GO:0030426~growth cone	9	1.36986	0.0441188	NRP1, BASP1, ITGA3, LRRK2, FSCN1, TIMP2, PTK2B, APBB2, DICER1	620	116	18224	2.28053	1	0.398008	0.374541
GOTERM_MF_DIRECT	GO:0000978~RNA polymerase II core promoter proximal region sequence-specific DNA binding	20	3.04414	0.0445202	TGIF1, JUN, EHF, CEBPB, SMAD3, CEBPD, RFX2, NR1D1, FOS, PRDM1, GRHL1, ETS2, RUNX2, ELK3, ELF1, KLF5, IFI16, NFIA, E2F8, TP73	592	355	16881	1.60649	1	0.537037	0.521587
GOTERM_MF_DIRECT	GO:0000982~transcription factor activity, RNA polymerase II core promoter proximal region sequence-specific binding	4	0.608828	0.0449456	JUN, FOS, MSX1, ETS1	592	23	16881	4.95917	1	0.537037	0.521587
GOTERM_MF_DIRECT	GO:0043425~bHLH transcription factor binding	4	0.608828	0.0449456	SMAD3, BHLHE40, SOX9, RUNX2	592	23	16881	4.95917	1	0.537037	0.521587
GOTERM_MF_DIRECT	GO:0030215~semaphorin receptor binding	4	0.608828	0.0449456	SEMA5A, SEMA6A, SEMA3C, SEMA4B	592	23	16881	4.95917	1	0.537037	0.521587
GOTERM_MF_DIRECT	GO:0031625~ubiquitin protein ligase binding	17	2.58752	0.045517	CDKN1A, SMAD3, FZD4, FBXW7, PDE4D, USP2, CXCR4, YWHAZ, MID1, FOXO1, EGFR, SMAD7, TRAF4, MDM2, TRIB1, PPARGC1A, TRIB2	592	287	16881	1.68905	1	0.537037	0.521587
GOTERM_MF_DIRECT	GO:0005125~cytokine activity	12	1.82648	0.0456623	EDN1, BMP2, KITLG, CSF2, IL1B, NAMPT, IL18, BMP8A, WNT7A, NRG1, HMGB1, GDF5	592	176	16881	1.94422	1	0.537037	0.521587
GOTERM_MF_DIRECT	GO:0039706~co-receptor binding	3	0.456621	0.0457044	BMP2, LRRK2, DKK1	592	10	16881	8.55456	1	0.537037	0.521587
GOTERM_MF_DIRECT	GO:0005070~SH3/SH2 adaptor activity	6	0.913242	0.0457316	VAV3, BCAR3, SH2D3C, GRB10, SHB, PAG1	592	56	16881	3.0552	1	0.537037	0.521587
KEGG_PATHWAY	hsa04330:Notch signaling pathway	6	0.913242	0.0460563	LFNG, NOTCH1, JAG1, CTBP2, MAML2, HES1	284	48	6879	3.02773	0.999991	0.408019	0.384986
GOTERM_BP_DIRECT	GO:0032725~positive regulation of granulocyte macrophage colony-stimulating factor production	3	0.456621	0.0464281	DDX58, IL1B, IL18	594	10	16792	8.48081	1	0.599319	0.587705
GOTERM_BP_DIRECT	GO:0060174~limb bud formation	3	0.456621	0.0464281	SEMA3C, PLXNA2, SOX9	594	10	16792	8.48081	1	0.599319	0.587705
GOTERM_BP_DIRECT	GO:0003184~pulmonary valve morphogenesis	3	0.456621	0.0464281	NOTCH1, JAG1, HEY1	594	10	16792	8.48081	1	0.599319	0.587705
GOTERM_BP_DIRECT	GO:0010038~response to metal ion	3	0.456621	0.0464281	NEDD4L, MT1X, NDRG1	594	10	16792	8.48081	1	0.599319	0.587705
GOTERM_BP_DIRECT	GO:0014067~negative regulation of phosphatidylinositol 3-kinase signaling	3	0.456621	0.0464281	SERPINE2, TSC2, KLF4	594	10	16792	8.48081	1	0.599319	0.587705
GOTERM_BP_DIRECT	GO:0060055~angiogenesis involved in wound healing	3	0.456621	0.0464281	B4GALT1, ETS1, CX3CL1	594	10	16792	8.48081	1	0.599319	0.587705
GOTERM_BP_DIRECT	GO:0045616~regulation of keratinocyte differentiation	3	0.456621	0.0464281	ERRFI1, GRHL1, ZFP36L1	594	10	16792	8.48081	1	0.599319	0.587705
GOTERM_BP_DIRECT	GO:0001889~liver development	7	1.06545	0.0464534	TGFBR3, JUN, NOTCH1, SMAD3, CITED2, PCSK9, HES1	594	74	16792	2.67413	1	0.599319	0.587705
GOTERM_CC_DIRECT	GO:0002102~podosome	4	0.608828	0.0464785	SVIL, SH3PXD2B, FSCN1, PTPN12	620	24	18224	4.89892	1	0.41056	0.386352
KEGG_PATHWAY	hsa05321:Inflammatory bowel disease (IBD)	7	1.06545	0.0469278	JUN, SMAD3, IL4R, IFNGR1, IL1B, IL18, TLR2	284	64	6879	2.64926	0.999993	0.408019	0.384986
GOTERM_BP_DIRECT	GO:0030199~collagen fibril organization	5	0.761035	0.0477769	FOXC2, ANXA2, LOX, COL12A1, LOXL2	594	39	16792	3.62428	1	0.609469	0.597659
GOTERM_BP_DIRECT	GO:0045668~negative regulation of osteoblast differentiation	5	0.761035	0.0477769	NOTCH1, SMAD3, CDK6, ID1, HDAC7	594	39	16792	3.62428	1	0.609469	0.597659
GOTERM_BP_DIRECT	GO:0001756~somitogenesis	5	0.761035	0.0477769	LFNG, FOXC2, SMAD3, SEMA3C, PLXNA2	594	39	16792	3.62428	1	0.609469	0.597659
GOTERM_BP_DIRECT	GO:0046854~phosphatidylinositol phosphorylation	8	1.21766	0.0485517	FGF5, KITLG, FGF9, IMPA2, PDGFA, IRS2, NRG1, EGFR	594	94	16792	2.4059	1	0.614748	0.602836
GOTERM_BP_DIRECT	GO:0008584~male gonad development	8	1.21766	0.0485517	KITLG, FGF9, CITED2, AKR1C3, HMGB2, HMGA2, SOX9, BCL2L1	594	94	16792	2.4059	1	0.614748	0.602836
GOTERM_MF_DIRECT	GO:0000979~RNA polymerase II core promoter sequence-specific DNA binding	6	0.913242	0.0487481	NR4A2, CEBPB, NFIL3, FOS, RREB1, RUNX2	592	57	16881	3.0016	1	0.564827	0.548578
KEGG_PATHWAY	hsa05214:Glioma	7	1.06545	0.0499962	CDKN1A, CDK6, MDM2, PDGFA, PIK3R3, TGFA, EGFR	284	65	6879	2.6085	0.999997	0.408019	0.384986
KEGG_PATHWAY	hsa05212:Pancreatic cancer	7	1.06545	0.0499962	SMAD3, CDK6, PIK3R3, TGFA, RALGDS, EGFR, BCL2L1	284	65	6879	2.6085	0.999997	0.408019	0.384986
GOTERM_BP_DIRECT	GO:0032922~circadian regulation of gene expression	6	0.913242	0.0502592	NAMPT, BHLHE40, USP2, AHR, NR1D1, PPARGC1A	594	57	16792	2.97572	1	0.634011	0.621725
GOTERM_MF_DIRECT	GO:0016791~phosphatase activity	5	0.761035	0.0503308	DUSP4, DUSP23, DUSP5, DUSP10, SSH1	592	40	16881	3.5644	1	0.575493	0.558937
GOTERM_BP_DIRECT	GO:0048041~focal adhesion assembly	4	0.608828	0.0511511	LAMA5, ITGA2, PTK2B, AJUBA	594	24	16792	4.71156	1	0.638171	0.625804
GOTERM_BP_DIRECT	GO:0030099~myeloid cell differentiation	4	0.608828	0.0511511	CDKN1C, IFI16, ZBTB16, RUNX1	594	24	16792	4.71156	1	0.638171	0.625804
GOTERM_BP_DIRECT	GO:0048870~cell motility	4	0.608828	0.0511511	ITGB4, FSCN1, ETS1, EPHA2	594	24	16792	4.71156	1	0.638171	0.625804
GOTERM_BP_DIRECT	GO:0045184~establishment of protein localization	5	0.761035	0.0516627	DLG4, ITGA2, MDM2, PHLDB2, CORO1C	594	40	16792	3.53367	1	0.640883	0.628464
GOTERM_BP_DIRECT	GO:0030216~keratinocyte differentiation	7	1.06545	0.0517448	NOTCH1, JAG1, ANXA1, AKR1C3, ADAM9, IRF6, EPHA2	594	76	16792	2.60376	1	0.640883	0.628464
KEGG_PATHWAY	hsa05211:Renal cell carcinoma	7	1.06545	0.0531852	JUN, EGLN3, EPAS1, PIK3R3, TGFA, ETS1, MET	284	66	6879	2.56898	0.999999	0.408019	0.384986
GOTERM_BP_DIRECT	GO:0007169~transmembrane receptor protein tyrosine kinase signaling pathway	8	1.21766	0.0533082	CD7, KDR, ABL2, NRG1, MET, PAG1, EGFR, MTSS1	594	96	16792	2.35578	1	0.657854	0.645107
KEGG_PATHWAY	hsa05132:Salmonella infection	8	1.21766	0.0538746	JUN, CSF2, ARPC2, IFNGR1, IL1B, IL18, CXCL1, FOS	284	83	6879	2.33463	0.999999	0.408019	0.384986
GOTERM_BP_DIRECT	GO:0032869~cellular response to insulin stimulus	7	1.06545	0.0545228	ERRFI1, RAB31, PCSK9, IRS2, CPEB2, FOXO1, ZFP36L1	594	77	16792	2.56994	1	0.669676	0.6567
GOTERM_MF_DIRECT	GO:0015278~calcium-release channel activity	3	0.456621	0.0545924	RASA3, TRPA1, ITPR3	592	11	16881	7.77687	1	0.590212	0.573232
GOTERM_MF_DIRECT	GO:0035925~mRNA 3'-UTR AU-rich region binding	3	0.456621	0.0545924	ZC3H12A, CPEB2, ZFP36L1	592	11	16881	7.77687	1	0.590212	0.573232
GOTERM_MF_DIRECT	GO:0035259~glucocorticoid receptor binding	3	0.456621	0.0545924	NR4A2, CEBPB, ETS2	592	11	16881	7.77687	1	0.590212	0.573232
GOTERM_MF_DIRECT	GO:0005003~ephrin receptor activity	3	0.456621	0.0545924	EPHA4, EPHB2, EPHA2	592	11	16881	7.77687	1	0.590212	0.573232
GOTERM_MF_DIRECT	GO:0008201~heparin binding	11	1.67428	0.055014	TGFBR3, NRP1, NRP2, SERPINE2, FGF9, CRISPLD2, ADAMTS1, LIPG, THBS1, CYR61, PGF	592	160	16881	1.96042	1	0.590212	0.573232
GOTERM_BP_DIRECT	GO:0048715~negative regulation of oligodendrocyte differentiation	3	0.456621	0.0554459	NOTCH1, DUSP10, HES1	594	11	16792	7.70983	1	0.669676	0.6567
GOTERM_BP_DIRECT	GO:0001886~endothelial cell morphogenesis	3	0.456621	0.0554459	COL18A1, ID1, MET	594	11	16792	7.70983	1	0.669676	0.6567
GOTERM_BP_DIRECT	GO:0010955~negative regulation of protein processing	3	0.456621	0.0554459	SERPINE2, LRRK2, MDM2	594	11	16792	7.70983	1	0.669676	0.6567
GOTERM_BP_DIRECT	GO:0035970~peptidyl-threonine dephosphorylation	3	0.456621	0.0554459	DUSP4, DUSP5, DUSP1	594	11	16792	7.70983	1	0.669676	0.6567
GOTERM_BP_DIRECT	GO:0030857~negative regulation of epithelial cell differentiation	3	0.456621	0.0554459	OSR1, CAV1, SOX9	594	11	16792	7.70983	1	0.669676	0.6567
KEGG_PATHWAY	hsa05231:Choline metabolism in cancer	9	1.36986	0.0555818	SLC22A3, JUN, PDGFD, TSC2, PDGFA, PIK3R3, FOS, RALGDS, EGFR	284	101	6879	2.15838	0.999999	0.408019	0.384986
GOTERM_BP_DIRECT	GO:0051209~release of sequestered calcium ion into cytosol	5	0.761035	0.0557159	RASA3, TRPA1, F2R, ITPR3, TPCN1	594	41	16792	3.44748	1	0.670559	0.657565
KEGG_PATHWAY	hsa05412:Arrhythmogenic right ventricular cardiomyopathy (ARVC)	7	1.06545	0.0564953	ITGA3, ITGB4, ITGA2, LMNA, ITGB8, ITGA6, DMD	284	67	6879	2.53064	0.999999	0.408019	0.384986
GOTERM_BP_DIRECT	GO:0048709~oligodendrocyte differentiation	4	0.608828	0.0566543	NOTCH1, DUSP10, NRG1, SOX9	594	25	16792	4.5231	1	0.679453	0.666287
KEGG_PATHWAY	hsa04350:TGF-beta signaling pathway	8	1.21766	0.0568051	TGIF1, BMP2, SMAD3, ID1, BMP8A, THBS1, GDF5, SMAD7	284	84	6879	2.30684	0.999999	0.408019	0.384986
KEGG_PATHWAY	hsa05414:Dilated cardiomyopathy	8	1.21766	0.0568051	ITGA3, ITGB4, ITGA2, TPM1, LMNA, ITGB8, ITGA6, DMD	284	84	6879	2.30684	0.999999	0.408019	0.384986
GOTERM_BP_DIRECT	GO:0008286~insulin receptor signaling pathway	7	1.06545	0.0573895	FOXC2, NAMPT, GRB10, PIK3R3, IRS2, SOGA1, FOXO1	594	78	16792	2.53699	1	0.683456	0.670213
GOTERM_BP_DIRECT	GO:0014066~regulation of phosphatidylinositol 3-kinase signaling	7	1.06545	0.0573895	FGF5, KITLG, FGF9, PDGFA, IRS2, NRG1, EGFR	594	78	16792	2.53699	1	0.683456	0.670213
KEGG_PATHWAY	hsa04910:Insulin signaling pathway	11	1.67428	0.0575834	PYGB, TSC2, PIK3R3, CBLC, PRKAG2, FLOT2, IRS2, CBLB, PPARGC1A, FOXO1, ACACA	284	138	6879	1.93073	1	0.408019	0.384986
KEGG_PATHWAY	hsa00340:Histidine metabolism	4	0.608828	0.0595368	ALDH3A2, MAOA, AMDHD1, ALDH3B1	284	22	6879	4.40397	1	0.410142	0.386989
GOTERM_BP_DIRECT	GO:0045740~positive regulation of DNA replication	5	0.761035	0.0599352	JUN, KITLG, CSF2, PDGFA, EGFR	594	42	16792	3.3654	1	0.705239	0.691573
GOTERM_BP_DIRECT	GO:0001541~ovarian follicle development	5	0.761035	0.0599352	LFNG, EIF2B5, CEBPB, KITLG, BCL2L1	594	42	16792	3.3654	1	0.705239	0.691573
GOTERM_BP_DIRECT	GO:0045732~positive regulation of protein catabolic process	6	0.913242	0.0602571	TIPARP, PLK2, NEDD4, NEDD4L, SOX9, FOXO1	594	60	16792	2.82694	1	0.705239	0.691573
GOTERM_BP_DIRECT	GO:0090630~activation of GTPase activity	7	1.06545	0.0603448	TBCK, TBC1D8, TBC1D9, PTK2B, TBC1D2B, EPHA2, CORO1C	594	79	16792	2.50488	1	0.705239	0.691573
GOTERM_MF_DIRECT	GO:0003785~actin monomer binding	4	0.608828	0.0611371	LIMA1, TMSB4X, ABL2, MTSS1	592	26	16881	4.38695	1	0.632591	0.614393
GOTERM_CC_DIRECT	GO:0009897~external side of plasma membrane	13	1.97869	0.0613518	ABCA1, B4GALT1, ITGA3, ITGA2, ECE1, NRG1, ITGAE, THBS1, TGFBR3, ALCAM, CD9, NRCAM, ITGA6	620	213	18224	1.79397	1	0.530881	0.499579
GOTERM_BP_DIRECT	GO:0002053~positive regulation of mesenchymal cell proliferation	4	0.608828	0.0624256	FGF9, PDGFA, IRS2, SOX9	594	26	16792	4.34913	1	0.705239	0.691573
GOTERM_BP_DIRECT	GO:0051491~positive regulation of filopodium assembly	4	0.608828	0.0624256	DNM3, ZMYND8, FSCN1, FNBP1L	594	26	16792	4.34913	1	0.705239	0.691573
GOTERM_BP_DIRECT	GO:0045840~positive regulation of mitotic nuclear division	4	0.608828	0.0624256	EDN1, RGCC, IL1B, TGFA	594	26	16792	4.34913	1	0.705239	0.691573
GOTERM_MF_DIRECT	GO:0046332~SMAD binding	5	0.761035	0.0627032	TGFBR3, DAB2, BMP2, HMGA2, HIPK2	592	43	16881	3.31572	1	0.632591	0.614393
GOTERM_MF_DIRECT	GO:0030971~receptor tyrosine kinase binding	5	0.761035	0.0627032	DOCK4, ANGPT1, CBLC, CBLB, NRG1	592	43	16881	3.31572	1	0.632591	0.614393
GOTERM_MF_DIRECT	GO:0001046~core promoter sequence-specific DNA binding	5	0.761035	0.0627032	KLF10, NR1D2, NR1D1, SOX9, ZNF750	592	43	16881	3.31572	1	0.632591	0.614393
GOTERM_BP_DIRECT	GO:0032092~positive regulation of protein binding	6	0.913242	0.063823	LFNG, BMP2, PLK2, CAV1, LRRK2, HIPK2	594	61	16792	2.78059	1	0.705239	0.691573
GOTERM_BP_DIRECT	GO:0007416~synapse assembly	6	0.913242	0.063823	DNM3, DNER, NRXN3, WNT7A, NRCAM, NRG1	594	61	16792	2.78059	1	0.705239	0.691573
GOTERM_BP_DIRECT	GO:0008104~protein localization	6	0.913242	0.063823	MARVELD1, CAV1, TSC2, NRCAM, TNS4, AKAP2	594	61	16792	2.78059	1	0.705239	0.691573
GOTERM_BP_DIRECT	GO:0006950~response to stress	6	0.913242	0.063823	ERRFI1, DUSP10, GADD45B, PTK2B, SGK1, EGFR	594	61	16792	2.78059	1	0.705239	0.691573
KEGG_PATHWAY	hsa05142:Chagas disease (American trypanosomiasis)	9	1.36986	0.063879	JUN, SMAD3, IFNGR1, IL1B, PIK3R3, PPP2R2A, FOS, GNAI1, TLR2	284	104	6879	2.09612	1	0.422311	0.398471
GOTERM_MF_DIRECT	GO:0000975~regulatory region DNA binding	3	0.456621	0.0640279	HMGA2, IRF6, RUNX1	592	12	16881	7.1288	1	0.632591	0.614393
GOTERM_MF_DIRECT	GO:0031994~insulin-like growth factor I binding	3	0.456621	0.0640279	ITGB4, IGFBP4, ITGA6	592	12	16881	7.1288	1	0.632591	0.614393
GOTERM_MF_DIRECT	GO:0003779~actin binding	16	2.43531	0.0640599	FHOD3, LIMCH1, LRRK2, TPM1, DIXDC1, CXCR4, MICAL2, ACTN4, IQGAP2, SSH1, FMNL2, MLPH, FSCN1, DMD, TNS4, TNS1	592	278	16881	1.64116	1	0.632591	0.614393
GOTERM_BP_DIRECT	GO:0034260~negative regulation of GTPase activity	5	0.761035	0.0643194	LRRK2, RGN, SPRY1, IQGAP2, CPEB2	594	43	16792	3.28713	1	0.705239	0.691573
GOTERM_BP_DIRECT	GO:0045785~positive regulation of cell adhesion	5	0.761035	0.0643194	VAV3, ANGPT1, ITGA2, TPM1, NRG1	594	43	16792	3.28713	1	0.705239	0.691573
GOTERM_BP_DIRECT	GO:1902287~semaphorin-plexin signaling pathway involved in axon guidance	3	0.456621	0.0650161	NRP1, PLXNA2, PLXNB2	594	12	16792	7.06734	1	0.705239	0.691573
GOTERM_BP_DIRECT	GO:0002687~positive regulation of leukocyte migration	3	0.456621	0.0650161	KITLG, ITGA2, ZP3	594	12	16792	7.06734	1	0.705239	0.691573
GOTERM_BP_DIRECT	GO:0071498~cellular response to fluid shear stress	3	0.456621	0.0650161	CA2, PTK2B, MTSS1	594	12	16792	7.06734	1	0.705239	0.691573
GOTERM_BP_DIRECT	GO:0007171~activation of transmembrane receptor protein tyrosine kinase activity	3	0.456621	0.0650161	ANGPT1, NRG1, ADRB2	594	12	16792	7.06734	1	0.705239	0.691573
GOTERM_BP_DIRECT	GO:2000505~regulation of energy homeostasis	3	0.456621	0.0650161	BMP8A, NR1D2, FOXO1	594	12	16792	7.06734	1	0.705239	0.691573
GOTERM_BP_DIRECT	GO:0010717~regulation of epithelial to mesenchymal transition	3	0.456621	0.0650161	PHLDB1, PHLDB2, SMAD7	594	12	16792	7.06734	1	0.705239	0.691573
GOTERM_BP_DIRECT	GO:0060997~dendritic spine morphogenesis	3	0.456621	0.0650161	DLG4, WNT7A, EPHB2	594	12	16792	7.06734	1	0.705239	0.691573
GOTERM_BP_DIRECT	GO:0050678~regulation of epithelial cell proliferation	3	0.456621	0.0650161	SMAD3, HES1, SERPINB5	594	12	16792	7.06734	1	0.705239	0.691573
GOTERM_BP_DIRECT	GO:0042088~T-helper 1 type immune response	3	0.456621	0.0650161	BCL3, IL18, IL18BP	594	12	16792	7.06734	1	0.705239	0.691573
GOTERM_BP_DIRECT	GO:0048846~axon extension involved in axon guidance	3	0.456621	0.0650161	NRP1, NRP2, ALCAM	594	12	16792	7.06734	1	0.705239	0.691573
GOTERM_BP_DIRECT	GO:0060707~trophoblast giant cell differentiation	3	0.456621	0.0650161	PRDM1, E2F7, E2F8	594	12	16792	7.06734	1	0.705239	0.691573
GOTERM_BP_DIRECT	GO:0036066~protein O-linked fucosylation	3	0.456621	0.0650161	ADAMTSL1, ADAMTSL4, THBS1	594	12	16792	7.06734	1	0.705239	0.691573
GOTERM_BP_DIRECT	GO:0031581~hemidesmosome assembly	3	0.456621	0.0650161	ITGB4, LAMA3, ITGA6	594	12	16792	7.06734	1	0.705239	0.691573
GOTERM_BP_DIRECT	GO:0042574~retinal metabolic process	3	0.456621	0.0650161	SDR16C5, AKR1C1, AKR1C3	594	12	16792	7.06734	1	0.705239	0.691573
GOTERM_BP_DIRECT	GO:0060394~negative regulation of pathway-restricted SMAD protein phosphorylation	3	0.456621	0.0650161	PMEPA1, DKK1, SMAD7	594	12	16792	7.06734	1	0.705239	0.691573
GOTERM_CC_DIRECT	GO:0000790~nuclear chromatin	12	1.82648	0.0655341	CEBPB, RXRA, SMAD3, THRB, CITED2, NCOA3, HMGB2, SNAI2, NR1D1, ARID1A, KLF4, RUNX2	620	193	18224	1.82758	1	0.540792	0.508906
KEGG_PATHWAY	hsa04152:AMPK signaling pathway	10	1.52207	0.0661599	TSC2, PIK3R3, PRKAG2, PPP2R2A, IRS2, FOXO3, PPARGC1A, FOXO1, PFKP, ACACA	284	123	6879	1.96925	1	0.422311	0.398471
GOTERM_CC_DIRECT	GO:1990667~PCSK9-AnxA2 complex	2	0.304414	0.0667805	ANXA2, PCSK9	620	2	18224	29.3935	1	0.540792	0.508906
GOTERM_BP_DIRECT	GO:0048863~stem cell differentiation	4	0.608828	0.0684579	OSR1, HMGA2, MSX1, RUNX2	594	27	16792	4.18805	1	0.713961	0.700126
GOTERM_BP_DIRECT	GO:0055007~cardiac muscle cell differentiation	4	0.608828	0.0684579	BMP2, NRG1, SIK1, ARID1A	594	27	16792	4.18805	1	0.713961	0.700126
GOTERM_BP_DIRECT	GO:0032728~positive regulation of interferon-beta production	4	0.608828	0.0684579	DDX58, HMGB2, HMGB1, TLR2	594	27	16792	4.18805	1	0.713961	0.700126
GOTERM_BP_DIRECT	GO:0035987~endodermal cell differentiation	4	0.608828	0.0684579	LAMA3, COL12A1, HMGA2, COL8A1	594	27	16792	4.18805	1	0.713961	0.700126
GOTERM_MF_DIRECT	GO:0005006~epidermal growth factor-activated receptor activity	2	0.304414	0.0687959	EFEMP1, EGFR	592	2	16881	28.5152	1	0.671726	0.652401
GOTERM_BP_DIRECT	GO:0043434~response to peptide hormone	5	0.761035	0.0688666	EIF2B5, BTG1, ANXA1, GNAI1, CD55	594	44	16792	3.21243	1	0.713961	0.700126
GOTERM_BP_DIRECT	GO:0032877~positive regulation of DNA endoreduplication	2	0.304414	0.0693838	E2F7, E2F8	594	2	16792	28.2694	1	0.713961	0.700126
GOTERM_BP_DIRECT	GO:1903243~negative regulation of cardiac muscle hypertrophy in response to stress	2	0.304414	0.0693838	ERRFI1, ATP2B4	594	2	16792	28.2694	1	0.713961	0.700126
GOTERM_BP_DIRECT	GO:0044860~protein localization to plasma membrane raft	2	0.304414	0.0693838	CAV1, FLOT2	594	2	16792	28.2694	1	0.713961	0.700126
GOTERM_BP_DIRECT	GO:0060979~vasculogenesis involved in coronary vascular morphogenesis	2	0.304414	0.0693838	TGFBR3, NOTCH1	594	2	16792	28.2694	1	0.713961	0.700126
GOTERM_BP_DIRECT	GO:0035947~regulation of gluconeogenesis by regulation of transcription from RNA polymerase II promoter	2	0.304414	0.0693838	NR1D1, FOXO1	594	2	16792	28.2694	1	0.713961	0.700126
GOTERM_BP_DIRECT	GO:0035026~leading edge cell differentiation	2	0.304414	0.0693838	DAB2, JUN	594	2	16792	28.2694	1	0.713961	0.700126
GOTERM_BP_DIRECT	GO:0097350~neutrophil clearance	2	0.304414	0.0693838	ANXA1, HMGB1	594	2	16792	28.2694	1	0.713961	0.700126
GOTERM_BP_DIRECT	GO:1904835~dorsal root ganglion morphogenesis	2	0.304414	0.0693838	NRP1, NRP2	594	2	16792	28.2694	1	0.713961	0.700126
GOTERM_BP_DIRECT	GO:1903849~positive regulation of aorta morphogenesis	2	0.304414	0.0693838	EFNB2, NOTCH1	594	2	16792	28.2694	1	0.713961	0.700126
GOTERM_BP_DIRECT	GO:0035711~T-helper 1 cell activation	2	0.304414	0.0693838	CEBPB, HMGB1	594	2	16792	28.2694	1	0.713961	0.700126
GOTERM_BP_DIRECT	GO:0072190~ureter urothelium development	2	0.304414	0.0693838	OSR1, SOX9	594	2	16792	28.2694	1	0.713961	0.700126
GOTERM_BP_DIRECT	GO:0021649~vestibulocochlear nerve structural organization	2	0.304414	0.0693838	NRP1, NRP2	594	2	16792	28.2694	1	0.713961	0.700126
KEGG_PATHWAY	hsa04974:Protein digestion and absorption	8	1.21766	0.0695029	COL18A1, SLC7A8, MME, COL12A1, COL4A6, COL4A5, ATP1B1, KCNN4	284	88	6879	2.20198	1	0.422311	0.398471
KEGG_PATHWAY	hsa05215:Prostate cancer	8	1.21766	0.0695029	CDKN1A, PDGFD, MDM2, PDGFA, PIK3R3, TGFA, FOXO1, EGFR	284	88	6879	2.20198	1	0.422311	0.398471
GOTERM_CC_DIRECT	GO:0005901~caveola	6	0.913242	0.0696119	CAV1, F2R, MYOF, ATP2B4, FLOT2, ATP1B1	620	65	18224	2.71325	1	0.540792	0.508906
KEGG_PATHWAY	hsa05146:Amoebiasis	9	1.36986	0.0698175	LAMA5, CSF2, IL1B, LAMA3, COL4A6, COL4A5, PIK3R3, ACTN4, TLR2	284	106	6879	2.05657	1	0.422311	0.398471
GOTERM_MF_DIRECT	GO:0004674~protein serine/threonine kinase activity	20	3.04414	0.070009	PLK3, MAST4, OSR1, PLK2, LRRK2, NEK6, HIPK2, RPS6KA5, NUAK2, TAOK3, IRAK2, TAOK1, RPS6KA2, CDK20, SIK1, TSSK3, TNIK, SGK1, STK40, MAPK4	592	376	16881	1.51677	1	0.675976	0.656529
GOTERM_CC_DIRECT	GO:0045178~basal part of cell	3	0.456621	0.0701499	EDN1, ITGA2, SLC11A2	620	13	18224	6.78313	1	0.540792	0.508906
GOTERM_CC_DIRECT	GO:0044306~neuron projection terminus	3	0.456621	0.0701499	MME, DLG4, DMD	620	13	18224	6.78313	1	0.540792	0.508906
GOTERM_CC_DIRECT	GO:0097440~apical dendrite	3	0.456621	0.0701499	MYO1D, PTK2B, PPARGC1A	620	13	18224	6.78313	1	0.540792	0.508906
GOTERM_BP_DIRECT	GO:0006955~immune response	22	3.34855	0.0726366	CEBPB, IL4R, NOTCH1, SMAD3, CSF2, SEMA3C, IL18, CXCL1, IL1RAP, ETS1, THBS1, FYB, CX3CL1, TGFBR3, NFIL3, SLPI, IL1B, FTH1, CD7, TNFRSF21, CTSC, TLR2	594	421	16792	1.47726	1	0.740413	0.726066
GOTERM_MF_DIRECT	GO:0035035~histone acetyltransferase binding	4	0.608828	0.0732317	CEBPB, CITED2, EPAS1, ETS1	592	28	16881	4.0736	1	0.691105	0.671222
GOTERM_MF_DIRECT	GO:0044548~S100 protein binding	3	0.456621	0.0739617	ANXA2, S100A6, S100A11	592	13	16881	6.58043	1	0.691105	0.671222
GOTERM_MF_DIRECT	GO:0030898~actin-dependent ATPase activity	3	0.456621	0.0739617	MYO1D, MYO1B, MYO10	592	13	16881	6.58043	1	0.691105	0.671222
GOTERM_BP_DIRECT	GO:0061418~regulation of transcription from RNA polymerase II promoter in response to hypoxia	4	0.608828	0.0747434	EGLN3, EPAS1, HIF3A, BACH1	594	28	16792	4.03848	1	0.740413	0.726066
GOTERM_BP_DIRECT	GO:0003281~ventricular septum development	4	0.608828	0.0747434	MDM2, HES1, PRDM1, CYR61	594	28	16792	4.03848	1	0.740413	0.726066
GOTERM_BP_DIRECT	GO:0045931~positive regulation of mitotic cell cycle	4	0.608828	0.0747434	USP2, MDM2, SHB, CDC25B	594	28	16792	4.03848	1	0.740413	0.726066
GOTERM_BP_DIRECT	GO:2000145~regulation of cell motility	4	0.608828	0.0747434	CDK6, ABL2, NRG1, EGFR	594	28	16792	4.03848	1	0.740413	0.726066
GOTERM_BP_DIRECT	GO:0040007~growth	4	0.608828	0.0747434	BMP2, BMP8A, GDF5, BCL2L1	594	28	16792	4.03848	1	0.740413	0.726066
KEGG_PATHWAY	hsa04960:Aldosterone-regulated sodium reabsorption	5	0.761035	0.0747795	PIK3R3, NEDD4L, ATP1B1, SGK1, NR3C2	284	39	6879	3.10536	1	0.441555	0.416629
GOTERM_BP_DIRECT	GO:0060389~pathway-restricted SMAD protein phosphorylation	3	0.456621	0.0750887	TGFBR3, BMP2, SMAD7	594	13	16792	6.5237	1	0.740413	0.726066
GOTERM_BP_DIRECT	GO:0071850~mitotic cell cycle arrest	3	0.456621	0.0750887	CDKN1A, RGCC, DUSP1	594	13	16792	6.5237	1	0.740413	0.726066
GOTERM_BP_DIRECT	GO:0006518~peptide metabolic process	3	0.456621	0.0750887	CPM, MME, CPD	594	13	16792	6.5237	1	0.740413	0.726066
GOTERM_BP_DIRECT	GO:0006693~prostaglandin metabolic process	3	0.456621	0.0750887	AKR1C3, AKR1C2, PTGR1	594	13	16792	6.5237	1	0.740413	0.726066
GOTERM_BP_DIRECT	GO:0050730~regulation of peptidyl-tyrosine phosphorylation	3	0.456621	0.0750887	PDGFD, PDGFA, EGFR	594	13	16792	6.5237	1	0.740413	0.726066
GOTERM_BP_DIRECT	GO:0051770~positive regulation of nitric-oxide synthase biosynthetic process	3	0.456621	0.0750887	NAMPT, KDR, TLR2	594	13	16792	6.5237	1	0.740413	0.726066
GOTERM_BP_DIRECT	GO:0060425~lung morphogenesis	3	0.456621	0.0750887	WNT7B, ID1, STK40	594	13	16792	6.5237	1	0.740413	0.726066
GOTERM_BP_DIRECT	GO:0072657~protein localization to membrane	3	0.456621	0.0750887	SH3PXD2B, CPE, RAB38	594	13	16792	6.5237	1	0.740413	0.726066
GOTERM_BP_DIRECT	GO:0042632~cholesterol homeostasis	6	0.913242	0.0752152	ABCA1, CAV1, AKR1C1, LIPG, IL18, PCSK9	594	64	16792	2.65025	1	0.740413	0.726066
BIOCARTA	h_tsp1Pathway:TSP-1 Induced Apoptosis in Microvascular Endothelial Cell	3	0.456621	0.0774715	JUN, FOS, THBS1	112	7	1625	6.21811	1	1	1
GOTERM_BP_DIRECT	GO:0006470~protein dephosphorylation	9	1.36986	0.0780566	DUSP5, PPP3CA, PTPRU, PTPRE, DUSP10, PPP2R2A, PTPN12, PHPT1, SSH1	594	126	16792	2.01924	1	0.762834	0.748052
GOTERM_BP_DIRECT	GO:0032729~positive regulation of interferon-gamma production	5	0.761035	0.0784422	IL1B, PDE4D, BCL3, IL18, ZP3	594	46	16792	3.07276	1	0.762834	0.748052
GOTERM_BP_DIRECT	GO:0045165~cell fate commitment	5	0.761035	0.0784422	BMP2, WNT7B, WNT7A, WNT9A, PRDM1	594	46	16792	3.07276	1	0.762834	0.748052
GOTERM_BP_DIRECT	GO:0000186~activation of MAPKK activity	5	0.761035	0.0784422	GADD45B, LRRK2, F2R, ADAM9, EGFR	594	46	16792	3.07276	1	0.762834	0.748052
GOTERM_BP_DIRECT	GO:0051384~response to glucocorticoid	6	0.913242	0.0792419	PTPRU, BCHE, DUSP1, WNT7B, ADAM9, HMGB1	594	65	16792	2.60948	1	0.762834	0.748052
GOTERM_BP_DIRECT	GO:0060326~cell chemotaxis	6	0.913242	0.0792419	SEMA5A, DOCK4, HMGB2, CXCL1, CX3CL1, EPHA2	594	65	16792	2.60948	1	0.762834	0.748052
GOTERM_BP_DIRECT	GO:0043087~regulation of GTPase activity	6	0.913242	0.0792419	VAV3, EPHA4, PLXNB2, IQGAP2, AJUBA, RAP1GAP	594	65	16792	2.60948	1	0.762834	0.748052
GOTERM_BP_DIRECT	GO:0002250~adaptive immune response	10	1.52207	0.0792845	ALCAM, ANXA1, NEDD4, CD7, TFEB, PTK2B, RNF19B, PRDM1, PAG1, TNFRSF21	594	148	16792	1.91009	1	0.762834	0.748052
GOTERM_BP_DIRECT	GO:0009636~response to toxic substance	7	1.06545	0.0799413	CDKN1A, SLC7A8, MDM2, FOS, AHR, SLC7A11, TLR2	594	85	16792	2.32806	1	0.766986	0.752124
GOTERM_CC_DIRECT	GO:0031234~extrinsic component of cytoplasmic side of plasma membrane	6	0.913242	0.0810574	ERRFI1, DLG4, S100A6, PTK2B, ABL2, CYTH1	620	68	18224	2.59355	1	0.61372	0.577534
GOTERM_BP_DIRECT	GO:0042149~cellular response to glucose starvation	4	0.608828	0.0812742	NUAK2, IFI16, ZC3H12A, UPP1	594	29	16792	3.89922	1	0.777584	0.762517
KEGG_PATHWAY	hsa05145:Toxoplasmosis	9	1.36986	0.0826788	LAMA5, IFNGR1, ALOX5, LAMA3, ITGA6, GNAI1, BCL2L1, TLR2, BIRC3	284	110	6879	1.98179	1	0.476845	0.449926
GOTERM_BP_DIRECT	GO:0048013~ephrin receptor signaling pathway	7	1.06545	0.0835164	VAV3, EFNB2, SDCBP, EPHA4, ARPC2, EPHB2, EPHA2	594	86	16792	2.30099	1	0.796746	0.781307
GOTERM_MF_DIRECT	GO:0004185~serine-type carboxypeptidase activity	3	0.456621	0.0843476	CPM, CPD, CPE	592	14	16881	6.1104	1	0.779293	0.756874
GOTERM_BP_DIRECT	GO:0007399~nervous system development	16	2.43531	0.0851797	SEMA5A, SEMA6A, JAG1, CRIM1, CXCL1, NRG1, FOS, PCDH18, BARX2, FGF5, SLC7A5, DLG4, NINJ1, ZC3H12A, HES1, EPHB2	594	287	16792	1.57599	1	0.796746	0.781307
GOTERM_MF_DIRECT	GO:0002039~p53 binding	6	0.913242	0.0851931	PLK3, TRIM29, MDM2, MSX1, TAF3, TP73	592	67	16881	2.5536	1	0.779293	0.756874
GOTERM_BP_DIRECT	GO:0032743~positive regulation of interleukin-2 production	3	0.456621	0.0856163	ANXA1, PDE4D, RUNX1	594	14	16792	6.05772	1	0.796746	0.781307
GOTERM_BP_DIRECT	GO:0030194~positive regulation of blood coagulation	3	0.456621	0.0856163	F2R, THBS1, S100A9	594	14	16792	6.05772	1	0.796746	0.781307
GOTERM_BP_DIRECT	GO:0002009~morphogenesis of an epithelium	3	0.456621	0.0856163	FRAS1, CA2, SERPINB5	594	14	16792	6.05772	1	0.796746	0.781307
GOTERM_BP_DIRECT	GO:0010839~negative regulation of keratinocyte proliferation	3	0.456621	0.0856163	EFNB2, VDR, SNAI2	594	14	16792	6.05772	1	0.796746	0.781307
GOTERM_BP_DIRECT	GO:0090303~positive regulation of wound healing	3	0.456621	0.0856163	KANK1, ANXA1, HMGB1	594	14	16792	6.05772	1	0.796746	0.781307
GOTERM_BP_DIRECT	GO:0071354~cellular response to interleukin-6	3	0.456621	0.0856163	SBNO2, PID1, PPARGC1A	594	14	16792	6.05772	1	0.796746	0.781307
GOTERM_BP_DIRECT	GO:0048009~insulin-like growth factor receptor signaling pathway	3	0.456621	0.0856163	CRIM1, GRB10, TSC2	594	14	16792	6.05772	1	0.796746	0.781307
GOTERM_BP_DIRECT	GO:0043537~negative regulation of blood vessel endothelial cell migration	3	0.456621	0.0856163	RGCC, HMGB1, THBS1	594	14	16792	6.05772	1	0.796746	0.781307
GOTERM_CC_DIRECT	GO:0001726~ruffle	7	1.06545	0.0857365	CDK6, MYO10, ANXA2, FSCN1, S100A6, S100A11, MTSS1	620	90	18224	2.28616	1	0.624657	0.587826
KEGG_PATHWAY	hsa05219:Bladder cancer	5	0.761035	0.0864923	CDKN1A, RPS6KA5, MDM2, THBS1, EGFR	284	41	6879	2.95388	1	0.487502	0.459982
GOTERM_CC_DIRECT	GO:0005764~lysosome	13	1.97869	0.0865069	CALCRL, LRRK2, SLC11A2, CXCR4, TSC2, PCSK9, ADRB2, TPCN1, IL1B, CAPN2, RAB38, RNF152, CTSC	620	226	18224	1.69078	1	0.624657	0.587826
GOTERM_MF_DIRECT	GO:0097110~scaffold protein binding	5	0.761035	0.0865112	DLG4, PDE4D, MDM2, ATP2B4, TREM1	592	48	16881	2.97033	1	0.783106	0.760577
GOTERM_CC_DIRECT	GO:0031941~filamentous actin	4	0.608828	0.0869216	TMSB4X, TPM1, FSCN1, IQGAP2	620	31	18224	3.79272	1	0.624657	0.587826
GOTERM_BP_DIRECT	GO:0010862~positive regulation of pathway-restricted SMAD protein phosphorylation	5	0.761035	0.0886432	SDCBP, DAB2, BMP2, BMP8A, GDF5	594	48	16792	2.94473	1	0.822667	0.806726
GOTERM_CC_DIRECT	GO:0005912~adherens junction	5	0.761035	0.089273	SDCBP, NOTCH1, JAG1, AJUBA, FAM129B	620	50	18224	2.93935	1	0.630862	0.593665
GOTERM_CC_DIRECT	GO:0005802~trans-Golgi network	9	1.36986	0.0923401	CPD, LRRK2, SLC11A2, RGS20, RAB38, FNBP1L, AP4B1, ATP9A, STX10	620	136	18224	1.94516	1	0.63569	0.598208
GOTERM_MF_DIRECT	GO:0016874~ligase activity	15	2.28311	0.0925718	ACSL1, CBLC, RNF19B, NEDD4L, CBLB, RNF4, MID1, ACACA, TRIM8, RNF144B, SH3RF2, NEDD4, MDM2, RNF152, BIRC3	592	270	16881	1.58418	1	0.823528	0.799836
GOTERM_CC_DIRECT	GO:0005581~collagen trimer	7	1.06545	0.0929547	FAM122B, COL18A1, CCBE1, LOX, COL12A1, COL4A6, COL4A5	620	92	18224	2.23647	1	0.63569	0.598208
GOTERM_BP_DIRECT	GO:0071392~cellular response to estradiol stimulus	4	0.608828	0.0950378	ITGA2, NCOA3, PPARGC1A, EGFR	594	31	16792	3.64766	1	0.831201	0.815095
GOTERM_BP_DIRECT	GO:0045765~regulation of angiogenesis	4	0.608828	0.0950378	ID1, PTK2B, ETS1, EPHA2	594	31	16792	3.64766	1	0.831201	0.815095
GOTERM_BP_DIRECT	GO:0071479~cellular response to ionizing radiation	4	0.608828	0.0950378	CDKN1A, IFI16, SNAI2, RHOB	594	31	16792	3.64766	1	0.831201	0.815095
GOTERM_BP_DIRECT	GO:0046676~negative regulation of insulin secretion	4	0.608828	0.0950378	PPP3CA, MIDN, VSNL1, BMP8A	594	31	16792	3.64766	1	0.831201	0.815095
BIOCARTA	h_vdrPathway:Control of Gene Expression by Vitamin D Receptor	5	0.761035	0.0962656	RXRA, VDR, NCOA3, TSC2, ARID1A	112	26	1625	2.79018	1	1	1
GOTERM_BP_DIRECT	GO:0035690~cellular response to drug	6	0.913242	0.0964697	EIF2B5, PPP3CA, EDN1, IL1B, ADSSL1, EGFR	594	69	16792	2.45821	1	0.831201	0.815095
GOTERM_BP_DIRECT	GO:0033627~cell adhesion mediated by integrin	3	0.456621	0.0965543	ITGA2, ADAM9, ITGA6	594	15	16792	5.65387	1	0.831201	0.815095
GOTERM_BP_DIRECT	GO:0014850~response to muscle activity	3	0.456621	0.0965543	ITGA2, ADSSL1, PPARGC1A	594	15	16792	5.65387	1	0.831201	0.815095
GOTERM_BP_DIRECT	GO:0048714~positive regulation of oligodendrocyte differentiation	3	0.456621	0.0965543	CXCR4, TLR2, TP73	594	15	16792	5.65387	1	0.831201	0.815095
GOTERM_BP_DIRECT	GO:0006691~leukotriene metabolic process	3	0.456621	0.0965543	ALOX5, PTGR1, TLR2	594	15	16792	5.65387	1	0.831201	0.815095
GOTERM_BP_DIRECT	GO:0030502~negative regulation of bone mineralization	3	0.456621	0.0965543	PTK2B, BCOR, SOX9	594	15	16792	5.65387	1	0.831201	0.815095
GOTERM_BP_DIRECT	GO:0032874~positive regulation of stress-activated MAPK cascade	3	0.456621	0.0965543	TAOK3, TAOK1, MID1	594	15	16792	5.65387	1	0.831201	0.815095
GOTERM_BP_DIRECT	GO:0044458~motile cilium assembly	3	0.456621	0.0965543	DNAAF1, DMD, SPATA6	594	15	16792	5.65387	1	0.831201	0.815095
GOTERM_BP_DIRECT	GO:0002437~inflammatory response to antigenic stimulus	3	0.456621	0.0965543	NOTCH1, HMGB2, HMGB1	594	15	16792	5.65387	1	0.831201	0.815095
GOTERM_BP_DIRECT	GO:0002042~cell migration involved in sprouting angiogenesis	3	0.456621	0.0965543	EFNB2, NRP1, KDR	594	15	16792	5.65387	1	0.831201	0.815095
GOTERM_BP_DIRECT	GO:0006309~apoptotic DNA fragmentation	3	0.456621	0.0965543	HMGB2, HMGB1, DICER1	594	15	16792	5.65387	1	0.831201	0.815095
GOTERM_BP_DIRECT	GO:2000310~regulation of N-methyl-D-aspartate selective glutamate receptor activity	3	0.456621	0.0965543	DLG4, PTK2B, PPARGC1A	594	15	16792	5.65387	1	0.831201	0.815095
GOTERM_CC_DIRECT	GO:0005610~laminin-5 complex	2	0.304414	0.0984819	LAMA5, LAMA3	620	3	18224	19.5957	1	0.662799	0.623719
GOTERM_BP_DIRECT	GO:0051092~positive regulation of NF-kappaB transcription factor activity	9	1.36986	0.0990444	TRIM8, RPS6KA5, IRAK2, IL1B, IL1RAP, LRRFIP1, CARD14, S100A9, TLR2	594	133	16792	1.91296	1	0.831201	0.815095
GOTERM_BP_DIRECT	GO:0006914~autophagy	9	1.36986	0.0990444	VMP1, IFI16, ITGB4, LRRK2, TFEB, HMGB1, FNBP1L, S100A9, FOXO1	594	133	16792	1.91296	1	0.831201	0.815095
