# Supplementary material for: Promoter-specific changes in initiation, elongation, and homeostasis of histone H3 acetylation during CBP/p300 inhibition
Source: eLife. 2021 Mar 11;10:e63512. doi: 10.7554/eLife.63512 (PMC8009678; doi:10.7554/eLife.63512)
Supplement: Figure 5—source data 1. [file elife-63512-fig5-data1.xlsx]

## Sheet: Sheet1
Figure 5b-source data 1
All active	2XPI	2XIn
CSF3	SCYL2	CSF3
LAMB3	NNMT	LAMB3
BEST1	IL1B	BEST1
NEK6	ZBTB41	NEK6
CSF3	NECTIN1	CSF3
PTHLH	DNER	PTHLH
S100A5	PAG1	S100A5
GDA	SGK1	GDA
HAS2	SIK1	HAS2
PRR34	CXCR4	PRR34
CMIP	LIMA1	CMIP
BICDL1	TRIB1	BICDL1
APOBEC3H	NDRG1	APOBEC3H
ALDH3A1	TNFRSF6B	ALDH3A1
CCDC102B	SMOC1	CCDC102B
ZBTB16	FBXO32	ZBTB16
BFSP1	TNIK	BFSP1
FOXQ1	SEMA6A	FOXQ1
PLEC	CPM	PLEC
CAPN2	DENND3	CAPN2
TGIF1	PDGFD	TGIF1
IRF2BP2	DUSP10	IRF2BP2
UPP1	AKR1C2	UPP1
AGAP11	SLC38A4	AGAP11
DUSP10	IQGAP2	DUSP10
CAV1	SNAI2	CAV1
S100A10	ETS2	S100A10
GPRC5C	RPS6KA2	GPRC5C
PTCHD4	SYT14	PTCHD4
DUSP4	PLK2	DUSP4
IL6	RAB27B	IL6
LOXL4	ACKR3	LOXL4
GAS1	B4GALNT2	GAS1
GALNT15	SVIL	GALNT15
PRAG1	JAG1	PRAG1
FBXO32	TFPI	FBXO32
GJB3	MME	GJB3
AJUBA	CPEB2	AJUBA
KCNJ15	KYNU	KCNJ15
KLF7	MET	KLF7
SYT12	KLRC2	SYT12
PTGES	RND3	PTGES
ABCC3	FKBP5	ABCC3
HOPX	SRGAP3	HOPX
ENC1	UBASH3B	ENC1
TINAGL1	PRRG2	TINAGL1
PDPN	SLC7A11	PDPN
GPC6	ABCC10	GPC6
CLCF1	C20orf197	CLCF1
CITED2	PAMR1	CITED2
GPR87	ITGB4	GPR87
PALMD	MTSS1	PALMD
SCNN1A	FOXO1	SCNN1A
SYNPO	KIAA0040	SYNPO
BBC3	KCNJ2	BBC3
PHLDB2	CBLC	PHLDB2
GLI3	EPHA2	GLI3
HDAC9	BCL3	HDAC9
2021-09-09	CD9	2021-09-09
LINC00482	EPAS1	LINC00482
RASSF6	NTN4	RASSF6
LY6K	CD82	LY6K
GSDMC	CITED2	GSDMC
TSC22D3	ITGB8	TSC22D3
SAMSN1	KCNK15	SAMSN1
BCL9L	IGFBP7	BCL9L
TNFAIP2	NRP1	TNFAIP2
PDE4B	MORN5	PDE4B
PDGFC	PLCXD2	PDGFC
MYC	DHRS3	MYC
S100A4	KLF10	S100A4
MGLL	FAH	MGLL
CCDC9	ADSSL1	CCDC9
PAK6	PTK2B	PAK6
KCNN4	ST5	KCNN4
RAET1E	HES1	RAET1E
TCF21	STK40	TCF21
SLC43A3	IL18BP	SLC43A3
KYNU	BCAR3	KYNU
SERPINB13	TNFRSF21	SERPINB13
CLDN1	SLC25A23	CLDN1
KRT7	DUSP4	KRT7
BCL3	PID1	BCL3
SBNO2	MFAP2	SBNO2
C1orf116	DKK1	C1orf116
ZNF608	EHF	ZNF608
KRT19	EMP1	KRT19
RASGRF2	IGFBP4	RASGRF2
GAS6	CA2	GAS6
NDRG2	ZBTB16	NDRG2
TSHZ3	SDR16C5	TSHZ3
PMEPA1	MAST4	PMEPA1
MAOA	RIPOR2	MAOA
FAM129B	HR	FAM129B
ANGPT1	WNT7B	ANGPT1
VIM	COL4A6	VIM
PRMT8	MYO1B	PRMT8
MAF	MICAL2	MAF
SLC25A45	CRIM1	SLC25A45
TNFRSF1A	ADAMTS1	TNFRSF1A
NTNG1	PRKAG2	NTNG1
ABLIM3	NFIA	ABLIM3
WBP1L	MLPH	WBP1L
TNS4	IL18	TNS4
SOX7	PTPRE	SOX7
EHF	MGLL	EHF
PIK3R1	TP73	PIK3R1
WDR66	TRIM8	WDR66
C20orf96	FAM83A	C20orf96
VEGFC	IZUMO4	VEGFC
IFIT3	SH2D3C	IFIT3
S100P	HCFC1R1	S100P
TM4SF1	GRIA3	TM4SF1
MAB21L3	VANGL1	MAB21L3
AEN	TRIB2	AEN
NETO1	ID1	NETO1
HOXD11	TNS4	HOXD11
PPP4R1	LIMCH1	PPP4R1
MEI1	ANGPT1	MEI1
GNAT1	TRPA1	GNAT1
FZD8	MXI1	FZD8
MSC	DNAH6	MSC
RIN2	DDIT4	RIN2
SVIL	KLF4	SVIL
RHBDF2	PDE7B	RHBDF2
ALS2CL	DUSP23	ALS2CL
ZFP36L2	NABP1	ZFP36L2
SLC1A5	RNF144B	SLC1A5
LRIG3	RALGDS	LRIG3
GJB4	ZMYND8	GJB4
SERPINB1	CD7	SERPINB1
FAS	SLC22A3	FAS
FZD6	LFNG	FZD6
B3GNT5	ETS1	B3GNT5
FAM83A	S100A9	FAM83A
GBP3	LAMA3	GBP3
SLC41A3	NIPAL4	SLC41A3
SULF2	PLXNA2	SULF2
BMPER	EXT1	BMPER
NR2F2	DDX20	NR2F2
TBC1D2	IFITM1	TBC1D2
KLF6	CD55	KLF6
B4GALNT2	CXCL1	B4GALNT2
SECTM1	ELL2	SECTM1
HES2	TMEM40	HES2
LIMA1	PPARGC1A	LIMA1
ITPKC	DUSP1	ITPKC
MAST4	DCBLD1	MAST4
PRKAG2	PCP4L1	PRKAG2
UTS2B	PCSK5	UTS2B
EDN1	TPST2	EDN1
C20orf197	DICER1	C20orf197
EDN2	MCTP1	EDN2
CMBL	TGFBR3	CMBL
MTUS1	ERRFI1	MTUS1
TNFRSF10C	CYP3A5	TNFRSF10C
RCAN1	AJM1	RCAN1
TRIB2	RNASE7	TRIB2
KRT14	EGLN3	KRT14
BCL6	TSC22D3	BCL6
HMGB3	S100A6	HMGB3
TRAK1	KLF6	TRAK1
THBD	CDC25B	THBD
IRF2BPL	SERPINB5	IRF2BPL
SPTLC3	PDE4D	SPTLC3
CD44	DIXDC1	CD44
SPRY1	RXRA	SPRY1
WISP2	NRCAM	WISP2
IFITM2	BHLHE40	IFITM2
KIF21A	KLF3	KIF21A
MSLN	2021-09-09	MSLN
SKIL	KDR	SKIL
NBL1	NHSL1	NBL1
UBC	RUNX1	UBC
CYB561A3	SEMA4B	CYB561A3
CD160	SH3PXD2B	CD160
PRDM1	AMDHD1	PRDM1
NREP	SESN3	NREP
KCTD1	ANXA1	KCTD1
REPIN1	IL22RA1	REPIN1
SPATS2L	ADAMTSL1	SPATS2L
RUSC2	SOBP	RUSC2
SLC16A3	TFEB	SLC16A3
HMGA1	PAQR5	HMGA1
EDNRA	HRH1	EDNRA
PALM2-AKAP2	MAML2	PALM2-AKAP2
PALM2	PRMT8	PALM2
EHBP1	LRRC36	EHBP1
ALOXE3	EPHB2	ALOXE3
CYP1B1	SHB	CYP1B1
PELI2	FHL2	PELI2
ACTA2	PHPT1	ACTA2
RUNX1	SPAG1	RUNX1
CXCL8	NFRKB	CXCL8
KLF13	S100A11	KLF13
MME	FHOD3	MME
CD59	RAB31	CD59
BIRC3	VAV3	BIRC3
RNASE7	PLEKHG3	RNASE7
DNASE1L3	SPRY1	DNASE1L3
TREM1	CDKN1A	TREM1
RIPOR2	IL1RAP	RIPOR2
ANGPTL2	FAM46B	ANGPTL2
PPARGC1A	IFI16	PPARGC1A
GJB5	COL8A1	GJB5
PLAT	CSF2	PLAT
S100A11	LOXL2	S100A11
HIF3A	ZYX	HIF3A
SLC7A8	AKAP2	SLC7A8
VGLL4	SLC7A5	VGLL4
CFLAR	PSG4	CFLAR
UCN2	UGP2	UCN2
BHLHE40	CBLB	BHLHE40
KRT16	KLF5	KRT16
ARHGAP24	CST6	ARHGAP24
TGFBR2	STOM	TGFBR2
TM4SF19	ELMSAN1	TM4SF19
NFATC1	NRXN3	NFATC1
PXN	PPP3CA	PXN
AKR1C3	C1orf116	AKR1C3
SPATA18	NUAK2	SPATA18
DKK1	CERS6	DKK1
HSPA6	RHBDF2	HSPA6
SLC12A4	MID1	SLC12A4
CSTA	EDN1	CSTA
FRMD6	BTG1	FRMD6
AXL	ARHGAP21	AXL
ITGB7	SERPINE2	ITGB7
FLRT2	SOGA1	FLRT2
FBLIM1	FBXW7	FBLIM1
ANXA2	KITLG	ANXA2
INHBA	ATP1B1	INHBA
CTBP2	FBLN1	CTBP2
SPX	OSGIN2	SPX
ZFP36L1	MGST1	ZFP36L1
NFE2L2	RAB40B	NFE2L2
MID1IP1	CDC42EP4	MID1IP1
PLAU	ALDH3A2	PLAU
CLDN14	TRAF3IP2	CLDN14
CA12	APBB2	CA12
WNT7B	RASL11B	WNT7B
NIPAL4	OSR1	NIPAL4
PTPRZ1	AJUBA	PTPRZ1
ZC3H12C	RGCC	ZC3H12C
SSH1	LIPG	SSH1
ZNF217	OGFRL1	ZNF217
DGLUCY	ALCAM	DGLUCY
EFCAB1	HIPK2	EFCAB1
SPRED2	SSH1	SPRED2
RIOK3	ARID1A	RIOK3
SPHK1	AKR1C3	SPHK1
MARK2	MID1IP1	MARK2
TPM1	TBXAS1	TPM1
WNT3A	VSIR	WNT3A
BRAT1	TACC1	BRAT1
KRT17	EFEMP1	KRT17
CCDC9B	SOX9	CCDC9B
NT5E	SMAP2	NT5E
C1RL	PHLDB2	C1RL
SH3RF2	RNF152	SH3RF2
MN1	GJB4	MN1
LARP6	PTPN12	LARP6
CROCC	C1orf112	CROCC
HMGA2	SEMA3C	HMGA2
BACE2	ERGIC1	BACE2
PPAN-P2RY11	FOS	PPAN-P2RY11
PTP4A1	FYB1	PTP4A1
TAGLN	FRMD6	TAGLN
SCCPDH	HIVEP2	SCCPDH
TNFSF10	FAM222B	TNFSF10
GJA1	JADE2	GJA1
FGFR2	YWHAZ	FGFR2
TMEM187	EDN2	TMEM187
CCDC71L	CDK6	CCDC71L
FYB1	VDR	FYB1
TFAP2A	VGLL3	TFAP2A
ME1	CCBE1	ME1
TP53BP2	PDXK	TP53BP2
JAK3	IRAK2	JAK3
JPH2	SLC16A3	JPH2
COL8A1	TEDC1	COL8A1
HTRA4	NRG1	HTRA4
STEAP3	DAB2	STEAP3
ABCA1	ITPRIP	ABCA1
DOCK9	E2F8	DOCK9
GLIPR1	IMPA2	GLIPR1
G0S2	FGF9	G0S2
ZNF462	RASEF	ZNF462
PTPRE	AKR1C1	PTPRE
F3	UNC5D	F3
TSPO	ALOX15B	TSPO
C21orf2	RELL1	C21orf2
TLL1	HIBADH	TLL1
TNFAIP3	TBC1D8	TNFAIP3
TMEM88	ELF1	TMEM88
NRP1	BCL2L1	NRP1
SH2D4A	PTPRU	SH2D4A
SMS	RAB38	SMS
CTSS	MT1X	CTSS
IGFBP3	LRMP	IGFBP3
SLC37A2	CAV1	SLC37A2
KXD1	ECE1	KXD1
DDIT4	VMP1	DDIT4
RUNX2	AVPI1	RUNX2
DUSP1	TPPP3	DUSP1
GDF15	FAM46A	GDF15
ARL4C	PRDM1	ARL4C
FAM196A	TRIM29	FAM196A
NR0B1	GADD45B	NR0B1
ADIRF	CDCP1	ADIRF
DSP	BACH1	DSP
AMOTL2	TNS2	AMOTL2
CAVIN3	GNAI1	CAVIN3
CCBE1	ACSL1	CCBE1
IL11	ALOX5	IL11
IFI44L	HPCAL1	IFI44L
TBX1	SMAD3	TBX1
CYP3A5	SMOX	CYP3A5
SNAI2	SERINC2	SNAI2
IRX3	MEST	IRX3
EFNA5	NOTCH1	EFNA5
C1QTNF1	ST8SIA1	C1QTNF1
MFSD10	NR1D1	MFSD10
ST3GAL1	LETM2	ST3GAL1
FHL2	BASP1	FHL2
PHYHD1	FAT2	PHYHD1
PCDHB13	STX10	PCDHB13
CRYM	RTN4	CRYM
THOC6	MARVELD1	THOC6
NEK8	FOXO3	NEK8
CEBPB	MSX1	CEBPB
EPHA2	SPSB1	EPHA2
NCK1	MYCL	NCK1
EGFR	MERTK	EGFR
TXNRD1	NEK6	TXNRD1
ANXA1	OSBPL3	ANXA1
SLC2A9	ADIRF	SLC2A9
PSG4	TSKU	PSG4
KLF3	IRS2	KLF3
TNIP1	ADRB2	TNIP1
GRAMD2A	PCDH18	GRAMD2A
PANX1	ZNF750	PANX1
MYOF	CSRNP1	MYOF
IFNGR1	NEDD4L	IFNGR1
LURAP1L	TMEM232	LURAP1L
DSG3	ABL2	DSG3
KLRC2	GULP1	KLRC2
ABLIM1	IL17RE	ABLIM1
CDA	HTRA1	CDA
AHDC1	ACTN4	AHDC1
NACC2	GFOD1	NACC2
ZNF688	SH3TC1	ZNF688
ALOX15B	TAOK3	ALOX15B
GULP1	PPP2R2A	GULP1
HNRNPUL1	ABCA1	HNRNPUL1
RBMS1	PTGR1	RBMS1
KLF10	MYOF	KLF10
ABCA6	FAM84A	ABCA6
S100A16	PDGFA	S100A16
RGMB	TSC2	RGMB
NR3C1	TMEM51	NR3C1
HAPLN3	BICC1	HAPLN3
EPSTI1	USP2	EPSTI1
CD7	SLC7A8	CD7
CCDC68	CALCRL	CCDC68
RNF145	SLC16A4	RNF145
RCC2	DYSF	RCC2
ACOT7	UPP1	ACOT7
C5orf56	COL4A5	C5orf56
ARHGAP22	GPSM2	ARHGAP22
C11orf96	ZNF608	C11orf96
ADAM19	AMMECR1L	ADAM19
LRRC8A	SPATA6	LRRC8A
TAB3	WNT7A	TAB3
PHACTR2	DOCK5	PHACTR2
TMEM200B	ZFP1	TMEM200B
PGAM5	PLSCR1	PGAM5
LEKR1	BMP8A	LEKR1
PHLDA3	MYNN	PHLDA3
MT1E	ITPR3	MT1E
CLMP	PHLDB1	CLMP
LITAF	TRAF4	LITAF
PCDHGA1	DKK3	PCDHGA1
USP1	LYPD5	USP1
BACH1	ELK3	BACH1
TSPAN17	MYO10	TSPAN17
PLEKHG4	YIF1B	PLEKHG4
NFIL3	LRRFIP1	NFIL3
ETS2	RUNX2	ETS2
SYTL1	SYCE3	SYTL1
ADAM32	LMO3	ADAM32
TSKU	ZFP36L1	TSKU
PLEKHG5	LOX	PLEKHG5
CXCL2	GPT2	CXCL2
TFPI	ARHGEF37	TFPI
KIAA0040	LDLRAD3	KIAA0040
PRKCH	ANKRD18A	PRKCH
PDE4DIP	LRRK2	PDE4DIP
CAVIN2	CHD3	CAVIN2
ADAM28	MIEF2	ADAM28
CMTM3	ISYNA1	CMTM3
STX3	TXNRD1	STX3
CDKN2A	CITED1	CDKN2A
HSPE1	ATP9A	HSPE1
MAFG	ADAMTSL4	MAFG
PAN3	LPAR3	PAN3
GNRH2	CDK20	GNRH2
CTGF	SMAD7	CTGF
SOX4	TREM1	SOX4
PKP3	FAM122B	PKP3
CNN2	LURAP1L	CNN2
ITGB8	THSD1	ITGB8
LTBP2	NR1D2	LTBP2
YWHAZ	ZNF497	YWHAZ
RNF152	DUSP6	RNF152
ZNF697	ACACA	ZNF697
ENKUR	CDH11	ENKUR
MITF	SH3RF2	MITF
PLP2	LHFPL2	PLP2
RARB	PDLIM1	RARB
FDX1	DNAAF1	FDX1
SERPINA1	DNAJB5	SERPINA1
FAM183A	YBX3	FAM183A
DDX3X	WDR63	DDX3X
KRT6A	NFIL3	KRT6A
TAGLN2	CTSC	TAGLN2
SLPI	EIF2B5	SLPI
TGFB2	DNM3	TGFB2
BID	TNS1	BID
YAP1	CBLN3	YAP1
MARCKS	NCOA3	MARCKS
PPAN	KANK1	PPAN
STON2	HSF2BP	STON2
MAFF	FADS2	MAFF
EGLN2	EYA4	EGLN2
CDH1	PTHLH	CDH1
TGFBR3	AGO4	TGFBR3
PDGFA	TNFAIP8	PDGFA
OSGIN1	DSE	OSGIN1
CD70	KCNMB4	CD70
RBMS3	BARX2	RBMS3
CDC42EP1	DEPP1	CDC42EP1
FST	AHR	FST
CXCL1	SLC11A2	CXCL1
USP49	TPM1	USP49
ELF3	ADGRF4	ELF3
CCDC13	DPYD	CCDC13
SLITRK6	CMIP	SLITRK6
MADD	PHC2	MADD
ADGRF4	DLG4	ADGRF4
BCOR	IQCD	BCOR
SLC38A4	RHOBTB3	SLC38A4
SH2D5	IRF2BPL	SH2D5
POGZ	PWWP2B	POGZ
TNFRSF12A	NT5DC3	TNFRSF12A
CRABP2	FANCE	CRABP2
PRODH	PGF	PRODH
GLRX	MAPK4	GLRX
LAMA3	CTXN1	LAMA3
KCNJ2	IRF6	KCNJ2
CCDC50	ANKRD52	CCDC50
RAB27B	ZC3H12A	RAB27B
MGST1	TAF3	MGST1
BCAT1	RFX2	BCAT1
RAB36	SEMA5A	RAB36
VIPR1	PEX2	VIPR1
CFL2	C1orf21	CFL2
BMP2	TMEM45A	BMP2
CFAP58	TGIF1	CFAP58
MOB3B	TRPT1	MOB3B
SOX12	WNT9A	SOX12
TTC23L	IL4R	TTC23L
KRT18	RHOB	KRT18
PTPN12	CEBPD	PTPN12
S100A9	GABRE	S100A9
ALDH3B1	LIF	ALDH3B1
SLC29A1	GRB10	SLC29A1
IL20RB	RGN	IL20RB
SERPINB5	EPHA4	SERPINB5
ZNF414	MAP2	ZNF414
ATP1A1	ITGA3	ATP1A1
LRRK2	SLPI	LRRK2
ITPRIP	TFCP2L1	ITPRIP
GNG11	COL18A1	GNG11
SRSF4	ATP2B4	SRSF4
CHST3	C21orf91	CHST3
GSDME	PHF12	GSDME
C1S	FSCN1	C1S
WDR13	BIRC3	WDR13
MIA2	AP4B1	MIA2
SOCS3	KIAA0513	SOCS3
GSTO2	HOPX	GSTO2
CD109	TBC1D9	CD109
TNFRSF6B	TSPAN5	TNFRSF6B
CASP8	DDX56	CASP8
BCAR3	MIDN	BCAR3
SMAD7	BCHE	SMAD7
TYMP	CTNNAL1	TYMP
LGALSL	CTBP2	LGALSL
CSRP1	ALDH1L1	CSRP1
BCL9	ARHGDIB	BCL9
ZNF580	OSMR	ZNF580
ZNF641	S100A13	ZNF641
RND3	ZFYVE28	RND3
DSEL	FNBP1L	DSEL
CA2	HDAC7	CA2
EYA1	ACOT11	EYA1
KRT5	CASP4	KRT5
FERMT1	SLFN5	FERMT1
LAMA4	TGFA	LAMA4
CPED1	B4GALT1	CPED1
MTFP1	ITGA6	MTFP1
BCAP29	TMEM65	BCAP29
SLC22A4	F2R	SLC22A4
TMSB4XP8	PLXNB2	TMSB4XP8
TMSB4X	HIF3A	TMSB4X
SLC1A4	SBNO2	SLC1A4
MIDN	RASA3	MIDN
THRB	TLR2	THRB
UBTD1	POLE4	UBTD1
C3orf52	LHFPL6	C3orf52
CSF2	KCNE4	CSF2
SNX7	SNX22	SNX7
DSG2	NR4A2	DSG2
N4BP2	RGS17	N4BP2
HMGN3	FLOT2	HMGN3
DHRS3	ARPC2	DHRS3
TNS2	NDE1	TNS2
ZNF22	F3	ZNF22
AP2S1	RHOC	AP2S1
FAM83H	VSNL1	FAM83H
EREG	NEDD4	EREG
COQ8B	PLXDC2	COQ8B
FXYD5	EFNB2	FXYD5
PTGS2	NEDD9	PTGS2
ADGRE5	STON2	ADGRE5
ETS1	GALNT2	ETS1
METTL7A	NCS1	METTL7A
EFEMP1	TPCN1	EFEMP1
PRICKLE1	FTH1	PRICKLE1
CBR3	KIF17	CBR3
ACKR3	TMSB4XP8	ACKR3
AKR1B1	THBS1	AKR1B1
IL18	TMSB4X	IL18
ARHGEF40	ADRM1	ARHGEF40
ETV6	DMD	ETV6
PRTFDC1	BTG2	PRTFDC1
JUN	PHLDA1	JUN
UNKL	TBC1D2B	UNKL
EPOP	SYBU	EPOP
NR1D1	GDF5	NR1D1
TRAF1	TIPARP	TRAF1
RIPK4	MAOA	RIPK4
ZFHX3	FILIP1L	ZFHX3
SMAD6	ANXA2	SMAD6
ABHD17C	ZKSCAN2	ABHD17C
DEPP1	PCDHGA3	DEPP1
C6orf132	HMGB1	C6orf132
RAMP1	RASGEF1B	RAMP1
HSPB1	PIK3R3	HSPB1
GPR39	HEY1	GPR39
SIRPA	SAT1	SIRPA
TEAD1	RREB1	TEAD1
TP63	EGFR	TP63
SERPINF2	IER5L	SERPINF2
CAB39	PYGB	CAB39
FAM35A	ALDH3B1	FAM35A
ADSS	FOXC2	ADSS
SERPINB8	IKZF2	SERPINB8
TMEFF2	FAM129B	TMEFF2
ZDHHC9	FAM241A	ZDHHC9
HOXB7	MAP7D1	HOXB7
ZFAT	RPS6KA5	ZFAT
KIF26B	TLE3	KIF26B
FAM129A	KCNG1	FAM129A
PEAR1	NUDT4	PEAR1
TNFRSF21	MN1	TNFRSF21
FOXN3	MDM2	FOXN3
ARL4A	ARSJ	ARL4A
SLC25A24	FMNL2	SLC25A24
RGS17	FZD4	RGS17
AMPD3	PLEKHH3	AMPD3
RHOV	ITGA2	RHOV
ELK3	STAG3L1	ELK3
RNF165	LAMA5	RNF165
SLC19A1	CCDC148	SLC19A1
SELENOH	EYA1	SELENOH
WDR5	C16orf74	WDR5
MFSD2A	PCBP4	MFSD2A
RMI1	GPR176	RMI1
SLC6A6	LMNA	SLC6A6
RAB31	RSPH6A	RAB31
B3GLCT	NR3C2	B3GLCT
LRRC71	PNPLA7	LRRC71
GALNT5	INPP5A	GALNT5
COL16A1	RGS20	COL16A1
CARD14	CPD	CARD14
SERPINE1	BCOR	SERPINE1
FOSL1	SESN1	FOSL1
HRH1	IQCN	HRH1
TJP2	SCG5	TJP2
MUC1	TBCK	MUC1
TLNRD1	POC1B	TLNRD1
CAV2	CORO1C	CAV2
GADD45A	CDKN1C	GADD45A
RNF144B	JUN	RNF144B
IL1B	MCF2L2	IL1B
TMEM40	GSDME	TMEM40
GDF5	SMKR1	GDF5
TRMT61A	PAIP1	TRMT61A
CASZ1	EHBP1	CASZ1
P2RY2	SELENOF	P2RY2
TRAF3IP2	E2F7	TRAF3IP2
IL4R	NXNL2	IL4R
PLAUR	SOWAHC	PLAUR
FSTL3	FAM89B	FSTL3
ZNF783	TAOK1	ZNF783
LPGAT1	INHBA	LPGAT1
NEXN	CYTH1	NEXN
RCN1	HMGB2	RCN1
SAMD1	DOCK4	SAMD1
RBM47	NRP2	RBM47
AHNAK2	ITGAE	AHNAK2
BTBD19	COL12A1	BTBD19
PIK3IP1	PRSS23	PIK3IP1
B3GNT3	RASSF5	B3GNT3
PPP1R3F	IFNGR1	PPP1R3F
ABL2	SEC31B	ABL2
ZC3H12A	GRHL1	ZC3H12A
BMF	CYR61	BMF
SRXN1	FRAS1	SRXN1
OSMR	THRB	OSMR
SLC6A9	APOL1	SLC6A9
MPDU1	CRISPLD2	MPDU1
DPH6	RBM47	DPH6
IRF6	DUSP5	IRF6
PTK2B	CAPN2	PTK2B
MICAL1	RNF4	MICAL1
DGKZ	NAMPT	DGKZ
ALG13	RIC1	ALG13
LATS2	PMEPA1	LATS2
ADAMTSL1	CYP39A1	ADAMTSL1
SETBP1	TIMP2	SETBP1
DDX31	TSSK3	DDX31
DAB2	RAPH1	DAB2
GPC1	KCNN4	GPC1
DSE	LRIG3	DSE
VGLL3	GAB3	VGLL3
DGKA	CX3CL1	DGKA
EMP1	EVA1A	EMP1
SDR16C5	CLMP	SDR16C5
ERCC1	ZP3	ERCC1
SNX33	PLK3	SNX33
NFIB	KHDRBS3	NFIB
METTL1	LBH	METTL1
FAT1	PCSK9	FAT1
GBP1	RNF19B	GBP1
HDGF	ARRDC2	HDGF
ARAP2	ADAM9	ARAP2
CDS1	NFKBIZ	CDS1
SLC25A34	SDCBP	SLC25A34
NDUFAF3	ARL4C	NDUFAF3
TWF1	FAM189B	TWF1
CDK17	CEBPB	CDK17
BASP1	RAP1GAP	BASP1
PDLIM1	ANKRD33B	PDLIM1
SLC6A8	NINJ1	SLC6A8
IGF1R	PFKP	IGF1R
SLC22A3	PLPP1	SLC22A3
CCM2	MYO1D	CCM2
FNTA	CARD14	FNTA
CSNK1E	CYP20A1	CSNK1E
RAPGEF3	TMEM92	RAPGEF3
GRK5	TTC16	GRK5
APOBEC3C	CPE	APOBEC3C
PCDH7	HECTD4	PCDH7
MROH8	GPR39	MROH8
TMUB2	FGF5	TMUB2
PLPP3	MXRA7	PLPP3
SERINC2	BMP2	SERINC2
GALE	ZCCHC14	GALE
NHS	MOB3A	NHS
LACC1	HMGA2	LACC1
SIX2	DDX58	SIX2
CDCA7	MAN1A1	CDCA7
LPAR1	SHMT1	LPAR1
GATA6		GATA6
ADAM8		ADAM8
DIS3L		DIS3L
FGF2		FGF2
AVPI1		AVPI1
NUDT5		NUDT5
TFAP4		TFAP4
CDH13		CDH13
SLC9A9		SLC9A9
RGS20		RGS20
MAML2		MAML2
MTSS1		MTSS1
GBE1		GBE1
COPS8		COPS8
TNC		TNC
MCC		MCC
FLI1		FLI1
PTPN14		PTPN14
CEBPD		CEBPD
PCDHGC5		PCDHGC5
CYYR1		CYYR1
TNFRSF10A		TNFRSF10A
DHRS4L1		DHRS4L1
PPP1R13L		PPP1R13L
TSPYL5		TSPYL5
ZNF750		ZNF750
PDK4		PDK4
CBX5		CBX5
VCAN		VCAN
TNFRSF10B		TNFRSF10B
HIPK2		HIPK2
FNDC3B		FNDC3B
CAMK2D		CAMK2D
HNRNPF		HNRNPF
AKR1C1		AKR1C1
IL15		IL15
SAMD4A		SAMD4A
TRIM47		TRIM47
HES1		HES1
SPOCK2		SPOCK2
NRROS		NRROS
SPIRE1		SPIRE1
TRAF5		TRAF5
GNAI2		GNAI2
TLR2		TLR2
MEST		MEST
C7orf61		C7orf61
HAGHL		HAGHL
SPECC1		SPECC1
PLXNB1		PLXNB1
FBXW7		FBXW7
CCDC57		CCDC57
CST3		CST3
E2F7		E2F7
PER2		PER2
SPEM1		SPEM1
ZNF219		ZNF219
ZEB1		ZEB1
DBI		DBI
IDH3G		IDH3G
B4GALT1		B4GALT1
TXN		TXN
AFF1		AFF1
NFKB1		NFKB1
FPGS		FPGS
DNAJB2		DNAJB2
TSPAN4		TSPAN4
C5orf38		C5orf38
ZNF274		ZNF274
TXLNA		TXLNA
ALOX5		ALOX5
TBC1D5		TBC1D5
GATAD2B		GATAD2B
CAMK1D		CAMK1D
NEDD4		NEDD4
ELF4		ELF4
RARG		RARG
TRIOBP		TRIOBP
SCMH1		SCMH1
TM9SF4		TM9SF4
IFIT2		IFIT2
TPM4		TPM4
PVR		PVR
CX3CL1		CX3CL1
B9D1		B9D1
ANGPTL4		ANGPTL4
PLIN2		PLIN2
TP73		TP73
LTBP1		LTBP1
LMO4		LMO4
PRDM5		PRDM5
DMPK		DMPK
TADA2B		TADA2B
FAM46A		FAM46A
ATAD3A		ATAD3A
PNKD		PNKD
PAICS		PAICS
RNF217		RNF217
ZNF341		ZNF341
DSC3		DSC3
IFITM3		IFITM3
STAT6		STAT6
AGMO		AGMO
ZC3H4		ZC3H4
APOL6		APOL6
INAVA		INAVA
CPNE8		CPNE8
TPBG		TPBG
RDH13		RDH13
AKR1C2		AKR1C2
GPNMB		GPNMB
AP5S1		AP5S1
FTSJ1		FTSJ1
SLC7A11		SLC7A11
GPSM1		GPSM1
KCTD12		KCTD12
OTUD1		OTUD1
PLPP2		PLPP2
TENM4		TENM4
CXCL3		CXCL3
GSAP		GSAP
SLC39A8		SLC39A8
SEMA4B		SEMA4B
UCHL1		UCHL1
CCND1		CCND1
MRPL24		MRPL24
PKP1		PKP1
AIMP2		AIMP2
SERPINE2		SERPINE2
MICALL1		MICALL1
ZNF787		ZNF787
ACVR2B		ACVR2B
RANBP9		RANBP9
S1PR5		S1PR5
ADM		ADM
CD3EAP		CD3EAP
LDLR		LDLR
CREB3		CREB3
TBK1		TBK1
NNMT		NNMT
LRMP		LRMP
TOX		TOX
RHOBTB1		RHOBTB1
MAGI2		MAGI2
ARMC10		ARMC10
IRAK3		IRAK3
ZNF280D		ZNF280D
ACVR1		ACVR1
FIZ1		FIZ1
FAM110B		FAM110B
SLC25A37		SLC25A37
DAPP1		DAPP1
FASN		FASN
FDXACB1		FDXACB1
RAVER2		RAVER2
TRIP6		TRIP6
NUP50		NUP50
MECOM		MECOM
TRIB1		TRIB1
ZNF503		ZNF503
TMEM216		TMEM216
PEX5		PEX5
PER1		PER1
ZNF385A		ZNF385A
KAZN		KAZN
NOL3		NOL3
VHL		VHL
ATP9B		ATP9B
TRIM35		TRIM35
RHOC		RHOC
PPA2		PPA2
ARL6IP5		ARL6IP5
IL32		IL32
SMC3		SMC3
SPTBN1		SPTBN1
CSGALNACT2		CSGALNACT2
GABARAPL1		GABARAPL1
TBXAS1		TBXAS1
G6PD		G6PD
TLDC1		TLDC1
ANTXR1		ANTXR1
PTX3		PTX3
IRX2		IRX2
ARSI		ARSI
HGSNAT		HGSNAT
ANP32B		ANP32B
PFDN2		PFDN2
HOMER3		HOMER3
CTU2		CTU2
CA9		CA9
SEMA3C		SEMA3C
KAT6B		KAT6B
ENO1		ENO1
ACSL4		ACSL4
PLK2		PLK2
ADGRA3		ADGRA3
TUBB6		TUBB6
PCDH18		PCDH18
LOX		LOX
NOTCH1
ST8SIA1
THSD1
CSPG4
GPCPD1
DGKH
ARHGEF28
CD58
RAI14
NDST1
TIGD2
PHLDA2
FGF13
PXDN
DENND6B
TAPBPL
NALCN
DBN1
SLC25A43
VDAC2
RUFY3
SMIM19
CYP2J2
THTPA
KBTBD2
GPHN
RTL6
MEMO1
PKIB
TMEM136
SSNA1
UNG
HOXB2
NONO
RBM3
SMPD4
FAM13A
P2RY1
GEM
PNMA1
KDR
GALNT18
NR1D2
ST5
NAB1
OSBPL3
IRS2
EFNA1
ITGB4
PARP8
GPX1
PAQR7
MAP2K7
FABP5
SRGAP1
TMEM173
TMA16
EMP3
PID1
BCL2L1
CASP4
EVA1A
HSPD1
KRT8
GLUL
ADGRF3
TAF6
AGMAT
MT1X
MAP3K20
MLPH
PYY
ANPEP
ITGB1
SLFN5
MCTP1
RASEF
RARRES3
SLC25A22
ACSF3
NCAPG2
CREM
TMEM251
PLCD1
SQOR
SZT2
CD24
PPL
CCND3
ERF
MPP3
RRP12
ZYX
CSNK1D
SLC6A15
DUSP14
UBE2Q2
PAPSS2
CA11
ACOX1
LIF
PLEKHA2
2021-09-10
SUPT3H
ABHD14A
DDX1
CLCN7
APBB3
DDB2
REV3L
SCN9A
RFFL
DNAL4
ST6GAL1
PLXDC2
SEC62
GRB7
ABR
RCSD1
GPD2
NME4
ATXN3
ASAH1
COQ7
SPHK2
ZMYM6
PRSS12
PLEKHN1
ELAC1
SMARCC1
ASPH
IER5L
SPATA13
CEP41
AGTRAP
TMEM95
NT5C
RAP1GDS1
KAT5
CDV3
KHNYN
PKM
FTH1
THBS1
TSPAN14
DHRS13
C12orf49
VDAC1
ZMYND8
MID1
CPA4
ATP5F1D
UBL4A
ANAPC15
RFC4
COG5
EXOC3-AS1
SLC39A10
TMEM184B
CDH11
MET
ELL2
MCM4
GNA13
RASSF3
UBE2W
ELP5
APBA1
MPZL2
ZNF644
SUSD6
ACTN1
ACSL5
SLC35F5
DYNLT1
C5orf24
AKAP2
RHOBTB3
EFHD2
DDI2
SRPX
CHD3
TOPBP1
RHOB
PREP
ID1
PSD3
SH3TC1
OCIAD2
UCK2
ARID1B
HS3ST3B1
EIF3J
UNK
RBM43
PLXNB2
DLX2
JPT2
LPP
BTBD6
STARD13
CPPED1
SLC36A4
LPAR3
NEDD4L
WNT7A
ELMSAN1
DRAM1
CAST
MRPL14
MAMDC4
CHCHD4
SULT1A1
PANK2
UBE2R2
BORCS8-MEF2B
BORCS8
NME2
CDK6
IPMK
HNRNPK
FAM213B
JMJD8
DST
SP110
OPHN1
GJC1
CLUH
UGCG
NOX5
SPESP1
CATSPERG
SFN
COX19
PLEKHA5
GRINA
SPIN1
TMEM30A
CCT3
IL15RA
SETMAR
PTAFR
RASSF1
CLN6
PGK1
MYL12B
SYNE2
MTHFR
PAK1
ACYP2
KIF27
CPQ
IRF2
DKK3
RELA
NFIC
SCO2
SWAP70
ODC1
LRP10
ARTN
PDCD4
LRFN4
RAB34
RNF150
IBA57
SETD6
APRT
TRAM1
ANKRD33B
OLFML2A
WDR81
RTN4
SDC1
CD55
ATXN1
PRKCI
EML1
AK1
PRPSAP1
RTP4
MGAT1
HHAT
TFCP2L1
AK4
DDX60
HSF1
TARS
SRM
BTF3L4
CDKN1C
ANXA11
SOCS5
GALNT7
SPATA24
VAMP8
HACD1
HCAR3
DUSP3
TRIM29
MAP1B
ZNF367
KCNAB2
MTPAP
NME1-NME2
NME1
GPR108
OTUD5
FGGY
GNB4
ATF5
SMYD5
SRD5A3
SEMA3A
SLC11A2
FLRT3
SHB
CTNNA1
RPL13
PLA2R1
LPXN
TUBA1C
EIF4EBP2
DDX21
HCAR2
ALKBH2
LDHA
RHOD
TTLL12
CAMK2N1
GPR20
GRAMD1C
TCTN3
TCP11L1
NTPCR
PRKAA1
PFN1
ST3GAL3
STAG2
MCFD2
DEAF1
ZNF333
ADRB2
MYH9
ZNF747
ACOT9
CEP83
SPSB1
STAG1
PIR
APOL2
PTPRU
EZR
SMIM13
ELP6
SF3A2
COL17A1
SRGAP3
C3
BLCAP
YDJC
EHD2
FILIP1L
ALDH1L1
PPP5C
C11orf91
B4GALT6
FOXC2
TWIST2
LENG9
HIP1R
ACOT2
CLOCK
PRKAR1A
PLEKHB2
METTL5
GM2A
CKAP4
POPDC3
POU2F1
CNN3
CDC25B
PDE7A
ARHGEF2
BRIX1
DARS
NLRP1
ZNF655
MZF1
GCN1
U2AF1L4
VAV2
COL7A1
IMPA2
RBBP4
CDC42
LAMC1
ARRDC2
INF2
RAC2
NCOA2
EIF4EBP1
USP6NL
AIG1
DCTN2
RSL1D1
RIF1
GABRE
FAM214B
ATXN7L1
FUCA2
GRK3
MYO19
RPS8
TOB1
GPX4
PFKFB3
AKR1E2
CNOT3
SELENOP
INTS13
PRMT3
CHN1
SOD2
SGCE
BAG5
GALNT10
WDR44
PANK1
WDSUB1
AP2B1
RTL8B
NR2C1
H6PD
CCDC122
SERPINF1
CLDN11
HTATIP2
CHRAC1
C20orf194
HEY1
PYCR3
MR1
GSN
C16orf86
CHCHD2
FER
MRPS2
CTSC
XIAP
RRAS2
OAS3
UBLCP1
RAB11B
RBX1
VAMP2
MCU
ADAMTS1
TRABD2A
ZNF354A
XPC
STOX1
RRS1
MIEF2
ATRAID
BIN3
FOPNL
CYB5R3
TRIB3
TBC1D14
IGFBP7
EIF5
PER3
MRPL45
NCOA4
CALD1
STX8
COPS7A
SZRD1
RPS29
TFB2M
PHLDA1
REEP4
NABP1
RNH1
CSAD
WARS2
F2RL1
SPEN
URB1
BCAR1
SLC35G2
TMC6
PHLPP1
TRPC6
GALNT14
SPOCK1
TEF
DHRS12
LYRM1
KPNB1
LRRC4C
CYB561
TSEN34
KDM3B
AGK
ZNF687
FBXO44
HERC5
THAP10
GSDMD
CAPNS1
UQCRFS1
MTX3
GFOD1
PCGF1
RCN2
ECHDC3
UHRF1
RBP1
FAM218A
NRBP2
PTK2
MSN
USP3
MFGE8
TNRC18
SLC35C1
C1orf122
ZBTB10
TCAIM
VPS36
BEX3
CREBRF
C8orf37
ITPA
TREX1
RNF207
NPC1
MTHFD2L
NTN4
IFI16
NRP2
CYFIP1
ELOVL5
MCAT
ENDOD1
RAD50
LAG3
SEC14L2
DUSP6
GCLM
GSTM1
KLF4
KANK2
AURKB
KHDC1
RPUSD1
SHC1
LCLAT1
RRAD
RPS7
EFNB1
LUC7L
C12orf56
PRDM2
PPM1G
BCL7B
CCT5
DCAF11
C9orf40
DIDO1
SIK1
RASL11B
GCLC
ITPRIPL2
SH3BGRL3
FAM131A
CUX1
ATP11B
EPS15
SMAD4
MAPK6
HNRNPUL2
CD151
P4HA2
NID1
NUAK2
GADD45G
RYBP
PCOTH
MDH2
LAMB1
PFDN4
STK10
CTDSP1
ERMAP
CEPT1
TMEM144
SPIN3
VKORC1L1
C1orf50
HGS
FSCN1
TRIM22
DIEXF
TANK
UBXN8
ZDHHC17
TMEM51
ACOT1
ZC3H6
CCNL1
RBMS2
GTF3C4
NUDT7
GPATCH4
PTBP1
SS18L1
ARSD
ZNF3
ADSL
CD2AP
C9orf64
ATP6V1B2
NDUFAF8
EMG1
PARP4
PTPN23
ETF1
CARHSP1
STAT3
TWIST1
LDLRAD3
CA8
MAP4K4
N4BP3
RET
PPIL6
TM9SF3
CTSB
B9D2
ARRDC3
SLC25A13
RDX
MTMR2
SARS2
TUBGCP3
TRAPPC5
LRR1
PYGO2
CDKN1A
CIC
MIER3
UBE2H
ALG3
SLC25A26
ANKRD65
FARSB
ATIC
GCNT2
PERP
CRLS1
EIF4G1
TRIM21
CFAP300
SYNCRIP
POLE2
VAMP3
TUBA4A
WASL
S100A6
CPE
SH3BP2
ITGA5
ARSG
NPTXR
RIPOR1
TKFC
OASL
KPNA4
ETNK2
ZBTB39
ZMYM2
ALDH4A1
CLPTM1
SLC38A2
FAM86C1
DNAJC18
SMOC1
BOD1L1
THAP9
RUNX3
ZNF594
C5orf63
DUS3L
BNIP3L
ITGB3
TMA7
RPS24
UBE2J1
ACTB
DNLZ
F2R
ECHDC1
APC
PTPRG
DHRS4L2
COX5A
S100A13
PAFAH1B2
POGK
PLXNA2
CCDC6
AK2
ATG5
ELL3
MCL1
ACAA2
SCAMP4
DDX60L
FAM160A1
CNBP
POLDIP3
GPR63
DOCK1
ZNF75A
DPM2
FEM1A
KDM5B
RPUSD4
EVC
CCDC137
PCIF1
PEG10
TRUB1
DMD
MYO1G
CD276
GEMIN8
MUS81
ACBD6
NDUFA7
EIF5A
DEF6
NARF
ZFPL1
SACS
EFCAB6
MTRF1L
MRPS28
SAT1
MMP14
SLC25A1
PPIF
C16orf74
HK1
MBNL2
GSTO1
GNAQ
TYMS
RBFOX2
HDAC2
RPL14
FNDC3A
RNF213
SCAF8
CARS2
ZWILCH
DHX37
NOL8
JAGN1
HIVEP2
LYN
SUN1
CCDC8
SYPL1
HBP1
CIRBP
RAB38
PDGFRB
SIAH1
UBE2I
UBFD1
TMEM231
GTF3A
MMP2
BUB1B
ZNF37A
RNASEH1
UGP2
HSP90AA1
ATF3
IFT140
PPP2R3C
SH3D21
MRPS27
HDDC2
MINDY4
JAG1
ISG20
PPP2R2A
ADAT3
TFPI2
2021-09-02
NQO1
COQ9
DUT
ARFGAP2
POFUT2
TFCP2
AIP
PTRHD1
ZSCAN22
CXCL5
POLE3
INA
CSK
PPP1R12A
IGF2BP2
TCERG1
STRN3
CTPS1
CA13
PTPN2
AP4M1
PMVK
ADH5
MCM2
MDM2
LY6E
CHST11
FBXO11
NFYB
AZI2
PRDX4
SUPV3L1
WDR82
PRICKLE3
APOBEC3F
PLA2G4C
TCTEX1D2
ARAF
ZHX2
SLC37A4
RANBP10
RBBP8
DDX6
GNAI1
PSMD13
CTSL
GNAL
TFE3
PNMA8A
CHPT1
FADS1
RPS26
VPS26A
HDGFL2
SERBP1
KANSL3
LTBR
ALDOA
MINPP1
CCDC120
DCTN4
EPHX1
STXBP2
SLC26A2
IFT88
TCF25
ZNF416
PFKP
LBX2
BATF2
RARA
ZNF33B
TRIM7
PSMD14
CAPN10
RGS19
TBRG4
NOTCH2
L3HYPDH
BLVRB
FBLN1
SHROOM2
ARMC5
LTB4R
LIG3
UBE2M
NDUFB2
FRS2
DET1
MED11
TAF4
AP1S3
RNF19A
METTL17
MRPL28
CSDE1
RBPJ
CAVIN1
SRD5A1
ZSCAN12
EIF4B
METTL23
COL12A1
SP100
PHB
RAN
SP2
DPP8
SBF2
HES7
PPP2R5A
SNRPA1
HDAC10
TMCO6
SNRPA
TIMP1
BTBD7
ZSCAN31
EIF1AX
VSNL1
POLI
PSAP
DPYSL2
ATG10
TCEAL4
PPP2CB
ERN1
AP3D1
TWNK
SMARCA4
HNRNPC
EIF1
FBXO2
RGS9BP
MTMR9
LDHB
PBLD
ZBTB43
POLR3F
ZFAND1
POLR3H
ATF1
MAML3
DTD2
UFD1
CCNT2
VRK1
PSMB10
NOP53
SNRPB
RNF13
MLKL
IRF1
USP22
LINC01465
ARF6
GNG5
ZFP36
MRPS25
ITGA6
LAMA5
DNAJB5
BTG3
BCL7A
FAM181B
KCNK6
SNX24
KLF12
TEAD4
SPIDR
USP51
STK39
SMAD2
BLMH
ZFR
ZNF471
SERINC1
EIF3M
ZNHIT6
ACADM
GPX7
TVP23B
PARK7
RAB22A
FAM76B
SMIM15
YTHDF2
ZNFX1
SLC3A2
AFAP1
TCF7L2
RHOA
POLR2L
DAZAP2
POLD2
ARHGAP10
RNF130
ATXN7L2
CHTOP
GNB5
REL
MORF4L1
MANBAL
ENOX2
PLS3
CHMP1B
PCCA
UBE2V2
IRX1
KDM7A
NLN
XRN2
TMSB10
PTGR1
NRAS
FBXL4
RAP2B
PLEK2
GNPTG
ELK1
TPRA1
HEATR6
PDCD6IP
VAPA
WEE1
ZNF766
PPRC1
TMEM18
KANSL1
ATAD2B
ETFBKMT
WRNIP1
GAK
TARBP2
CTNS
MAD2L1BP
COL22A1
DTX3L
KPNA3
POLR1C
PFDN1
LGALS1
JUP
VPS37B
LIMK2
SNRPE
RPL39L
ARMT1
TOP1
INTS7
IL13RA1
MICU2
PPP1R36
RANBP17
IL4I1
CCT2
EXOSC5
ANAPC11
RCL1
SLC7A6
CAD
POSTN
NAIF1
NRCAM
ZNF146
TRIQK
NR1H2
C9orf43
CEMIP2
LRP11
KAT6A
EFEMP2
GNB2
ANO8
TSC22D2
NET1
C1D
BANP
RPTOR
GEMIN4
XPO1
MRPL21
BLVRA
SP140L
PARP6
DBF4
PPP6C
ORAI1
RPL31
LYPD3
EXOSC7
FOXO1
EMB
KANSL2
TUBB3
TLE3
CIAPIN1
FIBP
SF3B1
CHD9
KIF9
ZBTB24
GUK1
RFESD
HNRNPLL
ZNF436
CCND2
FBXO30
[truncated: 8,064 more rows]
