# Supplementary material for: Promoter-specific changes in initiation, elongation, and homeostasis of histone H3 acetylation during CBP/p300 inhibition
Source: eLife journal article supplement (doi:10.7554/elife.63512), 2021-03-11
Supplement: supp [file elife-63512-supp-v1.zip]

## a) 2XPI Promoter Proximal de novo motifs

| Motif                                                                             | TF (-logP)  |
|-----------------------------------------------------------------------------------|-------------|
|  | SRF (13)    |
|  | PRDM1 (13)  |
|  | TFAP2A (12) |
|  | SMAD2 (11)  |
|  | T-Box (11)  |

## 2XIn Promoter Proximal de novo motifs

| Motif                                                                               | TF (-logP) |
|-------------------------------------------------------------------------------------|------------|
|  | HLTF (14)  |
|  | ARNT (12)  |
|  | NKX6-3(11) |
|  | HBP1 (11)  |
|  | SPI1 (11)  |

## b) 2XPI GO Biological Processes

| TermID     | Term                                    | logP       |
|------------|-----------------------------------------|------------|
| GO:0001568 | blood vessel development                | -56.171899 |
| GO:0001944 | vasculature development                 | -55.560821 |
| GO:0072359 | circulatory system development          | -55.212132 |
| GO:0072358 | cardiovascular system development       | -55.212132 |
| GO:0051716 | cellular response to stimulus           | -55.157432 |
| GO:0048523 | negative regulation of cellular process | -53.700532 |
| GO:0048514 | blood vessel morphogenesis              | -53.595828 |
| GO:0009653 | anatomical structure morphogenesis      | -52.562521 |
| GO:0044707 | single-multicellular organism process   | -52.562053 |
| GO:0032501 | multicellular organismal process        | -52.339701 |
| GO:0050896 | response to stimulus                    | -52.012057 |
| GO:0048513 | organ development                       | -51.023085 |
| GO:0007275 | multicellular organismal development    | -49.428051 |
| GO:0048731 | system development                      | -49.206795 |

## 2XIn GO Biological Processes

| TermID     | Term                                      | logP       |
|------------|-------------------------------------------|------------|
| GO:0048523 | negative regulation of cellular process   | -62.916558 |
| GO:0048519 | negative regulation of biological process | -60.806442 |
| GO:0050793 | regulation of developmental process       | -50.757228 |
| GO:0048583 | regulation of response to stimulus        | -50.394575 |
| GO:0009966 | regulation of signal transduction         | -50.278048 |
| GO:0009888 | tissue development                        | -47.970636 |
| GO:0009653 | anatomical structure morphogenesis        | -47.576852 |
| GO:0001944 | vasculature development                   | -47.525648 |
| GO:0001568 | blood vessel development                  | -47.136352 |
| GO:0048518 | positive regulation of biological process | -46.541212 |
| GO:0043067 | regulation of programmed cell death       | -45.988059 |
| GO:0010941 | regulation of cell death                  | -45.470952 |
| GO:0048856 | anatomical structure development          | -44.358016 |
| GO:0042127 | regulation of cell proliferation          | -44.204512 |
