# Supplementary material for: Promoter-specific changes in initiation, elongation, and homeostasis of histone H3 acetylation during CBP/p300 inhibition
Source: eLife journal article supplement (doi:10.7554/elife.63512), 2021-03-11
Supplement: supp [file elife-63512-supp-v1.zip]

a)

Average H3K9ac at typical enhancers

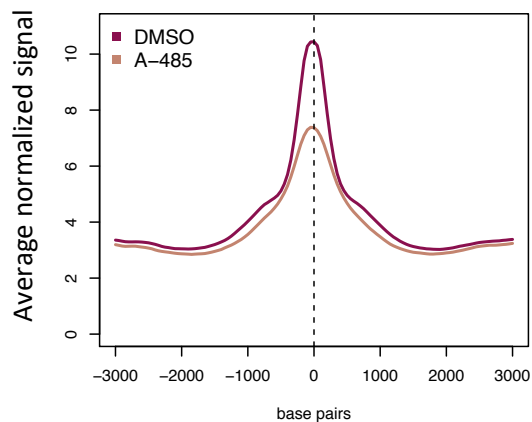

Average BRD4 at typical enhancers

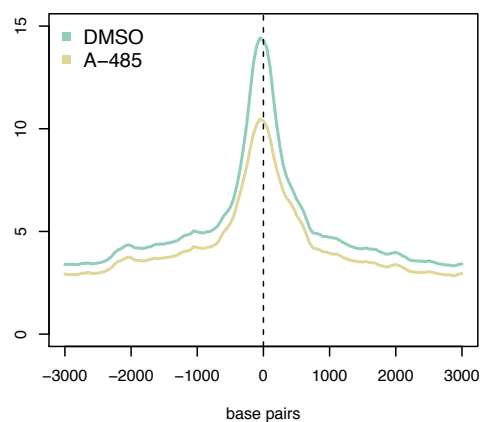

Average H3K9ac at superenhancers

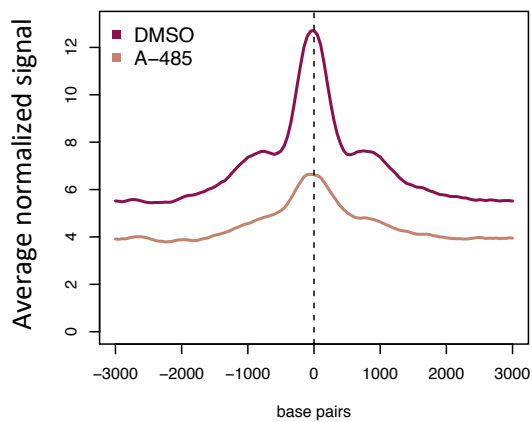

Average BRD4 at superenhancers

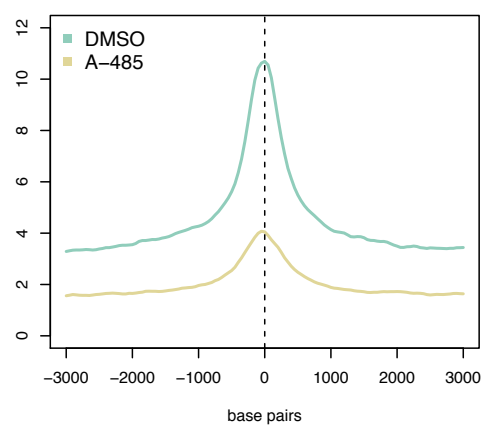

b)

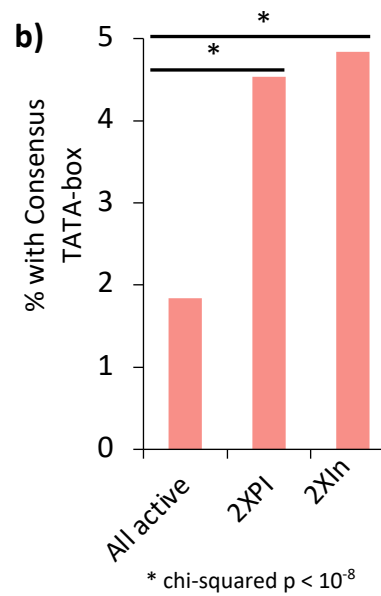

\* chi-squared  $p < 10^{-8}$
