# Supplementary material for: Promoter-specific changes in initiation, elongation, and homeostasis of histone H3 acetylation during CBP/p300 inhibition
Source: eLife journal article supplement (doi:10.7554/elife.63512), 2021-03-11

a)

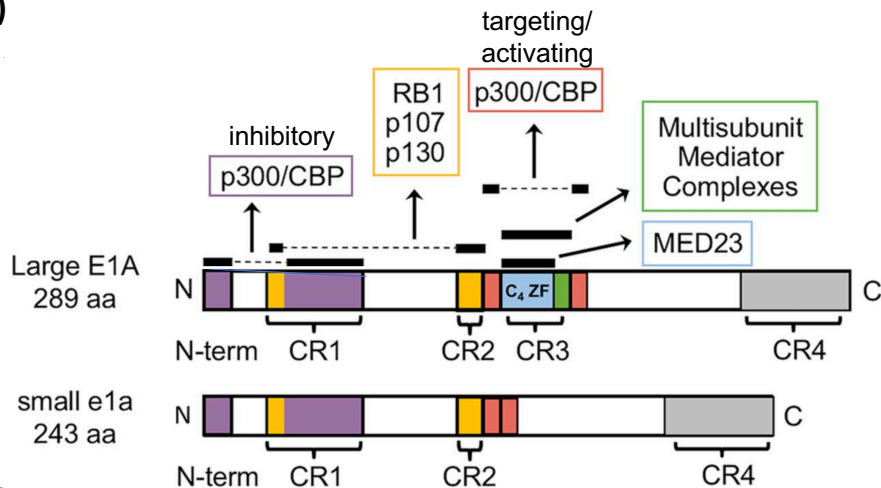

b)

WT E1A

121 125 130 135 140 145 150 155 160 165 170 175 180 185 190 195 200

DLTCHEAGFPPSDDEEGEEFVLDYVEHPGHGCRSCHYHRRNTGDPDIMCSLCYMRTCGMFVYSPVSEEPEPEPEPEPEPEPARPTR

DM(133-138A;189-200A)

121 125 130 135 140 145 150 155 160 165 170 175 180 185 190 195 200

DLTCHEAGFPPSAAAAAAGEEFVLDYVEHPGHGCRSCHYHRRNTGDPDIMCSLCYMRTCGMFVYSPVSAAAAAAAAAAARPTR

c)

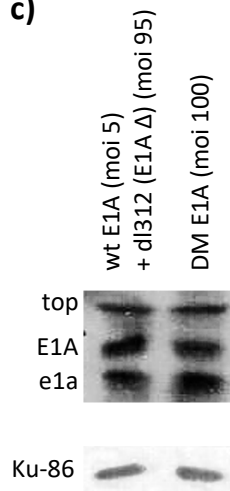

Supplement: supp [file elife-63512-supp-v1.zip]
