# Supplementary material for: Promoter-specific changes in initiation, elongation, and homeostasis of histone H3 acetylation during CBP/p300 inhibition
Source: eLife journal article supplement (doi:10.7554/elife.63512), 2021-03-11
Supplement: supp [file elife_poa_e63512_Figure_5_source_data_1.xlsx]

## Sheet: Sheet1
Figure 5b-source data 1
All Active Promoters			2XPI			2XIn
NM_000759	CSF3		NM_017988	SCYL2		NM_000759	CSF3
NM_001127641	LAMB3		NM_006169	NNMT		NM_001127641	LAMB3
NM_001139443	BEST1		NM_000576	IL1B		NM_001139443	BEST1
NM_001166169	NEK6		NM_194314	ZBTB41		NM_001166169	NEK6
NM_001178147	CSF3		NM_203286	NECTIN1		NM_001178147	CSF3
NM_002820	PTHLH		NM_139072	DNER		NM_002820	PTHLH
NM_002962	S100A5		NM_018440	PAG1		NM_002962	S100A5
NM_004183	BEST1		NM_005627	SGK1		NM_004183	BEST1
NM_004293	GDA		NM_173354	SIK1		NM_004293	GDA
NM_005328	HAS2		NM_003467	CXCR4		NM_005328	HAS2
NM_018280	PRR34		NM_001113546	LIMA1		NM_018280	PRR34
NM_030629	CMIP		NM_016357	LIMA1		NM_030629	CMIP
NM_172219	CSF3		NM_025195	TRIB1		NM_172219	CSF3
NM_172220	CSF3		NM_001135242	NDRG1		NM_172220	CSF3
NM_198965	PTHLH		NM_006096	NDRG1		NM_198965	PTHLH
NM_207311	BICDL1		NM_032945	TNFRSF6B		NM_207311	BICDL1
NM_001166002	APOBEC3H		NM_001034852	SMOC1		NM_001166002	APOBEC3H
NM_001166003	APOBEC3H		NM_022137	SMOC1		NM_001166003	APOBEC3H
NM_181773	APOBEC3H		NM_058229	FBXO32		NM_181773	APOBEC3H
NM_001166004	APOBEC3H		NM_001161560	TNIK		NM_001166004	APOBEC3H
NM_000691	ALDH3A1		NM_001161561	TNIK		NM_000691	ALDH3A1
NM_024781	CCDC102B		NM_001161562	TNIK		NM_024781	CCDC102B
NM_001018011	ZBTB16		NM_001161563	TNIK		NM_001018011	ZBTB16
NM_001161705	BFSP1		NM_001161564	TNIK		NM_001161705	BFSP1
NM_033260	FOXQ1		NM_001161565	TNIK		NM_033260	FOXQ1
NM_201381	PLEC		NM_001161566	TNIK		NM_201381	PLEC
NM_001146068	CAPN2		NM_015028	TNIK		NM_001146068	CAPN2
NM_001135167	ALDH3A1		NM_020796	SEMA6A		NM_001135167	ALDH3A1
NM_173209	TGIF1		NM_001005502	CPM		NM_173209	TGIF1
NM_001077397	IRF2BP2		NM_198320	CPM		NM_001077397	IRF2BP2
NM_182972	IRF2BP2		NM_014957	DENND3		NM_182972	IRF2BP2
NM_181597	UPP1		NM_025208	PDGFD		NM_181597	UPP1
NM_133447	AGAP11		NM_033135	PDGFD		NM_133447	AGAP11
NM_144728	DUSP10		NM_007207	DUSP10		NM_144728	DUSP10
NM_001172895	CAV1		NM_144729	DUSP10		NM_001172895	CAV1
NM_002966	S100A10		NM_001135241	AKR1C2		NM_002966	S100A10
NM_022036	GPRC5C		NM_203285	NECTIN1		NM_022036	GPRC5C
NM_207499	PTCHD4		NM_001143824	SLC38A4		NM_207499	PTCHD4
NM_001013732	PTCHD4		NM_018018	SLC38A4		NM_001013732	PTCHD4
NM_057158	DUSP4		NM_006633	IQGAP2		NM_057158	DUSP4
NM_000600	IL6		NM_002855	NECTIN1		NM_000600	IL6
NM_032211	LOXL4		NM_003068	SNAI2		NM_032211	LOXL4
NM_002048	GAS1		NM_005239	ETS2		NM_002048	GAS1
NM_054110	GALNT15		NM_021135	RPS6KA2		NM_054110	GALNT15
NM_173211	TGIF1		NM_001146261	SYT14		NM_173211	TGIF1
NM_001080826	PRAG1		NM_001146262	SYT14		NM_001080826	PRAG1
NM_001135168	ALDH3A1		NM_001146264	SYT14		NM_001135168	ALDH3A1
NM_148177	FBXO32		NM_153262	SYT14		NM_148177	FBXO32
NM_001005752	GJB3		NM_006622	PLK2		NM_001005752	GJB3
NM_198086	AJUBA		NM_004163	RAB27B		NM_198086	AJUBA
NM_170736	KCNJ15		NM_020311	ACKR3		NM_170736	KCNJ15
NM_003709	KLF7		NM_001159387	B4GALNT2		NM_003709	KLF7
NM_001177880	SYT12		NM_003174	SVIL		NM_001177880	SYT12
NM_004878	PTGES		NM_000214	JAG1		NM_004878	PTGES
NM_003786	ABCC3		NM_001032281	TFPI		NM_003786	ABCC3
NM_001144070	ABCC3		NM_000902	MME		NM_001144070	ABCC3
NM_001145459	HOPX		NM_001177381	CPEB2		NM_001145459	HOPX
NM_139211	HOPX		NM_001177382	CPEB2		NM_139211	HOPX
NM_003633	ENC1		NM_001177383	CPEB2		NM_003633	ENC1
NM_022164	TINAGL1		NM_001177384	CPEB2		NM_022164	TINAGL1
NM_001006624	PDPN		NM_182485	CPEB2		NM_001006624	PDPN
NM_001006625	PDPN		NM_182646	CPEB2		NM_001006625	PDPN
NM_006006	ZBTB16		NM_003937	KYNU		NM_006006	ZBTB16
NM_005708	GPC6		NM_000245	MET		NM_005708	GPC6
NM_001166212	CLCF1		NM_001127500	MET		NM_001166212	CLCF1
NM_001168388	CITED2		NM_007287	MME		NM_001168388	CITED2
NM_023915	GPR87		NM_002260	KLRC2		NM_023915	GPR87
NM_017734	PALMD		NM_005168	RND3		NM_017734	PALMD
NM_001159575	SCNN1A		NM_001145777	FKBP5		NM_001159575	SCNN1A
NM_001109974	SYNPO		NM_001033117	SRGAP3		NM_001109974	SYNPO
NM_007286	SYNPO		NM_014850	SRGAP3		NM_007286	SYNPO
NM_001127240	BBC3		NM_032873	UBASH3B		NM_001127240	BBC3
NM_001127241	BBC3		NM_004117	FKBP5		NM_001127241	BBC3
NM_001127242	BBC3		NM_001145776	FKBP5		NM_001127242	BBC3
NM_001134439	PHLDB2		NM_000951	PRRG2		NM_001134439	PHLDB2
NM_000168	GLI3		NM_014331	SLC7A11		NM_000168	GLI3
NM_014707	HDAC9		NM_033450	ABCC10		NM_014707	HDAC9
NM_178423	HDAC9		NM_001032998	KYNU		NM_178423	HDAC9
NM_001168389	CITED2		NM_173644	C20orf197		NM_001168389	CITED2
NM_001113492	2021-09-09		NM_001001991	PAMR1		NM_001113492	2021-09-09
NM_178519	LINC00482		NM_015430	PAMR1		NM_178519	LINC00482
NM_001113495	2021-09-09		NM_001005619	ITGB4		NM_001113495	2021-09-09
NM_201431	RASSF6		NM_014751	MTSS1		NM_201431	RASSF6
NM_001160354	LY6K		NM_002015	FOXO1		NM_001160354	LY6K
NM_001160355	LY6K		NM_001162895	KIAA0040		NM_001160355	LY6K
NM_017527	LY6K		NM_014656	KIAA0040		NM_017527	LY6K
NM_031415	GSDMC		NM_000891	KCNJ2		NM_031415	GSDMC
NM_001015881	TSC22D3		NM_001130852	CBLC		NM_001015881	TSC22D3
NM_001166168	NEK6		NM_012116	CBLC		NM_001166168	NEK6
NM_022136	SAMSN1		NM_001104548			NM_022136	SAMSN1
NM_182557	BCL9L		NM_004431	EPHA2		NM_182557	BCL9L
NM_001038	SCNN1A		NM_005178	BCL3		NM_001038	SCNN1A
NM_006291	TNFAIP2		NM_001769	CD9		NM_006291	TNFAIP2
NM_001037339	PDE4B		NM_001430	EPAS1		NM_001037339	PDE4B
NM_016205	PDGFC		NM_021229	NTN4		NM_016205	PDGFC
NM_002467	MYC		NM_006287	TFPI		NM_002467	MYC
NM_002961	S100A4		NM_001024844	CD82		NM_002961	S100A4
NM_019554	S100A4		NM_002231	CD82		NM_019554	S100A4
NM_007283	MGLL		NM_006079	CITED2		NM_007283	MGLL
NM_015603	CCDC9		NM_002214	ITGB8		NM_015603	CCDC9
NM_003244	TGIF1		NM_022358	KCNK15		NM_003244	TGIF1
NM_020168	PAK6		NM_001553	IGFBP7		NM_020168	PAK6
NM_002250	KCNN4		NM_001024628	NRP1		NM_002250	KCNN4
NM_139165	RAET1E		NM_001024629	NRP1		NM_139165	RAET1E
NM_198392	TCF21		NM_198469	MORN5		NM_198392	TCF21
NM_003206	TCF21		NM_001185106	PLCXD2		NM_003206	TCF21
NM_017611	SLC43A3		NM_153268	PLCXD2		NM_017611	SLC43A3
NM_003937	KYNU		NM_004753	DHRS3		NM_003937	KYNU
NM_001032998	KYNU		NM_005655	KLF10		NM_001032998	KYNU
NM_012397	SERPINB13		NM_000137	FAH		NM_012397	SERPINB13
NM_198966	PTHLH		NM_152328	ADSSL1		NM_198966	PTHLH
NM_198964	PTHLH		NM_004103	PTK2B		NM_198964	PTHLH
NM_021101	CLDN1		NM_173174	PTK2B		NM_021101	CLDN1
NM_005556	KRT7		NM_005418	ST5		NM_005556	KRT7
NM_005178	BCL3		NM_005524	HES1		NM_005178	BCL3
NM_001100122	SBNO2		NM_032017	STK40		NM_001100122	SBNO2
NM_001083924	C1orf116		NM_001039659	IL18BP		NM_001083924	C1orf116
NM_023938	C1orf116		NM_001039660	IL18BP		NM_023938	C1orf116
NM_020747	ZNF608		NM_003567	BCAR3		NM_020747	ZNF608
NM_002276	KRT19		NM_014452	TNFRSF21		NM_002276	KRT19
NM_006909	RASGRF2		NM_024103	SLC25A23		NM_006909	RASGRF2
NM_000820	GAS6		NM_001394	DUSP4		NM_000820	GAS6
NM_016250	NDRG2		NM_001100818	PID1		NM_016250	NDRG2
NM_201535	NDRG2		NM_017933	PID1		NM_201535	NDRG2
NM_201536	NDRG2		NM_001135248	MFAP2		NM_201536	NDRG2
NM_201537	NDRG2		NM_002403	MFAP2		NM_201537	NDRG2
NM_020856	TSHZ3		NM_012242	DKK1		NM_020856	TSHZ3
NM_020182	PMEPA1		NM_012153	EHF		NM_020182	PMEPA1
NM_000240	MAOA		NM_001423	EMP1		NM_000240	MAOA
NM_022833	FAM129B		NM_001552	IGFBP4		NM_022833	FAM129B
NM_001146	ANGPT1		NM_000067	CA2		NM_001146	ANGPT1
NM_003380	VIM		NM_006006	ZBTB16		NM_003380	VIM
NM_019854	PRMT8		NM_138969	SDR16C5		NM_019854	PRMT8
NM_001031804	MAF		NM_001164664	MAST4		NM_001031804	MAF
NM_005360	MAF		NM_014722	RIPOR2		NM_005360	MAF
NM_001077241	SLC25A45		NM_005144	HR		NM_001077241	SLC25A45
NM_182556	SLC25A45		NM_018411	HR		NM_182556	SLC25A45
NM_001065	TNFRSF1A		NM_058238	WNT7B		NM_001065	TNFRSF1A
NM_014917	NTNG1		NM_001847	COL4A6		NM_014917	NTNG1
NM_014945	ABLIM3		NM_001161819	MYO1B		NM_014945	ABLIM3
NM_017787	WBP1L		NM_014632	MICAL2		NM_017787	WBP1L
NM_032865	TNS4		NM_016441	CRIM1		NM_032865	TNS4
NM_031439	SOX7		NM_006988	ADAMTS1		NM_031439	SOX7
NM_012153	EHF		NM_024429	PRKAG2		NM_012153	EHF
NM_181523	PIK3R1		NM_001145511	NFIA		NM_181523	PIK3R1
NM_001178003	WDR66		NM_001042467	MLPH		NM_001178003	WDR66
NM_153269	C20orf96		NM_024101	MLPH		NM_153269	C20orf96
NM_005429	VEGFC		NM_033641	COL4A6		NM_005429	VEGFC
NM_001549	IFIT3		NM_001562	IL18		NM_001549	IFIT3
NM_005980	S100P		NM_006504	PTPRE		NM_005980	S100P
NM_014220	TM4SF1		NM_001003794	MGLL		NM_014220	TM4SF1
NM_152367	MAB21L3		NM_001126240	TP73		NM_152367	MAB21L3
NM_022767	AEN		NM_001126241	TP73		NM_022767	AEN
NM_138966	NETO1		NM_001126242	TP73		NM_138966	NETO1
NM_201382	PLEC		NM_030912	TRIM8		NM_201382	PLEC
NM_021192	HOXD11		NM_032899	FAM83A		NM_021192	HOXD11
NM_001042388	PPP4R1		NM_001031735	IZUMO4		NM_001042388	PPP4R1
NM_005134	PPP4R1		NM_001039846	IZUMO4		NM_005134	PPP4R1
NM_152513	MEI1		NM_005489	SH2D3C		NM_152513	MEI1
NM_000172	GNAT1		NM_001002017	HCFC1R1		NM_000172	GNAT1
NM_144499	GNAT1		NM_001002018	HCFC1R1		NM_144499	GNAT1
NM_031866	FZD8		NM_017885	HCFC1R1		NM_031866	FZD8
NM_005098	MSC		NM_000828	GRIA3		NM_005098	MSC
NM_018993	RIN2		NM_007325	GRIA3		NM_018993	RIN2
NM_021738	SVIL		NM_001172411	VANGL1		NM_021738	SVIL
NM_001005498	RHBDF2		NM_138959	VANGL1		NM_001005498	RHBDF2
NM_001190707	ALS2CL		NM_021643	TRIB2		NM_001190707	ALS2CL
NM_001134437	PHLDB2		NM_002165	ID1		NM_001134437	PHLDB2
NM_006887	ZFP36L2		NM_181353	ID1		NM_006887	ZFP36L2
NM_001145144	SLC1A5		NM_032865	TNS4		NM_001145144	SLC1A5
NM_147129	ALS2CL		NM_001112717	LIMCH1		NM_147129	ALS2CL
NM_001136051	LRIG3		NM_001112718	LIMCH1		NM_001136051	LRIG3
NM_153212	GJB4		NM_014988	LIMCH1		NM_153212	GJB4
NM_030666	SERPINB1		NM_001146	ANGPT1		NM_030666	SERPINB1
NM_000043	FAS		NM_007332	TRPA1		NM_000043	FAS
NM_152871	FAS		NM_005962	MXI1		NM_152871	FAS
NM_152872	FAS		NM_001370	DNAH6		NM_152872	FAS
NM_001164615	FZD6		NM_019058	DDIT4		NM_001164615	FZD6
NM_199169	PMEPA1		NM_004235	KLF4		NM_199169	PMEPA1
NM_199170	PMEPA1		NM_198828	MAST4		NM_199170	PMEPA1
NM_032047	B3GNT5		NM_018945	PDE7B		NM_032047	B3GNT5
NM_181504	PIK3R1		NM_017823	DUSP23		NM_181504	PIK3R1
NM_032899	FAM83A		NM_001031716	NABP1		NM_032899	FAM83A
NM_207006	FAM83A		NM_182757	RNF144B		NM_207006	FAM83A
NM_018284	GBP3		NM_001042368	RALGDS		NM_018284	GBP3
NM_001008487	SLC41A3		NM_012408	ZMYND8		NM_001008487	SLC41A3
NM_018837	SULF2		NM_183047	ZMYND8		NM_018837	SULF2
NM_133468	BMPER		NM_183048	ZMYND8		NM_133468	BMPER
NM_001753	CAV1		NM_006137	CD7		NM_001753	CAV1
NM_001145157	NR2F2		NM_021977	SLC22A3		NM_001145157	NR2F2
NM_024009	GJB3		NM_001040167	LFNG		NM_024009	GJB3
NM_018421	TBC1D2		NM_001162422	ETS1		NM_018421	TBC1D2
NM_001160124	KLF6		NM_005238	ETS1		NM_001160124	KLF6
NM_001160125	KLF6		NM_002965	S100A9		NM_001160125	KLF6
NM_001300	KLF6		NM_001127717	LAMA3		NM_001300	KLF6
NM_153446	B4GALNT2		NM_198129	LAMA3		NM_153446	B4GALNT2
NM_201384	PLEC		NM_001099287	NIPAL4		NM_201384	PLEC
NM_006640	2021-09-09		NM_001172292	NIPAL4		NM_006640	2021-09-09
NM_003004	SECTM1		NM_025179	PLXNA2		NM_003004	SECTM1
NM_019089	HES2		NM_000127	EXT1		NM_019089	HES2
NM_001113547	LIMA1		NM_007204	DDX20		NM_001113547	LIMA1
NM_025194	ITPKC		NM_003641	IFITM1		NM_025194	ITPKC
NM_015183	MAST4		NM_000574	CD55		NM_015183	MAST4
NM_016203	PRKAG2		NM_001114752	CD55		NM_016203	PRKAG2
NM_198152	UTS2B		NM_001511	CXCL1		NM_198152	UTS2B
NM_001168319	EDN1		NM_012081	ELL2		NM_001168319	EDN1
NM_001955	EDN1		NM_018306	TMEM40		NM_001955	EDN1
NM_001134438	PHLDB2		NM_013261	PPARGC1A		NM_001134438	PHLDB2
NM_145753	PHLDB2		NM_001040168	LFNG		NM_145753	PHLDB2
NM_173644	C20orf197		NM_004417	DUSP1		NM_173644	C20orf197
NM_001956	EDN2		NM_173674	DCBLD1		NM_001956	EDN2
NM_138809	CMBL		NM_207006	FAM83A		NM_138809	CMBL
NM_001001924	MTUS1		NM_001102566	PCP4L1		NM_001001924	MTUS1
NM_001001925	MTUS1		NM_006200	PCSK5		NM_001001925	MTUS1
NM_003841	TNFRSF10C		NM_003595	TPST2		NM_003841	TNFRSF10C
NM_203418	RCAN1		NM_030621	DICER1		NM_203418	RCAN1
NM_021643	TRIB2		NM_001002796	MCTP1		NM_021643	TRIB2
NM_000526	KRT14		NM_001195683	TGFBR3		NM_000526	KRT14
NM_001134738	BCL6		NM_003243	TGFBR3		NM_001134738	BCL6
NM_018653	GPRC5C		NM_018948	ERRFI1		NM_018653	GPRC5C
NM_005342	HMGB3		NM_000777	CYP3A5		NM_005342	HMGB3
NM_001042646	TRAK1		NM_001080482	AJM1		NM_001042646	TRAK1
NM_001159576	SCNN1A		NM_001190482	PCSK5		NM_001159576	SCNN1A
NM_000361	THBD		NM_032572	RNASE7		NM_000361	THBD
NM_024496	IRF2BPL		NM_022073	EGLN3		NM_024496	IRF2BPL
NM_018327	SPTLC3		NM_004089	TSC22D3		NM_018327	SPTLC3
NM_000610	CD44		NM_014624	S100A6		NM_000610	CD44
NM_001001389	CD44		NM_001160124	KLF6		NM_001001389	CD44
NM_001001390	CD44		NM_001160125	KLF6		NM_001001390	CD44
NM_001001391	CD44		NM_001300	KLF6		NM_001001391	CD44
NM_001001392	CD44		NM_004358	CDC25B		NM_001001392	CD44
NM_005841	SPRY1		NM_021872	CDC25B		NM_005841	SPRY1
NM_003881	WISP2		NM_021873	CDC25B		NM_003881	WISP2
NM_006435	IFITM2		NM_002639	SERPINB5		NM_006435	IFITM2
NM_001173463	KIF21A		NM_001165899	PDE4D		NM_001173463	KIF21A
NM_001173464	KIF21A		NM_001037954	DIXDC1		NM_001173464	KIF21A
NM_001173465	KIF21A		NM_002957	RXRA		NM_001173465	KIF21A
NM_017641	KIF21A		NM_001193582	NRCAM		NM_017641	KIF21A
NM_001145145	SLC1A5		NM_001193583	NRCAM		NM_001145145	SLC1A5
NM_001177355	MSLN		NM_001193584	NRCAM		NM_001177355	MSLN
NM_005823	MSLN		NM_005010	NRCAM		NM_005823	MSLN
NM_001145098	SKIL		NM_003670	BHLHE40		NM_001145098	SKIL
NM_005414	SKIL		NM_016531	KLF3		NM_005414	SKIL
NM_182744	NBL1		NM_001113491	2021-09-09		NM_182744	NBL1
NM_021009	UBC		NM_002253	KDR		NM_021009	UBC
NM_001161452	CYB561A3		NM_020464	NHSL1		NM_001161452	CYB561A3
NM_007053	CD160		NM_001001890	RUNX1		NM_007053	CD160
NM_001198	PRDM1		NM_198925	SEMA4B		NM_001198	PRDM1
NM_001142476	NREP		NM_001017995	SH3PXD2B		NM_001142476	NREP
NM_001136205	KCTD1		NM_152435	AMDHD1		NM_001136205	KCTD1
NM_014374	REPIN1		NM_144665	SESN3		NM_014374	REPIN1
NM_015535	SPATS2L		NM_000700	ANXA1		NM_015535	SPATS2L
NM_001135999	RUSC2		NM_021258	IL22RA1		NM_001135999	RUSC2
NM_001042423	SLC16A3		NM_052866	ADAMTSL1		NM_001042423	SLC16A3
NM_145901	HMGA1		NM_018013	SOBP		NM_145901	HMGA1
NM_145902	HMGA1		NM_001167827	TFEB		NM_145902	HMGA1
NM_001166055	EDNRA		NM_017705	PAQR5		NM_001166055	EDNRA
NM_001957	EDNRA		NM_001098211	HRH1		NM_001957	EDNRA
NM_007203	PALM2-AKAP2		NM_032427	MAML2		NM_007203	PALM2-AKAP2
NM_147150	PALM2-AKAP2		NM_019854	PRMT8		NM_147150	PALM2-AKAP2
NM_053016	PALM2		NM_018296	LRRC36		NM_053016	PALM2
NM_001142614	EHBP1		NM_004442	EPHB2		NM_001142614	EHBP1
NM_021628	ALOXE3		NM_017449	EPHB2		NM_021628	ALOXE3
NM_001143945	GAS6		NM_003028	SHB		NM_001143945	GAS6
NM_000104	CYP1B1		NM_001039492	FHL2		NM_000104	CYP1B1
NM_021255	PELI2		NM_001135861	PHPT1		NM_021255	PELI2
NM_001141945	ACTA2		NM_014172	PHPT1		NM_001141945	ACTA2
NM_001001890	RUNX1		NM_003114	SPAG1		NM_001001890	RUNX1
NM_001122607	RUNX1		NM_001143835	NFRKB		NM_001122607	RUNX1
NM_000584	CXCL8		NM_005620	S100A11		NM_000584	CXCL8
NM_001161841	SULF2		NM_025135	FHOD3		NM_001161841	SULF2
NM_198596	SULF2		NM_033425	DIXDC1		NM_198596	SULF2
NM_015995	KLF13		NM_006868	RAB31		NM_015995	KLF13
NM_007289	MME		NM_001079874	VAV3		NM_007289	MME
NM_001127223	CD59		NM_015549	PLEKHG3		NM_001127223	CD59
NM_001127225	CD59		NM_001032282	KLF10		NM_001127225	CD59
NM_001127226	CD59		NM_199327	SPRY1		NM_001127226	CD59
NM_001165	BIRC3		NM_078467	CDKN1A		NM_001165	BIRC3
NM_182962	BIRC3		NM_001167931	IL1RAP		NM_182962	BIRC3
NM_002131	HMGA1		NM_052943	FAM46B		NM_002131	HMGA1
NM_145899	HMGA1		NM_005531	IFI16		NM_145899	HMGA1
NM_145903	HMGA1		NM_001850	COL8A1		NM_145903	HMGA1
NM_032572	RNASE7		NM_020351	COL8A1		NM_032572	RNASE7
NM_004944	DNASE1L3		NM_000758	CSF2		NM_004944	DNASE1L3
NM_018643	TREM1		NM_002318	LOXL2		NM_018643	TREM1
NM_014722	RIPOR2		NM_000389	CDKN1A		NM_014722	RIPOR2
NM_012098	ANGPTL2		NM_001010972	ZYX		NM_012098	ANGPTL2
NM_013261	PPARGC1A		NM_003461	ZYX		NM_013261	PPARGC1A
NM_005268	GJB5		NM_001004065	AKAP2		NM_005268	GJB5
NM_000930	PLAT		NM_003486	SLC7A5		NM_000930	PLAT
NM_033011	PLAT		NM_002780	PSG4		NM_033011	PLAT
NM_005620	S100A11		NM_213633	PSG4		NM_005620	S100A11
NM_022462	HIF3A		NM_001001521	UGP2		NM_022462	HIF3A
NM_001035534	FAM129B		NM_001167930	IL1RAP		NM_001035534	FAM129B
NM_182728	SLC7A8		NM_134470	IL1RAP		NM_182728	SLC7A8
NM_001128220	VGLL4		NM_170662	CBLB		NM_001128220	VGLL4
NM_001127183	CFLAR		NM_001730	KLF5		NM_001127183	CFLAR
NM_033199	UCN2		NM_001323	CST6		NM_033199	UCN2
NM_003670	BHLHE40		NM_004099	STOM		NM_003670	BHLHE40
NM_005557	KRT16		NM_198194	STOM		NM_005557	KRT16
NM_001042669	ARHGAP24		NM_003873	NRP1		NM_001042669	ARHGAP24
NM_003364	UPP1		NM_194278	ELMSAN1		NM_003364	UPP1
NM_001024847	TGFBR2		NM_001105250	NRXN3		NM_001024847	TGFBR2
NM_003242	TGFBR2		NM_138970	NRXN3		NM_003242	TGFBR2
NM_138461	TM4SF19		NM_000944	PPP3CA		NM_138461	TM4SF19
NM_172390	NFATC1		NM_001130691	PPP3CA		NM_172390	NFATC1
NM_006162	NFATC1		NM_001130692	PPP3CA		NM_006162	NFATC1
NM_172388	NFATC1		NM_001167928	IL1RAP		NM_172388	NFATC1
NM_001080855	PXN		NM_001167929	IL1RAP		NM_001080855	PXN
NM_002859	PXN		NM_002182	IL1RAP		NM_002859	PXN
NM_003739	AKR1C3		NM_001083924	C1orf116		NM_003739	AKR1C3
NM_145263	SPATA18		NM_023938	C1orf116		NM_145263	SPATA18
NM_012242	DKK1		NM_007288	MME		NM_012242	DKK1
NM_002155	HSPA6		NM_030952	NUAK2		NM_002155	HSPA6
NM_001145964	SLC12A4		NM_203463	CERS6		NM_001145964	SLC12A4
NM_005213	CSTA		NM_024599	RHBDF2		NM_005213	CSTA
NM_001042481	FRMD6		NM_033290	MID1		NM_001042481	FRMD6
NM_001699	AXL		NM_001168319	EDN1		NM_001699	AXL
NM_021913	AXL		NM_001955	EDN1		NM_021913	AXL
NM_000889	ITGB7		NM_001731	BTG1		NM_000889	ITGB7
NM_013231	FLRT2		NM_020824	ARHGAP21		NM_013231	FLRT2
NM_001024215	FBLIM1		NM_001136528	SERPINE2		NM_001024215	FBLIM1
NM_001002857	ANXA2		NM_006216	SERPINE2		NM_001002857	ANXA2
NM_001002858	ANXA2		NM_199181	SOGA1		NM_001002858	ANXA2
NM_001136015	ANXA2		NM_001013415	FBXW7		NM_001136015	ANXA2
NM_004039	ANXA2		NM_000899	KITLG		NM_004039	ANXA2
NM_002192	INHBA		NM_003994	KITLG		NM_002192	INHBA
NM_001083914	CTBP2		NM_001677	ATP1B1		NM_001083914	CTBP2
NM_030572	SPX		NM_006486	FBLN1		NM_030572	SPX
NM_004926	ZFP36L1		NM_004337	OSGIN2		NM_004926	ZFP36L1
NM_006164	NFE2L2		NM_020300	MGST1		NM_006164	NFE2L2
NM_021242	MID1IP1		NM_006822	RAB40B		NM_021242	MID1IP1
NM_001145031	PLAU		NM_012121	CDC42EP4		NM_001145031	PLAU
NM_002658	PLAU		NM_000382	ALDH3A2		NM_002658	PLAU
NM_012130	CLDN14		NM_001031806	ALDH3A2		NM_012130	CLDN14
NM_170695	TGIF1		NM_001164281	TRAF3IP2		NM_170695	TGIF1
NM_173210	TGIF1		NM_147686	TRAF3IP2		NM_173210	TGIF1
NM_001218	CA12		NM_001166051	APBB2		NM_001218	CA12
NM_206925	CA12		NM_001166052	APBB2		NM_206925	CA12
NM_058238	WNT7B		NM_023940	RASL11B		NM_058238	WNT7B
NM_001099287	NIPAL4		NM_145260	OSR1		NM_001099287	NIPAL4
NM_001172292	NIPAL4		NM_032876	AJUBA		NM_001172292	NIPAL4
NM_002851	PTPRZ1		NM_001166053	APBB2		NM_002851	PTPRZ1
NM_182775	ALS2CL		NM_001166054	APBB2		NM_182775	ALS2CL
NM_033390	ZC3H12C		NM_014059	RGCC		NM_033390	ZC3H12C
NM_014096	SLC43A3		NM_006033	LIPG		NM_014096	SLC43A3
NM_001161331	SSH1		NM_024576	OGFRL1		NM_001161331	SSH1
NM_006526	ZNF217		NM_001627	ALCAM		NM_006526	ZNF217
NM_001102367	DGLUCY		NM_001113239	HIPK2		NM_001102367	DGLUCY
NM_001142857	EFCAB1		NM_022740	HIPK2		NM_001142857	EFCAB1
NM_024593	EFCAB1		NM_001161330	SSH1		NM_024593	EFCAB1
NM_001128210	SPRED2		NM_006015	ARID1A		NM_001128210	SPRED2
NM_003831	RIOK3		NM_139135	ARID1A		NM_003831	RIOK3
NM_001172896	CAV1		NM_003739	AKR1C3		NM_001172896	CAV1
NM_001142602	SPHK1		NM_001098790	MID1IP1		NM_001142602	SPHK1
NM_017490	MARK2		NM_001098791	MID1IP1		NM_017490	MARK2
NM_001018008	TPM1		NM_001130966	TBXAS1		NM_001018008	TPM1
NM_033131	WNT3A		NM_001166254	TBXAS1		NM_033131	WNT3A
NM_152743	BRAT1		NM_022153	VSIR		NM_152743	BRAT1
NM_000422	KRT17		NM_001122824	TACC1		NM_000422	KRT17
NM_207380	CCDC9B		NM_006283	TACC1		NM_207380	CCDC9B
NM_002526	NT5E		NM_001039348	EFEMP1		NM_002526	NT5E
NM_016546	C1RL		NM_001039349	EFEMP1		NM_016546	C1RL
NM_152550	SH3RF2		NM_000346	SOX9		NM_152550	SH3RF2
NM_001003794	MGLL		NM_001122607	RUNX1		NM_001003794	MGLL
NM_002430	MN1		NM_022733	SMAP2		NM_002430	MN1
NM_018357	LARP6		NM_001134438	PHLDB2		NM_018357	LARP6
NM_197958	LARP6		NM_145753	PHLDB2		NM_197958	LARP6
NM_001145963	SLC12A4		NM_173557	RNF152		NM_001145963	SLC12A4
NM_014675	CROCC		NM_153212	GJB4		NM_014675	CROCC
NM_201379	PLEC		NM_002835	PTPN12		NM_201379	PLEC
NM_007288	MME		NM_018186	C1orf112		NM_007288	MME
NM_003483	HMGA2		NM_006379	SEMA3C		NM_003483	HMGA2
NM_003484	HMGA2		NM_001031711	ERGIC1		NM_003484	HMGA2
NM_012105	BACE2		NM_005252	FOS		NM_012105	BACE2
NM_138991	BACE2		NM_018984	SSH1		NM_138991	BACE2
NM_138992	BACE2		NM_001465	FYB1		NM_138992	BACE2
NM_001040664	PPAN-P2RY11		NM_199335	FYB1		NM_001040664	PPAN-P2RY11
NM_001012715			NM_152330	FRMD6		NM_001012715
NM_003463	PTP4A1		NM_006734	HIVEP2		NM_003463	PTP4A1
NM_001172897	CAV1		NM_001077498	FAM222B		NM_001172897	CAV1
NM_001001522	TAGLN		NM_018182	FAM222B		NM_001001522	TAGLN
NM_003186	TAGLN		NM_015288	JADE2		NM_003186	TAGLN
NM_016002	SCCPDH		NM_003406	YWHAZ		NM_016002	SCCPDH
NM_001190943	TNFSF10		NM_001956	EDN2		NM_001190943	TNFSF10
NM_001190942	TNFSF10		NM_001259	CDK6		NM_001190942	TNFSF10
NM_003810	TNFSF10		NM_000376	VDR		NM_003810	TNFSF10
NM_000165	GJA1		NM_001017535	VDR		NM_000165	GJA1
NM_001144915	FGFR2		NM_016206	VGLL3		NM_001144915	FGFR2
NM_003492	TMEM187		NM_133459	CCBE1		NM_003492	TMEM187
NM_175884	CCDC71L		NM_003681	PDXK		NM_175884	CCDC71L
NM_001465	FYB1		NM_001570	IRAK2		NM_001465	FYB1
NM_199335	FYB1		NM_004207	SLC16A3		NM_199335	FYB1
NM_003220	TFAP2A		NM_001134875	TEDC1		NM_003220	TFAP2A
NM_002395	ME1		NM_001134876	TEDC1		NM_002395	ME1
NM_001031685	TP53BP2		NM_001160004	NRG1		NM_001031685	TP53BP2
NM_005426	TP53BP2		NM_013956	NRG1		NM_005426	TP53BP2
NM_000215	JAK3		NM_013957	NRG1		NM_000215	JAK3
NM_020433	JPH2		NM_013960	NRG1		NM_020433	JPH2
NM_175913	JPH2		NM_013964	NRG1		NM_175913	JPH2
NM_007207	DUSP10		NM_001343	DAB2		NM_007207	DUSP10
NM_144729	DUSP10		NM_033397	ITPRIP		NM_144729	DUSP10
NM_001850	COL8A1		NM_024680	E2F8		NM_001850	COL8A1
NM_020351	COL8A1		NM_014214	IMPA2		NM_020351	COL8A1
NM_153692	HTRA4		NM_002010	FGF9		NM_153692	HTRA4
NM_001008410	STEAP3		NM_152573	RASEF		NM_001008410	STEAP3
NM_018234	STEAP3		NM_001160005	NRG1		NM_018234	STEAP3
NM_182915	STEAP3		NM_013958	NRG1		NM_182915	STEAP3
NM_005502	ABCA1		NM_001160008	NRG1		NM_005502	ABCA1
NM_001130048	DOCK9		NM_001353	AKR1C1		NM_001130048	DOCK9
NM_001130050	DOCK9		NM_006485	FBLN1		NM_001130050	DOCK9
NM_001145460	HOPX		NM_080872	UNC5D		NM_001145460	HOPX
NM_032495	HOPX		NM_001039130	ALOX15B		NM_032495	HOPX
NM_139212	HOPX		NM_001039131	ALOX15B		NM_139212	HOPX
NM_006851	GLIPR1		NM_001141	ALOX15B		NM_006851	GLIPR1
NM_015714	G0S2		NM_001085400	RELL1		NM_015714	G0S2
NM_021224	ZNF462		NM_152740	HIBADH		NM_021224	ZNF462
NM_001142730	KCTD1		NM_001160002	NRG1		NM_001142730	KCTD1
NM_130435	PTPRE		NM_001160007	NRG1		NM_130435	PTPRE
NM_001178096	F3		NM_004495	NRG1		NM_001178096	F3
NM_001993	F3		NM_001102426	TBC1D8		NM_001993	F3
NM_001017402	LAMB3		NM_001130158	MYO1B		NM_001017402	LAMB3
NM_000714	TSPO		NM_012223	MYO1B		NM_000714	TSPO
NM_007311	TSPO		NM_001145353	ELF1		NM_007311	TSPO
NM_001394	DUSP4		NM_001098213	HRH1		NM_001394	DUSP4
NM_004928	C21orf2		NM_001191	BCL2L1		NM_004928	C21orf2
NM_012464	TLL1		NM_138578	BCL2L1		NM_012464	TLL1
NM_006290	TNFAIP3		NM_001195001	PTPRU		NM_006290	TNFAIP3
NM_203411	TMEM88		NM_005704	PTPRU		NM_203411	TMEM88
NM_001032280	TFAP2A		NM_133177	PTPRU		NM_001032280	TFAP2A
NM_001024628	NRP1		NM_133178	PTPRU		NM_001024628	NRP1
NM_001024629	NRP1		NM_022337	RAB38		NM_001024629	NRP1
NM_003873	NRP1		NM_005952	MT1X		NM_003873	NRP1
NM_001174160	SH2D4A		NM_006152	LRMP		NM_001174160	SH2D4A
NM_022071	SH2D4A		NM_001172897	CAV1		NM_022071	SH2D4A
NM_004595	SMS		NM_001113349	ECE1		NM_004595	SMS
NM_004079	CTSS		NM_001085399	RELL1		NM_004079	CTSS
NM_000598	IGFBP3		NM_030938	VMP1		NM_000598	IGFBP3
NM_001013398	IGFBP3		NM_021732	AVPI1		NM_001013398	IGFBP3
NM_001145290	SLC37A2		NM_015964	TPPP3		NM_001145290	SLC37A2
NM_198277	SLC37A2		NM_016140	TPPP3		NM_198277	SLC37A2
NM_001171948	KXD1		NM_017633	FAM46A		NM_001171948	KXD1
NM_001171949	KXD1		NM_182907	PRDM1		NM_001171949	KXD1
NM_024069	KXD1		NM_001996	FBLN1		NM_024069	KXD1
NM_019058	DDIT4		NM_012101	TRIM29		NM_019058	DDIT4
NM_004348	RUNX2		NM_015675	GADD45B		NM_004348	RUNX2
NM_004417	DUSP1		NM_178181	CDCP1		NM_004417	DUSP1
NM_182907	PRDM1		NM_001186	BACH1		NM_182907	PRDM1
NM_004864	GDF15		NM_198316	TNS2		NM_004864	GDF15
NM_005737	ARL4C		NM_002069	GNAI1		NM_005737	ARL4C
NM_001039762	FAM196A		NM_001995	ACSL1		NM_001039762	FAM196A
NM_000475	NR0B1		NM_000698	ALOX5		NM_000475	NR0B1
NM_006829	ADIRF		NM_002149	HPCAL1		NM_006829	ADIRF
NM_001008844	DSP		NM_006487	FBLN1		NM_001008844	DSP
NM_004415	DSP		NM_007289	MME		NM_004415	DSP
NM_153377	LRIG3		NM_005902	SMAD3		NM_153377	LRIG3
NM_016201	AMOTL2		NM_175839	SMOX		NM_016201	AMOTL2
NM_145040	CAVIN3		NM_175840	SMOX		NM_145040	CAVIN3
NM_133459	CCBE1		NM_175841	SMOX		NM_133459	CCBE1
NM_000641	IL11		NM_175842	SMOX		NM_000641	IL11
NM_006820	IFI44L		NM_178865	SERINC2		NM_006820	IFI44L
NM_005992	TBX1		NM_177524	MEST		NM_005992	TBX1
NM_080646	TBX1		NM_017617	NOTCH1		NM_080646	TBX1
NM_080647	TBX1		NM_003034	ST8SIA1		NM_080647	TBX1
NM_000777	CYP3A5		NM_021724	NR1D1		NM_000777	CYP3A5
NM_001190484	CYP3A5		NM_144652	LETM2		NM_001190484	CYP3A5
NM_003068	SNAI2		NM_006317	BASP1		NM_003068	SNAI2
NM_001145001	NEK6		NM_001447	FAT2		NM_001145001	NEK6
NM_014397	NEK6		NM_003765	STX10		NM_014397	NEK6
NM_024336	IRX3		NM_007008	RTN4		NM_024336	IRX3
NM_001962	EFNA5		NM_031484	MARVELD1		NM_001962	EFNA5
NM_030968	C1QTNF1		NM_001455	FOXO3		NM_030968	C1QTNF1
NM_198594	C1QTNF1		NM_002448	MSX1		NM_198594	C1QTNF1
NM_001120	MFSD10		NM_025106	SPSB1		NM_001120	MFSD10
NM_003033	ST3GAL1		NM_001033081	MYCL		NM_003033	ST3GAL1
NM_173344	ST3GAL1		NM_001033082	MYCL		NM_173344	ST3GAL1
NM_001039492	FHL2		NM_006343	MERTK		NM_001039492	FHL2
NM_001100876	PHYHD1		NM_001145001	NEK6		NM_001100876	PHYHD1
NM_174933	PHYHD1		NM_014397	NEK6		NM_174933	PHYHD1
NM_001024216	FBLIM1		NM_015550	OSBPL3		NM_001024216	FBLIM1
NM_018933	PCDHB13		NM_145320	OSBPL3		NM_018933	PCDHB13
NM_001014444	CRYM		NM_145321	OSBPL3		NM_001014444	CRYM
NM_001888	CRYM		NM_145322	OSBPL3		NM_001888	CRYM
NM_001142350	THOC6		NM_001190484	CYP3A5		NM_001142350	THOC6
NM_024339	THOC6		NM_006829	ADIRF		NM_024339	THOC6
NM_178170	NEK8		NM_015516	TSKU		NM_178170	NEK8
NM_005194	CEBPB		NM_003749	IRS2		NM_005194	CEBPB
NM_004431	EPHA2		NM_000024	ADRB2		NM_004431	EPHA2
NM_001190796	NCK1		NM_019035	PCDH18		NM_001190796	NCK1
NM_201283	EGFR		NM_024702	ZNF750		NM_201283	EGFR
NM_201284	EGFR		NM_033027	CSRNP1		NM_201284	EGFR
NM_201282	EGFR		NM_001144966	NEDD4L		NM_201282	EGFR
NM_005228	EGFR		NM_001039763	TMEM232		NM_005228	EGFR
NM_003330	TXNRD1		NM_001168236	ABL2		NM_003330	TXNRD1
NM_182729	TXNRD1		NM_001168237	ABL2		NM_182729	TXNRD1
NM_182742	TXNRD1		NM_001168238	ABL2		NM_182742	TXNRD1
NM_182743	TXNRD1		NM_007314	ABL2		NM_182743	TXNRD1
NM_000700	ANXA1		NM_001164283	TRAF3IP2		NM_000700	ANXA1
NM_020041	SLC2A9		NM_022842	CDCP1		NM_020041	SLC2A9
NM_002780	PSG4		NM_016315	GULP1		NM_002780	PSG4
NM_213633	PSG4		NM_001193380	IL17RE		NM_213633	PSG4
NM_016531	KLF3		NM_153480	IL17RE		NM_016531	KLF3
NM_004772	NREP		NM_002775	HTRA1		NM_004772	NREP
NM_001113491	2021-09-09		NM_004924	ACTN4		NM_001113491	2021-09-09
NM_006058	TNIP1		NM_018988	GFOD1		NM_006058	TNIP1
NM_001012642	GRAMD2A		NM_018986	SH3TC1		NM_001012642	GRAMD2A
NM_015368	PANX1		NM_001172896	CAV1		NM_015368	PANX1
NM_013451	MYOF		NM_016281	TAOK3		NM_013451	MYOF
NM_133337	MYOF		NM_001177591	PPP2R2A		NM_133337	MYOF
NM_000416	IFNGR1		NM_005502	ABCA1		NM_000416	IFNGR1
NM_203403	LURAP1L		NM_001146109	PTGR1		NM_203403	LURAP1L
NM_001944	DSG3		NM_013451	MYOF		NM_001944	DSG3
NM_002260	KLRC2		NM_133337	MYOF		NM_002260	KLRC2
NM_006720	ABLIM1		NM_145175	FAM84A		NM_006720	ABLIM1
NM_001785	CDA		NM_002607	PDGFA		NM_001785	CDA
NM_001029882	AHDC1		NM_033023	PDGFA		NM_001029882	AHDC1
NM_144653	NACC2		NM_000548	TSC2		NM_144653	NACC2
NM_001024683	ZNF688		NM_001077183	TSC2		NM_001024683	ZNF688
NM_145271	ZNF688		NM_001114382	TSC2		NM_145271	ZNF688
NM_001039130	ALOX15B		NM_006266	RALGDS		NM_001039130	ALOX15B
NM_001039131	ALOX15B		NM_001136216	TMEM51		NM_001039131	ALOX15B
NM_001141	ALOX15B		NM_001136217	TMEM51		NM_001141	ALOX15B
NM_016315	GULP1		NM_001080512	BICC1		NM_016315	GULP1
NM_007040	HNRNPUL1		NM_004205	USP2		NM_007040	HNRNPUL1
NM_002897	RBMS1		NM_012244	SLC7A8		NM_002897	RBMS1
NM_016836	RBMS1		NM_005795	CALCRL		NM_016836	RBMS1
NM_001032282	KLF10		NM_004696	SLC16A4		NM_001032282	KLF10
NM_080284	ABCA6		NM_001130455	DYSF		NM_080284	ABCA6
NM_080388	S100A16		NM_001130982	DYSF		NM_080388	S100A16
NM_001012761	RGMB		NM_001130983	DYSF		NM_001012761	RGMB
NM_001018076	NR3C1		NM_001130984	DYSF		NM_001018076	NR3C1
NM_178232	HAPLN3		NM_001130985	DYSF		NM_178232	HAPLN3
NM_001002264	EPSTI1		NM_001130986	DYSF		NM_001002264	EPSTI1
NM_033255	EPSTI1		NM_001130987	DYSF		NM_033255	EPSTI1
NM_006137	CD7		NM_003364	UPP1		NM_006137	CD7
NM_025214	CCDC68		NM_000495	COL4A5		NM_025214	CCDC68
NM_144726	RNF145		NM_033380	COL4A5		NM_144726	RNF145
NM_001136204	RCC2		NM_013296	GPSM2		NM_001136204	RCC2
NM_181864	ACOT7		NM_020747	ZNF608		NM_181864	ACOT7
NM_001013717	C5orf56		NM_031445	AMMECR1L		NM_001013717	C5orf56
NM_021226	ARHGAP22		NM_019073	SPATA6		NM_021226	ARHGAP22
NM_001145033	C11orf96		NM_004625	WNT7A		NM_001145033	C11orf96
NM_033274	ADAM19		NM_024940	DOCK5		NM_033274	ADAM19
NM_001127245	LRRC8A		NM_153688	ZFP1		NM_001127245	LRRC8A
NM_019594	LRRC8A		NM_021105	PLSCR1		NM_019594	LRRC8A
NM_152787	TAB3		NM_181809	BMP8A		NM_152787	TAB3
NM_001100164	PHACTR2		NM_001185119	MYNN		NM_001100164	PHACTR2
NM_001100165	PHACTR2		NM_002224	ITPR3		NM_001100165	PHACTR2
NM_001171868	TMEM200B		NM_001144758	PHLDB1		NM_001171868	TMEM200B
NM_138575	PGAM5		NM_001144759	PHLDB1		NM_138575	PGAM5
NM_001170543	PGAM5		NM_004295	TRAF4		NM_001170543	PGAM5
NM_001170544	PGAM5		NM_015881	DKK3		NM_001170544	PGAM5
NM_001193283	LEKR1		NM_182573	LYPD5		NM_001193283	LEKR1
NM_012396	PHLDA3		NM_005230	ELK3		NM_012396	PHLDA3
NM_175617	MT1E		NM_012334	MYO10		NM_175617	MT1E
NM_024769	CLMP		NM_001039672	YIF1B		NM_024769	CLMP
NM_004862	LITAF		NM_001039673	YIF1B		NM_004862	LITAF
NM_018912	PCDHGA1		NM_001145463	YIF1B		NM_018912	PCDHGA1
NM_031993	PCDHGA1		NM_001137550	LRRFIP1		NM_031993	PCDHGA1
NM_001017415	USP1		NM_004348	RUNX2		NM_001017415	USP1
NM_001017416	USP1		NM_001123225	SYCE3		NM_001017416	USP1
NM_206866	BACH1		NM_018640	LMO3		NM_206866	BACH1
NM_001006616	TSPAN17		NM_004926	ZFP36L1		NM_001006616	TSPAN17
NM_012171	TSPAN17		NM_001178102	LOX		NM_012171	TSPAN17
NM_130465	TSPAN17		NM_001146108	PTGR1		NM_130465	TSPAN17
NM_001129727	PLEKHG4		NM_133443	GPT2		NM_001129727	PLEKHG4
NM_005384	NFIL3		NM_001001669	ARHGEF37		NM_005384	NFIL3
NM_005239	ETS2		NM_174902	LDLRAD3		NM_005239	ETS2
NM_001193308	SYTL1		NM_147195	ANKRD18A		NM_001193308	SYTL1
NM_032872	SYTL1		NM_198578	LRRK2		NM_032872	SYTL1
NM_145004	ADAM32		NM_001005271	CHD3		NM_145004	ADAM32
NM_015516	TSKU		NM_148886	MIEF2		NM_015516	TSKU
NM_020631	PLEKHG5		NM_001170939	ISYNA1		NM_020631	PLEKHG5
NM_002089	CXCL2		NM_001093771	TXNRD1		NM_002089	CXCL2
NM_006474	PDPN		NM_005376	MYCL		NM_006474	PDPN
NM_198389	PDPN		NM_001144886	CITED1		NM_198389	PDPN
NM_001032281	TFPI		NM_006045	ATP9A		NM_001032281	TFPI
NM_006287	TFPI		NM_019032	ADAMTSL4		NM_006287	TFPI
NM_001162893	KIAA0040		NM_012152	LPAR3		NM_001162893	KIAA0040
NM_001162894	KIAA0040		NM_001039803	CDK20		NM_001162894	KIAA0040
NM_006255	PRKCH		NM_001170639	CDK20		NM_006255	PRKCH
NM_022359	PDE4DIP		NM_001170640	CDK20		NM_022359	PDE4DIP
NM_004657	CAVIN2		NM_012119	CDK20		NM_004657	CAVIN2
NM_014265	ADAM28		NM_178432	CDK20		NM_014265	ADAM28
NM_021777	ADAM28		NM_001190822	SMAD7		NM_021777	ADAM28
NM_001048251	CMTM3		NM_018643	TREM1		NM_001048251	CMTM3
NM_144601	CMTM3		NM_001170756	FAM122B		NM_144601	CMTM3
NM_181554	CMTM3		NM_145284	FAM122B		NM_181554	CMTM3
NM_001178040	STX3		NM_203403	LURAP1L		NM_001178040	STX3
NM_004177	STX3		NM_018676	THSD1		NM_004177	STX3
NM_007274	ACOT7		NM_199263	THSD1		NM_007274	ACOT7
NM_058197	CDKN2A		NM_001145425	NR1D2		NM_058197	CDKN2A
NM_002157	HSPE1		NM_198458	ZNF497		NM_002157	HSPE1
NM_002359	MAFG		NM_001946	DUSP6		NM_002359	MAFG
NM_175854	PAN3		NM_022652	DUSP6		NM_175854	PAN3
NM_001501	GNRH2		NM_198837	ACACA		NM_001501	GNRH2
NM_178331	GNRH2		NM_198838	ACACA		NM_178331	GNRH2
NM_178332	GNRH2		NM_001797	CDH11		NM_178332	GNRH2
NM_001901	CTGF		NM_152550	SH3RF2		NM_001901	CTGF
NM_058229	FBXO32		NM_005779	LHFPL2		NM_058229	FBXO32
NM_003107	SOX4		NM_020992	PDLIM1		NM_003107	SOX4
NM_007183	PKP3		NM_178452	DNAAF1		NM_007183	PKP3
NM_004368	CNN2		NM_001135004	DNAJB5		NM_004368	CNN2
NM_201277	CNN2		NM_012266	DNAJB5		NM_201277	CNN2
NM_001004316	LEKR1		NM_001145426	YBX3		NM_001004316	LEKR1
NM_002214	ITGB8		NM_003651	YBX3		NM_002214	ITGB8
NM_000428	LTBP2		NM_145172	WDR63		NM_000428	LTBP2
NM_001135702	YWHAZ		NM_005384	NFIL3		NM_001135702	YWHAZ
NM_173557	RNF152		NM_001114173	CTSC		NM_173557	RNF152
NM_000366	TPM1		NM_148170	CTSC		NM_000366	TPM1
NM_001018005	TPM1		NM_003907	EIF2B5		NM_001018005	TPM1
NM_001018004	TPM1		NM_001136127	DNM3		NM_001018004	TPM1
NM_001018006	TPM1		NM_015569	DNM3		NM_001018006	TPM1
NM_001018007	TPM1		NM_022648	TNS1		NM_001018007	TPM1
NM_001018020	TPM1		NM_001039771	CBLN3		NM_001018020	TPM1
NM_001080470	ZNF697		NM_001174087	NCOA3		NM_001080470	ZNF697
NM_145010	ENKUR		NM_001174088	NCOA3		NM_145010	ENKUR
NM_198177	MITF		NM_006534	NCOA3		NM_198177	MITF
NM_002668	PLP2		NM_181659	NCOA3		NM_002668	PLP2
NM_016152	RARB		NM_015158	KANK1		NM_016152	RARB
NM_004109	FDX1		NM_021242	MID1IP1		NM_004109	FDX1
NM_000295	SERPINA1		NM_007031	HSF2BP		NM_000295	SERPINA1
NM_001101376	FAM183A		NM_004265	FADS2		NM_001101376	FAM183A
NM_032876	AJUBA		NM_004100	EYA4		NM_032876	AJUBA
NM_001193416	DDX3X		NM_172103	EYA4		NM_001193416	DDX3X
NM_001193417	DDX3X		NM_172105	EYA4		NM_001193417	DDX3X
NM_001356	DDX3X		NM_198966	PTHLH		NM_001356	DDX3X
NM_005554	KRT6A		NM_017629	AGO4		NM_005554	KRT6A
NM_003564	TAGLN2		NM_014350	TNFAIP8		NM_003564	TAGLN2
NM_003064	SLPI		NM_001080976	DSE		NM_003064	SLPI
NM_001135599	TGFB2		NM_014505	KCNMB4		NM_001135599	TGFB2
NM_003238	TGFB2		NM_003658	BARX2		NM_003238	TGFB2
NM_001196	BID		NM_007021	DEPP1		NM_001196	BID
NM_197967	BID		NM_001621	AHR		NM_197967	BID
NM_001195045	YAP1		NM_001174126	SLC11A2		NM_001195045	YAP1
NM_002356	MARCKS		NM_001174127	SLC11A2		NM_002356	MARCKS
NM_020230	PPAN		NM_025008	ADAMTSL4		NM_020230	PPAN
NM_033104	STON2		NM_000366	TPM1		NM_033104	STON2
NM_001161573	MAFF		NM_001018005	TPM1		NM_001161573	MAFF
NM_080732	EGLN2		NM_153838	ADGRF4		NM_080732	EGLN2
NM_004360	CDH1		NM_001160301	DPYD		NM_004360	CDH1
NM_001195683	TGFBR3		NM_198390	CMIP		NM_001195683	TGFBR3
NM_003243	TGFBR3		NM_001136001	ABL2		NM_003243	TGFBR3
NM_002607	PDGFA		NM_004427	PHC2		NM_002607	PDGFA
NM_033023	PDGFA		NM_001128827	DLG4		NM_033023	PDGFA
NM_001142601	SPHK1		NM_138451	IQCD		NM_001142601	SPHK1
NM_021972	SPHK1		NM_014899	RHOBTB3		NM_021972	SPHK1
NM_182965	SPHK1		NM_024496	IRF2BPL		NM_182965	SPHK1
NM_182981	OSGIN1		NM_001098637	PWWP2B		NM_182981	OSGIN1
NM_001252	CD70		NM_138499	PWWP2B		NM_001252	CD70
NM_001177712	RBMS3		NM_001031701	NT5DC3		NM_001177712	RBMS3
NM_014483	RBMS3		NM_021922	FANCE		NM_014483	RBMS3
NM_001003792	RBMS3		NM_002632	PGF		NM_001003792	RBMS3
NM_001003793	RBMS3		NM_002747	MAPK4		NM_001003793	RBMS3
NM_001177711	RBMS3		NM_206833	CTXN1		NM_001177711	RBMS3
NM_152243	CDC42EP1		NM_006147	IRF6		NM_152243	CDC42EP1
NM_006350	FST		NM_173595	ANKRD52		NM_006350	FST
NM_013409	FST		NM_025079	ZC3H12A		NM_013409	FST
NM_001511	CXCL1		NM_031923	TAF3		NM_001511	CXCL1
NM_018561	USP49		NM_000635	RFX2		NM_018561	USP49
NM_001114309	ELF3		NM_134433	RFX2		NM_001114309	ELF3
NM_004433	ELF3		NM_003966	SEMA5A		NM_004433	ELF3
NM_144719	CCDC13		NM_001172086	PEX2		NM_144719	CCDC13
NM_032229	SLITRK6		NM_001172087	PEX2		NM_032229	SLITRK6
NM_021005	NR2F2		NM_030806	C1orf21		NM_021005	NR2F2
NM_015432	PLEKHG4		NM_018004	TMEM45A		NM_015432	PLEKHG4
NM_130470	MADD		NM_170695	TGIF1		NM_130470	MADD
NM_153838	ADGRF4		NM_173210	TGIF1		NM_153838	ADGRF4
NM_001123385	BCOR		NM_001160393	TRPT1		NM_001123385	BCOR
NM_017745	BCOR		NM_003395	WNT9A		NM_017745	BCOR
NM_001143824	SLC38A4		NM_001008699	IL4R		NM_001143824	SLC38A4
NM_018018	SLC38A4		NM_004040	RHOB		NM_018018	SLC38A4
NM_001103160	SH2D5		NM_005195	CEBPD		NM_001103160	SH2D5
NM_001103161	SH2D5		NM_004961	GABRE		NM_001103161	SH2D5
NM_001194937	POGZ		NM_002309	LIF		NM_001194937	POGZ
NM_001194938	POGZ		NM_001001555	GRB10		NM_001194938	POGZ
NM_015100	POGZ		NM_004683	RGN		NM_015100	POGZ
NM_145796	POGZ		NM_152869	RGN		NM_145796	POGZ
NM_016639	TNFRSF12A		NM_004438	EPHA4		NM_016639	TNFRSF12A
NM_001878	CRABP2		NM_000617	SLC11A2		NM_001878	CRABP2
NM_001195226	PRODH		NM_001174128	SLC11A2		NM_001195226	PRODH
NM_001118890	GLRX		NM_001039538	MAP2		NM_001118890	GLRX
NM_002064	GLRX		NM_002204	ITGA3		NM_002064	GLRX
NM_000227	LAMA3		NM_005501	ITGA3		NM_000227	LAMA3
NM_001127718	LAMA3		NM_003064	SLPI		NM_001127718	LAMA3
NM_144732	HNRNPUL1		NM_014553	TFCP2L1		NM_144732	HNRNPUL1
NM_000891	KCNJ2		NM_030582	COL18A1		NM_000891	KCNJ2
NM_174908	CCDC50		NM_130444	COL18A1		NM_174908	CCDC50
NM_178335	CCDC50		NM_001001396	ATP2B4		NM_178335	CCDC50
NM_004163	RAB27B		NM_001684	ATP2B4		NM_004163	RAB27B
NM_145791	MGST1		NM_001100420	C21orf91		NM_145791	MGST1
NM_001178093	BCAT1		NM_001100421	C21orf91		NM_001178093	BCAT1
NM_004914	RAB36		NM_017447	C21orf91		NM_004914	RAB36
NM_001042664	PLEKHG5		NM_001033561	PHF12		NM_001042664	PLEKHG5
NM_000965	RARB		NM_001039671	YIF1B		NM_000965	RARB
NM_004624	VIPR1		NM_001145461	YIF1B		NM_004624	VIPR1
NM_032711	MAFG		NM_001145462	YIF1B		NM_032711	MAFG
NM_001145156	NR2F2		NM_003088	FSCN1		NM_001145156	NR2F2
NM_021914	CFL2		NM_001165	BIRC3		NM_021914	CFL2
NM_001200	BMP2		NM_182962	BIRC3		NM_001200	BMP2
NM_001008723	CFAP58		NM_006594	AP4B1		NM_001008723	CFAP58
NM_024761	MOB3B		NM_020889	PHF12		NM_024761	MOB3B
NM_006943	SOX12		NM_014732	KIAA0513		NM_006943	SOX12
NM_144725	TTC23L		NM_001145460	HOPX		NM_144725	TTC23L
NM_000224	KRT18		NM_032495	HOPX		NM_000224	KRT18
NM_001131008	PTPN12		NM_139212	HOPX		NM_001131008	PTPN12
NM_001131009	PTPN12		NM_015130	TBC1D9		NM_001131009	PTPN12
NM_002965	S100A9		NM_005723	TSPAN5		NM_002965	S100A9
NM_000694	ALDH3B1		NM_019082	DDX56		NM_000694	ALDH3B1
NM_001030010	ALDH3B1		NM_177401	MIDN		NM_001030010	ALDH3B1
NM_201380	PLEC		NM_000055	BCHE		NM_201380	PLEC
NM_001078177	SLC29A1		NM_003798	CTNNAL1		NM_001078177	SLC29A1
NM_144717	IL20RB		NM_022802	CTBP2		NM_144717	IL20RB
NM_002639	SERPINB5		NM_012190	ALDH1L1		NM_002639	SERPINB5
NM_001146175	ZNF414		NM_001175	ARHGDIB		NM_001146175	ZNF414
NM_032370	ZNF414		NM_001168355	OSMR		NM_032370	ZNF414
NM_001160234	ATP1A1		NM_001024210	S100A13		NM_001160234	ATP1A1
NM_001145412	NFE2L2		NM_001172658	ZFYVE28		NM_001145412	NFE2L2
NM_001145413	NFE2L2		NM_001024948	FNBP1L		NM_001145413	NFE2L2
NM_001078175	SLC29A1		NM_001164473	FNBP1L		NM_001078175	SLC29A1
NM_001078176	SLC29A1		NM_017737	FNBP1L		NM_001078176	SLC29A1
NM_198578	LRRK2		NM_001098416	HDAC7		NM_198578	LRRK2
NM_033397	ITPRIP		NM_015401	HDAC7		NM_033397	ITPRIP
NM_004126	GNG11		NM_015547	ACOT11		NM_004126	GNG11
NM_005626	SRSF4		NM_001172657	ZFYVE28		NM_005626	SRSF4
NM_003879	CFLAR		NM_001225	CASP4		NM_003879	CFLAR
NM_004273	CHST3		NM_144975	SLFN5		NM_004273	CHST3
NM_001127454	GSDME		NM_001099691	TGFA		NM_001127454	GSDME
NM_004403	GSDME		NM_003236	TGFA		NM_004403	GSDME
NM_001734	C1S		NM_001497	B4GALT1		NM_001734	C1S
NM_201442	C1S		NM_000210	ITGA6		NM_201442	C1S
NM_017883	WDR13		NM_001079818	ITGA6		NM_017883	WDR13
NM_203354	MIA2		NM_194291	TMEM65		NM_203354	MIA2
NM_003955	SOCS3		NM_001992	F2R		NM_003955	SOCS3
NM_001127453	GSDME		NM_012401	PLXNB2		NM_001127453	GSDME
NM_001191014	GSTO2		NM_022462	HIF3A		NM_001191014	GSTO2
NM_001191015	GSTO2		NM_014963	SBNO2		NM_001191015	GSTO2
NM_001159587	CD109		NM_007368	RASA3		NM_001159587	CD109
NM_001159588	CD109		NM_003264	TLR2		NM_001159588	CD109
NM_133493	CD109		NM_019896	POLE4		NM_133493	CD109
NM_003823	TNFRSF6B		NM_005780	LHFPL6		NM_003823	TNFRSF6B
NM_033356	CASP8		NM_001018004	TPM1		NM_033356	CASP8
NM_003567	BCAR3		NM_001018006	TPM1		NM_003567	BCAR3
NM_001190822	SMAD7		NM_001018007	TPM1		NM_001190822	SMAD7
NM_198390	CMIP		NM_001018020	TPM1		NM_198390	CMIP
NM_001113756	TYMP		NM_080671	KCNE4		NM_001113756	TYMP
NM_014181	LGALSL		NM_024798	SNX22		NM_014181	LGALSL
NM_001193571	CSRP1		NM_006186	NR4A2		NM_001193571	CSRP1
NM_004326	BCL9		NM_012419	RGS17		NM_004326	BCL9
NM_207115	ZNF580		NM_004475	FLOT2		NM_207115	ZNF580
NM_001172682	ZNF641		NM_152862	ARPC2		NM_001172682	ZNF641
NM_005168	RND3		NM_017668	NDE1		NM_005168	RND3
NM_032160	DSEL		NM_001178096	F3		NM_032160	DSEL
NM_000067	CA2		NM_001993	F3		NM_000067	CA2
NM_000503	EYA1		NM_001042679	RHOC		NM_000503	EYA1
NM_000424	KRT5		NM_003385	VSNL1		NM_000424	KRT5
NM_017671	FERMT1		NM_198400	NEDD4		NM_017671	FERMT1
NM_001105206	LAMA4		NM_032812	PLXDC2		NM_001105206	LAMA4
NM_001105207	LAMA4		NM_004093	EFNB2		NM_001105207	LAMA4
NM_002290	LAMA4		NM_006403	NEDD9		NM_002290	LAMA4
NM_001127184	CFLAR		NM_033104	STON2		NM_001127184	CFLAR
NM_024913	CPED1		NM_004481	GALNT2		NM_024913	CPED1
NM_001003704	MTFP1		NM_001128826	NCS1		NM_001003704	MTFP1
NM_016498	MTFP1		NM_001143819	TPCN1		NM_016498	MTFP1
NM_018844	BCAP29		NM_017901	TPCN1		NM_018844	BCAP29
NM_003059	SLC22A4		NM_002032	FTH1		NM_003059	SLC22A4
NM_183049	TMSB4XP8		NM_001122819	KIF17		NM_183049	TMSB4XP8
NM_021109	TMSB4X		NM_020816	KIF17		NM_021109	TMSB4X
NM_001193493	SLC1A4		NM_183049	TMSB4XP8		NM_001193493	SLC1A4
NM_177401	MIDN		NM_003246	THBS1		NM_177401	MIDN
NM_000461	THRB		NM_021109	TMSB4X		NM_000461	THRB
NM_001128177	THRB		NM_007002	ADRM1		NM_001128177	THRB
NM_024954	UBTD1		NM_175573	ADRM1		NM_024954	UBTD1
NM_001171747	C3orf52		NM_004019	DMD		NM_001171747	C3orf52
NM_024616	C3orf52		NM_006763	BTG2		NM_024616	C3orf52
NM_000758	CSF2		NM_007350	PHLDA1		NM_000758	CSF2
NM_015976	SNX7		NM_015079	TBC1D2B		NM_015976	SNX7
NM_152238	SNX7		NM_144572	TBC1D2B		NM_152238	SNX7
NM_001025616	ARHGAP24		NM_001099751	SYBU		NM_001025616	ARHGAP24
NM_001943	DSG2		NM_001099752	SYBU		NM_001943	DSG2
NM_018177	N4BP2		NM_000557	GDF5		NM_018177	N4BP2
NM_004242	HMGN3		NM_001184717	TIPARP		NM_004242	HMGN3
NM_138730	HMGN3		NM_000240	MAOA		NM_138730	HMGN3
NM_004753	DHRS3		NM_001172656	ZFYVE28		NM_004753	DHRS3
NM_170754	TNS2		NM_020972	ZFYVE28		NM_170754	TNS2
NM_006963	ZNF22		NM_014890	FILIP1L		NM_006963	ZNF22
NM_004069	AP2S1		NM_001002857	ANXA2		NM_004069	AP2S1
NM_021575	AP2S1		NM_001002858	ANXA2		NM_021575	AP2S1
NM_198488	FAM83H		NM_001136015	ANXA2		NM_198488	FAM83H
NM_001432	EREG		NM_004039	ANXA2		NM_001432	EREG
NM_024876	COQ8B		NM_001012981	ZKSCAN2		NM_024876	COQ8B
NM_014164	FXYD5		NM_018916	PCDHGA3		NM_014164	FXYD5
NM_000963	PTGS2		NM_001135700	YWHAZ		NM_000963	PTGS2
NM_001025160	ADGRE5		NM_001135701	YWHAZ		NM_001025160	ADGRE5
NM_001784	ADGRE5		NM_002128	HMGB1		NM_001784	ADGRE5
NM_078481	ADGRE5		NM_152545	RASGEF1B		NM_078481	ADGRE5
NM_001162422	ETS1		NM_003629	PIK3R3		NM_001162422	ETS1
NM_005238	ETS1		NM_001040708	HEY1		NM_005238	ETS1
NM_001142477	NREP		NM_012258	HEY1		NM_001142477	NREP
NM_014033	METTL7A		NM_002970	SAT1		NM_014033	METTL7A
NM_004105	EFEMP1		NM_000418	IL4R		NM_004105	EFEMP1
NM_153026	PRICKLE1		NM_001168344	RREB1		NM_153026	PRICKLE1
NM_001191013	GSTO2		NM_201283	EGFR		NM_001191013	GSTO2
NM_183239	GSTO2		NM_203434	IER5L		NM_183239	GSTO2
NM_001236	CBR3		NM_002862	PYGB		NM_001236	CBR3
NM_020311	ACKR3		NM_000694	ALDH3B1		NM_020311	ACKR3
NM_001628	AKR1B1		NM_001030010	ALDH3B1		NM_001628	AKR1B1
NM_001562	IL18		NM_005251	FOXC2		NM_001562	IL18
NM_018071	ARHGEF40		NM_001079526	IKZF2		NM_018071	ARHGEF40
NM_001987	ETV6		NM_001035534	FAM129B		NM_001987	ETV6
NM_181553	CMTM3		NM_201284	EGFR		NM_181553	CMTM3
NM_020200	PRTFDC1		NM_152400	FAM241A		NM_020200	PRTFDC1
NM_002228	JUN		NM_001145306	CDK6		NM_002228	JUN
NM_001193570	CSRP1		NM_018067	MAP7D1		NM_001193570	CSRP1
NM_004078	CSRP1		NM_004755	RPS6KA5		NM_004078	CSRP1
NM_001193389	UNKL		NM_001105192	TLE3		NM_001193389	UNKL
NM_023076	UNKL		NM_005078	TLE3		NM_023076	UNKL
NM_001130677	EPOP		NM_020908	TLE3		NM_001130677	EPOP
NM_021724	NR1D1		NM_002237	KCNG1		NM_021724	NR1D1
NM_000176	NR3C1		NM_001814	CTSC		NM_000176	NR3C1
NM_001020825	NR3C1		NM_019094	NUDT4		NM_001020825	NR3C1
NM_001024094	NR3C1		NM_199040	NUDT4		NM_001024094	NR3C1
NM_001190945	TRAF1		NM_002430	MN1		NM_001190945	TRAF1
NM_020639	RIPK4		NM_002392	MDM2		NM_020639	RIPK4
NM_006885	ZFHX3		NM_000381	MID1		NM_006885	ZFHX3
NM_005585	SMAD6		NM_033289	MID1		NM_005585	SMAD6
NM_021214	ABHD17C		NM_024590	ARSJ		NM_021214	ABHD17C
NM_007021	DEPP1		NM_052905	FMNL2		NM_007021	DEPP1
NM_004089	TSC22D3		NM_012193	FZD4		NM_004089	TSC22D3
NM_001164446	C6orf132		NM_201282	EGFR		NM_001164446	C6orf132
NM_005855	RAMP1		NM_024927	PLEKHH3		NM_005855	RAMP1
NM_001540	HSPB1		NM_002203	ITGA2		NM_001540	HSPB1
NM_001508	GPR39		NM_001002840	STAG3L1		NM_001508	GPR39
NM_001040023	SIRPA		NM_018991	STAG3L1		NM_001040023	SIRPA
NM_021961	TEAD1		NM_005560	LAMA5		NM_021961	TEAD1
NM_001114980	TP63		NM_004015	DMD		NM_001114980	TP63
NM_001114981	TP63		NM_004016	DMD		NM_001114981	TP63
NM_001114982	TP63		NM_004017	DMD		NM_001114982	TP63
NM_001165920	SERPINF2		NM_004018	DMD		NM_001165920	SERPINF2
NM_001130849	CAB39		NM_138803	CCDC148		NM_001130849	CAB39
NM_001130850	CAB39		NM_000503	EYA1		NM_001130850	CAB39
NM_019054	FAM35A		NM_206967	C16orf74		NM_019054	FAM35A
NM_001126	ADSS		NM_033010	PCBP4		NM_001126	ADSS
NM_002640	SERPINB8		NM_007223	GPR176		NM_002640	SERPINB8
NM_198833	SERPINB8		NM_170707	LMNA		NM_198833	SERPINB8
NM_001031848	SERPINB8		NM_170708	LMNA		NM_001031848	SERPINB8
NM_016192	TMEFF2		NM_030785	RSPH6A		NM_016192	TMEFF2
NM_001008222	ZDHHC9		NM_000901	NR3C2		NM_001008222	ZDHHC9
NM_004502	HOXB7		NM_001166104	NR3C2		NM_004502	HOXB7
NM_001174157	ZFAT		NM_001098537	PNPLA7		NM_001174157	ZFAT
NM_020863	ZFAT		NM_152286	PNPLA7		NM_020863	ZFAT
NM_018012	KIF26B		NM_005572	LMNA		NM_018012	KIF26B
NM_052966	FAM129A		NM_005539	INPP5A		NM_052966	FAM129A
NM_001080471	PEAR1		NM_003702	RGS20		NM_001080471	PEAR1
NM_014452	TNFRSF21		NM_001304	CPD		NM_014452	TNFRSF21
NM_001042422	SLC16A3		NM_001123385	BCOR		NM_001042422	SLC16A3
NM_001085471	FOXN3		NM_017745	BCOR		NM_001085471	FOXN3
NM_001037164	ARL4A		NM_014454	SESN1		NM_001037164	ARL4A
NM_212460	ARL4A		NM_001145304	IQCN		NM_212460	ARL4A
NM_013386	SLC25A24		NM_001145305	IQCN		NM_013386	SLC25A24
NM_012419	RGS17		NM_025249	IQCN		NM_012419	RGS17
NM_001025389	AMPD3		NM_001144757	SCG5		NM_001025389	AMPD3
NM_133639	RHOV		NM_003020	SCG5		NM_133639	RHOV
NM_005230	ELK3		NM_001163436	TBCK		NM_005230	ELK3
NM_144779	FXYD5		NM_172240	POC1B		NM_144779	FXYD5
NM_152470	RNF165		NM_014325	CORO1C		NM_152470	RNF165
NM_194255	SLC19A1		NM_000076	CDKN1C		NM_194255	SLC19A1
NM_170746	SELENOH		NM_001122630	CDKN1C		NM_170746	SELENOH
NM_017588	WDR5		NM_001122631	CDKN1C		NM_017588	WDR5
NM_001136493	MFSD2A		NM_002228	JUN		NM_001136493	MFSD2A
NM_032793	MFSD2A		NM_015078	MCF2L2		NM_032793	MFSD2A
NM_024945	RMI1		NM_001127453	GSDME		NM_024945	RMI1
NM_001134368	SLC6A6		NM_001195243	SMKR1		NM_001134368	SLC6A6
NM_001134367	SLC6A6		NM_183323	PAIP1		NM_001134367	SLC6A6
NM_003043	SLC6A6		NM_001142616	EHBP1		NM_003043	SLC6A6
NM_006868	RAB31		NM_015252	EHBP1		NM_006868	RAB31
NM_194318	B3GLCT		NM_004261	SELENOF		NM_194318	B3GLCT
NM_144702	LRRC71		NM_203341	SELENOF		NM_144702	LRRC71
NM_014568	GALNT5		NM_203394	E2F7		NM_014568	GALNT5
NM_001856	COL16A1		NM_001161625	NXNL2		NM_001856	COL16A1
NM_052819	CARD14		NM_023016	SOWAHC		NM_052819	CARD14
NM_000602	SERPINE1		NM_182398	RPS6KA5		NM_000602	SERPINE1
NM_001165413	SERPINE1		NM_001098784	FAM89B		NM_001165413	SERPINE1
NM_005438	FOSL1		NM_001098785	FAM89B		NM_005438	FOSL1
NM_001098213	HRH1		NM_152832	FAM89B		NM_001098213	HRH1
NM_201629	TJP2		NM_020791	TAOK1		NM_201629	TJP2
NM_001018016	MUC1		NM_130435	PTPRE		NM_001018016	MUC1
NM_001018017	MUC1		NM_002192	INHBA		NM_001018017	MUC1
NM_001044390	MUC1		NM_004762	CYTH1		NM_001044390	MUC1
NM_001044391	MUC1		NM_017456	CYTH1		NM_001044391	MUC1
NM_001044392	MUC1		NM_001130689	HMGB2		NM_001044392	MUC1
NM_001044393	MUC1		NM_014705	DOCK4		NM_001044393	MUC1
NM_002456	MUC1		NM_003872	NRP2		NM_002456	MUC1
NM_022566	TLNRD1		NM_201266	NRP2		NM_022566	TLNRD1
NM_001233	CAV2		NM_201279	NRP2		NM_001233	CAV2
NM_198212	CAV2		NM_002208	ITGAE		NM_198212	CAV2
NM_001924	GADD45A		NM_004370	COL12A1		NM_001924	GADD45A
NM_182757	RNF144B		NM_080645	COL12A1		NM_182757	RNF144B
NM_000576	IL1B		NM_007173	PRSS23		NM_000576	IL1B
NM_018306	TMEM40		NM_182663	RASSF5		NM_018306	TMEM40
NM_000557	GDF5		NM_182664	RASSF5		NM_000557	GDF5
NM_152307	TRMT61A		NM_000416	IFNGR1		NM_152307	TRMT61A
NM_001079843	CASZ1		NM_015490	SEC31B		NM_001079843	CASZ1
NM_017766	CASZ1		NM_198182	GRHL1		NM_017766	CASZ1
NM_176071	P2RY2		NM_001554	CYR61		NM_176071	P2RY2
NM_001164283	TRAF3IP2		NM_001166133	FRAS1		NM_001164283	TRAF3IP2
NM_001008699	IL4R		NM_000461	THRB		NM_001008699	IL4R
NM_000418	IL4R		NM_001128177	THRB		NM_000418	IL4R
NM_001005376	PLAUR		NM_001127454	GSDME		NM_001005376	PLAUR
NM_001005377	PLAUR		NM_004403	GSDME		NM_001005377	PLAUR
NM_002659	PLAUR		NM_001136540	APOL1		NM_002659	PLAUR
NM_005860	FSTL3		NM_001136541	APOL1		NM_005860	FSTL3
NM_001195220	ZNF783		NM_003661	APOL1		NM_001195220	ZNF783
NM_014873	LPGAT1		NM_145343	APOL1		NM_014873	LPGAT1
NM_001172309	NEXN		NM_147161	ACOT11		NM_001172309	NEXN
NM_144573	NEXN		NM_031476	CRISPLD2		NM_144573	NEXN
NM_002901	RCN1		NM_001098634	RBM47		NM_002901	RCN1
NM_138352	SAMD1		NM_004419	DUSP5		NM_138352	SAMD1
NM_001098634	RBM47		NM_001748	CAPN2		NM_001098634	RBM47
NM_138420	AHNAK2		NM_001185009	RNF4		NM_138420	AHNAK2
NM_001136537	BTBD19		NM_005746	NAMPT		NM_001136537	BTBD19
NM_001135911	PIK3IP1		NM_198964	PTHLH		NM_001135911	PIK3IP1
NM_052880	PIK3IP1		NM_001135920	RIC1		NM_052880	PIK3IP1
NM_014256	B3GNT3		NM_199169	PMEPA1		NM_014256	B3GNT3
NM_001184745	PPP1R3F		NM_199170	PMEPA1		NM_001184745	PPP1R3F
NM_033215	PPP1R3F		NM_016593	CYP39A1		NM_033215	PPP1R3F
NM_001136000	ABL2		NM_003255	TIMP2		NM_001136000	ABL2
NM_001168239	ABL2		NM_005228	EGFR		NM_001168239	ABL2
NM_005158	ABL2		NM_182966	NEDD9		NM_005158	ABL2
NM_025079	ZC3H12A		NM_052841	TSSK3		NM_025079	ZC3H12A
NM_001003940	BMF		NM_203365	RAPH1		NM_001003940	BMF
NM_080725	SRXN1		NM_002250	KCNN4		NM_080725	SRXN1
NM_006079	CITED2		NM_153377	LRIG3		NM_006079	CITED2
NM_003999	OSMR		NM_001081573	GAB3		NM_003999	OSMR
NM_001024845	SLC6A9		NM_080612	GAB3		NM_001024845	SLC6A9
NM_004870	MPDU1		NM_006165	NFRKB		NM_004870	MPDU1
NM_080650	DPH6		NM_002996	CX3CL1		NM_080650	DPH6
NM_001141972	DPH6		NM_001135032	EVA1A		NM_001141972	DPH6
NM_006147	IRF6		NM_024769	CLMP		NM_006147	IRF6
NM_173175	PTK2B		NM_007155	ZP3		NM_173175	PTK2B
NM_001159291	MICAL1		NM_213589	RAPH1		NM_001159291	MICAL1
NM_022765	MICAL1		NM_004073	PLK3		NM_022765	MICAL1
NM_201533	DGKZ		NM_006558	KHDRBS3		NM_201533	DGKZ
NM_001039210	ALG13		NM_030915	LBH		NM_001039210	ALG13
NM_001168385	ALG13		NM_174936	PCSK9		NM_001168385	ALG13
NM_018466	ALG13		NM_001127361	RNF19B		NM_018466	ALG13
NM_001099922	ALG13		NM_153341	RNF19B		NM_001099922	ALG13
NM_014572	LATS2		NM_015683	ARRDC2		NM_014572	LATS2
NM_052866	ADAMTSL1		NM_003816	ADAM9		NM_052866	ADAMTSL1
NM_001040272	ADAMTSL1		NM_031419	NFKBIZ		NM_001040272	ADAMTSL1
NM_015559	SETBP1		NM_018534	NRP2		NM_015559	SETBP1
NM_138620	DDX31		NM_201267	NRP2		NM_138620	DDX31
NM_022779	DDX31		NM_201559	FOXO3		NM_022779	DDX31
NM_001343	DAB2		NM_001134437	PHLDB2		NM_001343	DAB2
NM_002081	GPC1		NM_001007067	SDCBP		NM_002081	GPC1
NM_013352	DSE		NM_001007068	SDCBP		NM_013352	DSE
NM_016206	VGLL3		NM_001007069	SDCBP		NM_016206	VGLL3
NM_201444	DGKA		NM_001007070	SDCBP		NM_201444	DGKA
NM_201445	DGKA		NM_005625	SDCBP		NM_201445	DGKA
NM_201554	DGKA		NM_005737	ARL4C		NM_201554	DGKA
NM_001423	EMP1		NM_006589	FAM189B		NM_001423	EMP1
NM_138969	SDR16C5		NM_198264	FAM189B		NM_138969	SDR16C5
NM_001166049	ERCC1		NM_005194	CEBPB		NM_001166049	ERCC1
NM_001983	ERCC1		NM_001145657	RAP1GAP		NM_001983	ERCC1
NM_153271	SNX33		NM_002885	RAP1GAP		NM_153271	SNX33
NM_173176	PTK2B		NM_001164440	ANKRD33B		NM_173176	PTK2B
NM_001190737	NFIB		NM_004148	NINJ1		NM_001190737	NFIB
NM_005596	NFIB		NM_002627	PFKP		NM_005596	NFIB
NM_005371	METTL1		NM_003711	PLPP1		NM_005371	METTL1
NM_023033	METTL1		NM_176895	PLPP1		NM_023033	METTL1
NM_005245	FAT1		NM_015194	MYO1D		NM_005245	FAT1
NM_002053	GBP1		NM_052819	CARD14		NM_002053	GBP1
NM_004494	HDGF		NM_177538	CYP20A1		NM_004494	HDGF
NM_015230	ARAP2		NM_153229	TMEM92		NM_015230	ARAP2
NM_001263	CDS1		NM_144965	TTC16		NM_001263	CDS1
NM_207348	SLC25A34		NM_001873	CPE		NM_207348	SLC25A34
NM_199069	NDUFAF3		NM_001109662	HECTD4		NM_199069	NDUFAF3
NM_199070	NDUFAF3		NM_001508	GPR39		NM_199070	NDUFAF3
NM_002822	TWF1		NM_004464	FGF5		NM_002822	TWF1
NM_001104548			NM_033143	FGF5		NM_001104548
NM_001170464	CDK17		NM_000213	ITGB4		NM_001170464	CDK17
NM_002595	CDK17		NM_001005731	ITGB4		NM_002595	CDK17
NM_006317	BASP1		NM_001008528	MXRA7		NM_006317	BASP1
NM_020992	PDLIM1		NM_001200	BMP2		NM_020992	PDLIM1
NM_001142805	SLC6A8		NM_015144	ZCCHC14		NM_001142805	SLC6A8
NM_005629	SLC6A8		NM_130807	MOB3A		NM_005629	SLC6A8
NM_000875	IGF1R		NM_003483	HMGA2		NM_000875	IGF1R
NM_021977	SLC22A3		NM_014314	DDX58		NM_021977	SLC22A3
NM_001029835	CCM2		NM_005907	MAN1A1		NM_001029835	CCM2
NM_002027	FNTA		NM_004169	SHMT1		NM_002027	FNTA
NM_001894	CSNK1E		NM_148918	SHMT1		NM_001894	CSNK1E
NM_001098531	RAPGEF3		NM_001008529	MXRA7		NM_001098531	RAPGEF3
NM_005308	GRK5		NM_198530	MXRA7		NM_005308	GRK5
NM_014508	APOBEC3C					NM_014508	APOBEC3C
NM_001173523	PCDH7					NM_001173523	PCDH7
NM_032457	PCDH7					NM_032457	PCDH7
NM_002589	PCDH7					NM_002589	PCDH7
NM_032456	PCDH7					NM_032456	PCDH7
NM_152503	MROH8					NM_152503	MROH8
NM_213631	MROH8					NM_213631	MROH8
NM_213632	MROH8					NM_213632	MROH8
NM_001076674	TMUB2					NM_001076674	TMUB2
NM_024107	TMUB2					NM_024107	TMUB2
NM_003713	PLPP3					NM_003713	PLPP3
NM_178865	SERINC2					NM_178865	SERINC2
NM_001127621	GALE					NM_001127621	GALE
NM_198270	NHS					NM_198270	NHS
NM_001128303	LACC1					NM_001128303	LACC1
NM_016932	SIX2					NM_016932	SIX2
NM_031942	CDCA7					NM_031942	CDCA7
NM_145810	CDCA7					NM_145810	CDCA7
NM_001401	LPAR1					NM_001401	LPAR1
NM_057159	LPAR1					NM_057159	LPAR1
NM_005257	GATA6					NM_005257	GATA6
NM_001109	ADAM8					NM_001109	ADAM8
NM_001164489	ADAM8					NM_001164489	ADAM8
NM_001164490	ADAM8					NM_001164490	ADAM8
NM_001143688	DIS3L					NM_001143688	DIS3L
NM_002006	FGF2					NM_002006	FGF2
NM_021732	AVPI1					NM_021732	AVPI1
NM_014142	NUDT5					NM_014142	NUDT5
NM_003223	TFAP4					NM_003223	TFAP4
NM_001257	CDH13					NM_001257	CDH13
NM_001025390	AMPD3					NM_001025390	AMPD3
NM_173653	SLC9A9					NM_173653	SLC9A9
NM_003702	RGS20					NM_003702	RGS20
NM_032427	MAML2					NM_032427	MAML2
NM_014751	MTSS1					NM_014751	MTSS1
NM_000158	GBE1					NM_000158	GBE1
NM_006710	COPS8					NM_006710	COPS8
NM_198189	COPS8					NM_198189	COPS8
NM_002160	TNC					NM_002160	TNC
NM_001085377	MCC					NM_001085377	MCC
NM_002017	FLI1					NM_002017	FLI1
NM_005401	PTPN14					NM_005401	PTPN14
NM_005195	CEBPD					NM_005195	CEBPD
NM_032407	PCDHGC5					NM_032407	PCDHGC5
NM_018929	PCDHGC5					NM_018929	PCDHGC5
NM_052954	CYYR1					NM_052954	CYYR1
NM_003844	TNFRSF10A					NM_003844	TNFRSF10A
NM_001082488	DHRS4L1					NM_001082488	DHRS4L1
NM_001142502	PPP1R13L					NM_001142502	PPP1R13L
NM_033512	TSPYL5					NM_033512	TSPYL5
NM_024702	ZNF750					NM_024702	ZNF750
NM_002612	PDK4					NM_002612	PDK4
NM_001127321	CBX5					NM_001127321	CBX5
NM_001126336	VCAN					NM_001126336	VCAN
NM_001164097	VCAN					NM_001164097	VCAN
NM_001164098	VCAN					NM_001164098	VCAN
NM_004385	VCAN					NM_004385	VCAN
NM_003842	TNFRSF10B					NM_003842	TNFRSF10B
NM_147187	TNFRSF10B					NM_147187	TNFRSF10B
NM_001113239	HIPK2					NM_001113239	HIPK2
NM_022740	HIPK2					NM_022740	HIPK2
NM_022763	FNDC3B					NM_022763	FNDC3B
NM_001221	CAMK2D					NM_001221	CAMK2D
NM_172127	CAMK2D					NM_172127	CAMK2D
NM_172128	CAMK2D					NM_172128	CAMK2D
NM_172114	CAMK2D					NM_172114	CAMK2D
NM_172115	CAMK2D					NM_172115	CAMK2D
NM_172129	CAMK2D					NM_172129	CAMK2D
NM_001098207	HNRNPF					NM_001098207	HNRNPF
NM_001353	AKR1C1					NM_001353	AKR1C1
NM_000585	IL15					NM_000585	IL15
NM_172174	IL15					NM_172174	IL15
NM_001161576	SAMD4A					NM_001161576	SAMD4A
NM_015589	SAMD4A					NM_015589	SAMD4A
NM_033452	TRIM47					NM_033452	TRIM47
NM_005524	HES1					NM_005524	HES1
NM_001134434	SPOCK2					NM_001134434	SPOCK2
NM_198565	NRROS					NM_198565	NRROS
NM_001128626	SPIRE1					NM_001128626	SPIRE1
NM_020148	SPIRE1					NM_020148	SPIRE1
NM_014767	SPOCK2					NM_014767	SPOCK2
NM_001033910	TRAF5					NM_001033910	TRAF5
NM_001166425	GNAI2					NM_001166425	GNAI2
NM_003264	TLR2					NM_003264	TLR2
NM_177525	MEST					NM_177525	MEST
NM_001004323	C7orf61					NM_001004323	C7orf61
NM_032304	HAGHL					NM_032304	HAGHL
NM_145690	YWHAZ					NM_145690	YWHAZ
NM_001033555	SPECC1					NM_001033555	SPECC1
NM_001033554	SPECC1					NM_001033554	SPECC1
NM_001130082	PLXNB1					NM_001130082	PLXNB1
NM_018315	FBXW7					NM_018315	FBXW7
NM_198082	CCDC57					NM_198082	CCDC57
NM_000099	CST3					NM_000099	CST3
NM_203394	E2F7					NM_203394	E2F7
NM_022817	PER2					NM_022817	PER2
NM_199339	SPEM1					NM_199339	SPEM1
NM_001102454	ZNF219					NM_001102454	ZNF219
NM_001174093	ZEB1					NM_001174093	ZEB1
NM_001174095	ZEB1					NM_001174095	ZEB1
NM_001174096	ZEB1					NM_001174096	ZEB1
NM_030751	ZEB1					NM_030751	ZEB1
NM_001079863	DBI					NM_001079863	DBI
NM_004135	IDH3G					NM_004135	IDH3G
NM_174869	IDH3G					NM_174869	IDH3G
NM_001497	B4GALT1					NM_001497	B4GALT1
NM_003329	TXN					NM_003329	TXN
NM_005935	AFF1					NM_005935	AFF1
NM_001165412	NFKB1					NM_001165412	NFKB1
NM_003998	NFKB1					NM_003998	NFKB1
NM_001018078	FPGS					NM_001018078	FPGS
NM_001039550	DNAJB2					NM_001039550	DNAJB2
NM_006736	DNAJB2					NM_006736	DNAJB2
NM_001025234	TSPAN4					NM_001025234	TSPAN4
NM_178569	C5orf38					NM_178569	C5orf38
NM_016324	ZNF274					NM_016324	ZNF274
NM_016325	ZNF274					NM_016325	ZNF274
NM_133502	ZNF274					NM_133502	ZNF274
NM_175852	TXLNA					NM_175852	TXLNA
NM_000698	ALOX5					NM_000698	ALOX5
NM_001134380	TBC1D5					NM_001134380	TBC1D5
NM_020699	GATAD2B					NM_020699	GATAD2B
NM_020397	CAMK1D					NM_020397	CAMK1D
NM_153498	CAMK1D					NM_153498	CAMK1D
NM_006154	NEDD4					NM_006154	NEDD4
NM_001421	ELF4					NM_001421	ELF4
NM_000966	RARG					NM_000966	RARG
NM_001039141	TRIOBP					NM_001039141	TRIOBP
NM_001172218	SCMH1					NM_001172218	SCMH1
NM_001172219	SCMH1					NM_001172219	SCMH1
NM_001172220	SCMH1					NM_001172220	SCMH1
NM_012236	SCMH1					NM_012236	SCMH1
NM_014742	TM9SF4					NM_014742	TM9SF4
NM_001547	IFIT2					NM_001547	IFIT2
NM_001145160	TPM4					NM_001145160	TPM4
NM_001135770	PVR					NM_001135770	PVR
NM_001135768	PVR					NM_001135768	PVR
NM_001135769	PVR					NM_001135769	PVR
NM_006505	PVR					NM_006505	PVR
NM_002996	CX3CL1					NM_002996	CX3CL1
NM_015681	B9D1					NM_015681	B9D1
NM_001039667	ANGPTL4					NM_001039667	ANGPTL4
NM_139314	ANGPTL4					NM_139314	ANGPTL4
NM_001122	PLIN2					NM_001122	PLIN2
NM_001126240	TP73					NM_001126240	TP73
NM_001126241	TP73					NM_001126241	TP73
NM_001126242	TP73					NM_001126242	TP73
NM_000627	LTBP1					NM_000627	LTBP1
NM_001166264	LTBP1					NM_001166264	LTBP1
NM_001166265	LTBP1					NM_001166265	LTBP1
NM_001166266	LTBP1					NM_001166266	LTBP1
NM_006769	LMO4					NM_006769	LMO4
NM_018699	PRDM5					NM_018699	PRDM5
NM_001081560	DMPK					NM_001081560	DMPK
NM_001081562	DMPK					NM_001081562	DMPK
NM_004409	DMPK					NM_004409	DMPK
NM_152293	TADA2B					NM_152293	TADA2B
NM_017633	FAM46A					NM_017633	FAM46A
NM_001170536	ATAD3A					NM_001170536	ATAD3A
NM_022572	PNKD					NM_022572	PNKD
NM_001079524	PAICS					NM_001079524	PAICS
NM_001079525	PAICS					NM_001079525	PAICS
NM_152553	RNF217					NM_152553	RNF217
NM_032819	ZNF341					NM_032819	ZNF341
NM_001941	DSC3					NM_001941	DSC3
NM_024423	DSC3					NM_024423	DSC3
NM_021034	IFITM3					NM_021034	IFITM3
NM_001178078	STAT6					NM_001178078	STAT6
NM_001178080	STAT6					NM_001178080	STAT6
NM_001178081	STAT6					NM_001178081	STAT6
NM_003153	STAT6					NM_003153	STAT6
NM_001004320	AGMO					NM_001004320	AGMO
NM_015168	ZC3H4					NM_015168	ZC3H4
NM_030641	APOL6					NM_030641	APOL6
NM_001142569	INAVA					NM_001142569	INAVA
NM_153634	CPNE8					NM_153634	CPNE8
NM_000141	FGFR2					NM_000141	FGFR2
NM_001144917	FGFR2					NM_001144917	FGFR2
NM_001144918	FGFR2					NM_001144918	FGFR2
NM_022970	FGFR2					NM_022970	FGFR2
NM_001144919	FGFR2					NM_001144919	FGFR2
NM_001166392	TPBG					NM_001166392	TPBG
NM_138412	RDH13					NM_138412	RDH13
NM_001135241	AKR1C2					NM_001135241	AKR1C2
NM_001005340	GPNMB					NM_001005340	GPNMB
NM_002510	GPNMB					NM_002510	GPNMB
NM_018347	AP5S1					NM_018347	AP5S1
NM_012280	FTSJ1					NM_012280	FTSJ1
NM_177439	FTSJ1					NM_177439	FTSJ1
NM_014331	SLC7A11					NM_014331	SLC7A11
NM_015597	GPSM1					NM_015597	GPSM1
NM_001145638	GPSM1					NM_001145638	GPSM1
NM_138444	KCTD12					NM_138444	KCTD12
NM_001145373	OTUD1					NM_001145373	OTUD1
NM_003712	PLPP2					NM_003712	PLPP2
NM_177526	PLPP2					NM_177526	PLPP2
NM_001098816	TENM4					NM_001098816	TENM4
NM_002090	CXCL3					NM_002090	CXCL3
NM_017439	GSAP					NM_017439	GSAP
NM_022154	SLC39A8					NM_022154	SLC39A8
NM_020210	SEMA4B					NM_020210	SEMA4B
NM_001142806	SLC6A8					NM_001142806	SLC6A8
NM_004181	UCHL1					NM_004181	UCHL1
NM_053056	CCND1					NM_053056	CCND1
NM_024540	MRPL24					NM_024540	MRPL24
NM_145729	MRPL24					NM_145729	MRPL24
NM_000299	PKP1					NM_000299	PKP1
NM_001005337	PKP1					NM_001005337	PKP1
NM_006303	AIMP2					NM_006303	AIMP2
NM_001136530	SERPINE2					NM_001136530	SERPINE2
NM_033386	MICALL1					NM_033386	MICALL1
NM_001002836	ZNF787					NM_001002836	ZNF787
NM_001106	ACVR2B					NM_001106	ACVR2B
NM_005493	RANBP9					NM_005493	RANBP9
NM_001166215	S1PR5					NM_001166215	S1PR5
NM_001124	ADM					NM_001124	ADM
NM_012099	CD3EAP					NM_012099	CD3EAP
NM_000527	LDLR					NM_000527	LDLR
NM_006368	CREB3					NM_006368	CREB3
NM_013254	TBK1					NM_013254	TBK1
NM_006169	NNMT					NM_006169	NNMT
NM_006152	LRMP					NM_006152	LRMP
NM_014729	TOX					NM_014729	TOX
NM_014836	RHOBTB1					NM_014836	RHOBTB1
NM_012301	MAGI2					NM_012301	MAGI2
NM_001161009	ARMC10					NM_001161009	ARMC10
NM_001161010	ARMC10					NM_001161010	ARMC10
NM_001161011	ARMC10					NM_001161011	ARMC10
NM_001161012	ARMC10					NM_001161012	ARMC10
NM_001161013	ARMC10					NM_001161013	ARMC10
NM_031905	ARMC10					NM_031905	ARMC10
NM_001142523	IRAK3					NM_001142523	IRAK3
NM_007199	IRAK3					NM_007199	IRAK3
NM_001002843	ZNF280D					NM_001002843	ZNF280D
NM_017661	ZNF280D					NM_017661	ZNF280D
NM_001002844	ZNF280D					NM_001002844	ZNF280D
NM_001105	ACVR1					NM_001105	ACVR1
NM_032836	FIZ1					NM_032836	FIZ1
NM_006663	PPP1R13L					NM_006663	PPP1R13L
NM_147189	FAM110B					NM_147189	FAM110B
NM_016612	SLC25A37					NM_016612	SLC25A37
NM_014395	DAPP1					NM_014395	DAPP1
NM_004104	FASN					NM_004104	FASN
NM_138378	FDXACB1					NM_138378	FDXACB1
NM_018211	RAVER2					NM_018211	RAVER2
NM_003302	TRIP6					NM_003302	TRIP6
NM_201378	PLEC					NM_201378	PLEC
NM_007172	NUP50					NM_007172	NUP50
NM_001164000	MECOM					NM_001164000	MECOM
NM_001127322	CBX5					NM_001127322	CBX5
NM_025195	TRIB1					NM_025195	TRIB1
NM_032772	ZNF503					NM_032772	ZNF503
NM_001173990	TMEM216					NM_001173990	TMEM216
NM_001173991	TMEM216					NM_001173991	TMEM216
NM_001131026	PEX5					NM_001131026	PEX5
NM_002616	PER1					NM_002616	PER1
NM_001130967	ZNF385A					NM_001130967	ZNF385A
NM_001130968	ZNF385A					NM_001130968	ZNF385A
NM_001018000	KAZN					NM_001018000	KAZN
NM_001185058	NOL3					NM_001185058	NOL3
NM_000551	VHL					NM_000551	VHL
NM_198156	VHL					NM_198156	VHL
NM_198531	ATP9B					NM_198531	ATP9B
NM_171982	TRIM35					NM_171982	TRIM35
NM_001042678	RHOC					NM_001042678	RHOC
NM_175744	RHOC					NM_175744	RHOC
NM_006903	PPA2					NM_006903	PPA2
NM_176866	PPA2					NM_176866	PPA2
NM_176867	PPA2					NM_176867	PPA2
NM_176869	PPA2					NM_176869	PPA2
NM_006407	ARL6IP5					NM_006407	ARL6IP5
NM_001012631	IL32					NM_001012631	IL32
NM_001012633	IL32					NM_001012633	IL32
NM_001012718	IL32					NM_001012718	IL32
NM_004221	IL32					NM_004221	IL32
NM_005445	SMC3					NM_005445	SMC3
NM_178313	SPTBN1					NM_178313	SPTBN1
NM_018590	CSGALNACT2					NM_018590	CSGALNACT2
NM_004991	MECOM					NM_004991	MECOM
NM_031412	GABARAPL1					NM_031412	GABARAPL1
NM_001130966	TBXAS1					NM_001130966	TBXAS1
NM_001166254	TBXAS1					NM_001166254	TBXAS1
NM_001042351	G6PD					NM_001042351	G6PD
NM_020947	TLDC1					NM_020947	TLDC1
NM_018153	ANTXR1					NM_018153	ANTXR1
NM_053034	ANTXR1					NM_053034	ANTXR1
NM_032208	ANTXR1					NM_032208	ANTXR1
NM_002852	PTX3					NM_002852	PTX3
NM_001134222	IRX2					NM_001134222	IRX2
NM_033267	IRX2					NM_033267	IRX2
NM_001012301	ARSI					NM_001012301	ARSI
NM_152419	HGSNAT					NM_152419	HGSNAT
NM_006401	ANP32B					NM_006401	ANP32B
NM_012394	PFDN2					NM_012394	PFDN2
NM_001145722	HOMER3					NM_001145722	HOMER3
NM_001012759	CTU2					NM_001012759	CTU2
NM_001012762	CTU2					NM_001012762	CTU2
NM_001216	CA9					NM_001216	CA9
NM_006379	SEMA3C					NM_006379	SEMA3C
NM_012330	KAT6B					NM_012330	KAT6B
NM_001428	ENO1					NM_001428	ENO1
NM_004458	ACSL4					NM_004458	ACSL4
NM_022977	ACSL4					NM_022977	ACSL4
NM_006622	PLK2					NM_006622	PLK2
NM_145290	ADGRA3					NM_145290	ADGRA3
NM_032525	TUBB6					NM_032525	TUBB6
NM_001166426	WDR13					NM_001166426	WDR13
NM_019035	PCDH18					NM_019035	PCDH18
NM_002317	LOX					NM_002317	LOX
NM_007287	MME
NM_017617	NOTCH1
NM_003034	ST8SIA1
NM_018676	THSD1
NM_199263	THSD1
NM_001748	CAPN2
NM_001897	CSPG4
NM_019593	GPCPD1
NM_152910	DGKH
NM_178009	DGKH
NM_001080479	ARHGEF28
NM_001177693	ARHGEF28
NM_001144822	CD58
NM_001779	CD58
NM_001145522	RAI14
NM_015577	RAI14
NM_001145097	SKIL
NM_001543	NDST1
NM_145715	TIGD2
NM_001101672	ZNF219
NM_003311	PHLDA2
NM_001139498	FGF13
NM_001139500	FGF13
NM_001139501	FGF13
NM_012293	PXDN
NM_001001794	DENND6B
NM_018009	TAPBPL
NM_052867	NALCN
NM_004395	DBN1
NM_145305	SLC25A43
NM_001184823	VDAC2
NM_001130709	RUFY3
NM_001135674	SMIM19
NM_000775	CYP2J2
NM_001126339	THTPA
NM_024328	THTPA
NM_015483	KBTBD2
NM_001024218	GPHN
NM_020806	GPHN
NM_032287	RTL6
NM_001137602	MEMO1
NM_015955	MEMO1
NM_032471	PKIB
NM_181795	PKIB
NM_174926	TMEM136
NM_003731	SSNA1
NM_080911	UNG
NM_002145	HOXB2
NM_001145408	NONO
NM_001145409	NONO
NM_001145410	NONO
NM_007363	NONO
NM_006743	RBM3
NM_001171083	SMPD4
NM_017751	SMPD4
NM_017951	SMPD4
NM_001015045	FAM13A
NM_002563	P2RY1
NM_005261	GEM
NM_181702	GEM
NM_006029	PNMA1
NM_002253	KDR
NM_005655	KLF10
NM_198516	GALNT18
NM_005126	NR1D2
NM_213618	ST5
NM_005966	NAB1
NM_015550	OSBPL3
NM_145320	OSBPL3
NM_145321	OSBPL3
NM_145322	OSBPL3
NM_003749	IRS2
NM_004428	EFNA1
NM_182685	EFNA1
NM_000213	ITGB4
NM_001005731	ITGB4
NM_001178056	PARP8
NM_024615	PARP8
NM_000581	GPX1
NM_201397	GPX1
NM_178422	PAQR7
NM_145185	MAP2K7
NM_001444	FABP5
NM_020762	SRGAP1
NM_198282	TMEM173
NM_001135147	SLC39A8
NM_018352	TMA16
NM_001425	EMP3
NM_001100818	PID1
NM_017933	PID1
NM_001191	BCL2L1
NM_138578	BCL2L1
NM_001225	CASP4
NM_001135032	EVA1A
NM_199440	HSPD1
NM_002273	KRT8
NM_001033056	GLUL
NM_153835	ADGRF3
NM_001190415	TAF6
NM_024758	AGMAT
NM_001165960	ALOXE3
NM_005952	MT1X
NM_016653	MAP3K20
NM_133646	MAP3K20
NM_001042467	MLPH
NM_024101	MLPH
NM_004160	PYY
NM_001168355	OSMR
NM_001150	ANPEP
NM_133376	ITGB1
NM_144975	SLFN5
NM_001002796	MCTP1
NM_000902	MME
NM_001164281	TRAF3IP2
NM_147686	TRAF3IP2
NM_152573	RASEF
NM_004585	RARRES3
NM_001191060	SLC25A22
NM_001127214	ACSF3
NM_174917	ACSF3
NM_017760	NCAPG2
NM_182850	CREM
NM_182853	CREM
NM_183013	CREM
NM_001881	CREM
NM_001098621	TMEM251
NM_001130964	PLCD1
NM_021199	SQOR
NM_001012961	SZT2
NM_013230	CD24
NM_002705	PPL
NM_001136017	CCND3
NM_001136126	CCND3
NM_006494	ERF
NM_001932	MPP3
NM_001145114	RRP12
NM_015179	RRP12
NM_001010972	ZYX
NM_003461	ZYX
NM_001893	CSNK1D
NM_139062	CSNK1D
NM_001146335	SLC6A15
NM_182767	SLC6A15
NM_018057	SLC6A15
NM_007026	DUSP14
NM_173469	UBE2Q2
NM_001015880	PAPSS2
NM_004670	PAPSS2
NM_001217	CA11
NM_001185039	ACOX1
NM_004035	ACOX1
NM_007292	ACOX1
NM_002309	LIF
NM_022802	CTBP2
NM_021623	PLEKHA2
NM_144710	2021-09-10
NM_178584	2021-09-10
NM_003599	SUPT3H
NM_015407	ABHD14A
NM_004939	DDX1
NM_001114331	CLCN7
NM_001287	CLCN7
NM_006051	APBB3
NM_133172	APBB3
NM_133173	APBB3
NM_133174	APBB3
NM_000107	DDB2
NM_002912	REV3L
NM_002977	SCN9A
NM_001017368	RFFL
NM_005740	DNAL4
NM_173216	ST6GAL1
NM_173217	ST6GAL1
NM_032812	PLXDC2
NM_003262	SEC62
NM_001098790	MID1IP1
NM_001098791	MID1IP1
NM_005310	GRB7
NM_001092	ABR
NM_001113755	TYMP
NM_001953	TYMP
NM_052862	RCSD1
NM_000408	GPD2
NM_000445	PLEC
NM_005009	NME4
NM_001127696	ATXN3
NM_001127697	ATXN3
NM_001164774	ATXN3
NM_001164776	ATXN3
NM_001164777	ATXN3
NM_001164778	ATXN3
NM_001164779	ATXN3
NM_001164780	ATXN3
NM_001164781	ATXN3
NM_001164782	ATXN3
NM_004993	ATXN3
NM_030660	ATXN3
NM_177924	ASAH1
NM_016138	COQ7
NM_020126	SPHK2
NM_007167	ZMYM6
NM_003619	PRSS12
NM_001160184	PLEKHN1
NM_032129	PLEKHN1
NM_018696	ELAC1
NM_003074	SMARCC1
NM_001164756	ASPH
NM_001164754	ASPH
NM_001164755	ASPH
NM_032466	ASPH
NM_004318	ASPH
NM_203434	IER5L
NM_001166271	SPATA13
NM_153023	SPATA13
NM_018718	CEP41
NM_152330	FRMD6
NM_001040194	AGTRAP
NM_001040195	AGTRAP
NM_001040196	AGTRAP
NM_001040197	AGTRAP
NM_020350	AGTRAP
NM_198154	TMEM95
NM_014595	NT5C
NM_001100426	RAP1GDS1
NM_001100427	RAP1GDS1
NM_001100428	RAP1GDS1
NM_001100429	RAP1GDS1
NM_001100430	RAP1GDS1
NM_021159	RAP1GDS1
NM_006388	KAT5
NM_182709	KAT5
NM_182710	KAT5
NM_001134422	CDV3
NM_017548	CDV3
NM_015299	KHNYN
NM_002654	PKM
NM_182470	PKM
NM_182471	PKM
NM_002032	FTH1
NM_003246	THBS1
NM_001128309	TSPAN14
NM_030927	TSPAN14
NM_001080125	CASP8
NM_144683	DHRS13
NM_024738	C12orf49
NM_003374	VDAC1
NM_012408	ZMYND8
NM_183047	ZMYND8
NM_183048	ZMYND8
NM_000381	MID1
NM_033289	MID1
NM_001163446	CPA4
NM_016352	CPA4
NM_001001975	ATP5F1D
NM_001687	ATP5F1D
NM_014235	UBL4A
NM_014042	ANAPC15
NM_181573	RFC4
NM_006348	COG5
NM_181733	COG5
NM_001161520	COG5
NM_001102366	DGLUCY
NM_001102368	DGLUCY
NM_001102369	DGLUCY
NM_024952	DGLUCY
NM_138464	EXOC3-AS1
NM_020342	SLC39A10
NM_001145961	SLC12A4
NM_001145962	SLC12A4
NM_005072	SLC12A4
NM_001195071	TMEM184B
NM_001797	CDH11
NM_000245	MET
NM_001127500	MET
NM_012081	ELL2
NM_005914	MCM4
NM_182746	MCM4
NM_006572	GNA13
NM_178169	RASSF3
NM_001001481	UBE2W
NM_018299	UBE2W
NM_203415	ELP5
NM_001163	APBA1
NM_005797	MPZL2
NM_144765	MPZL2
NM_032186	ZNF644
NM_201269	ZNF644
NM_014734	SUSD6
NM_001102	ACTN1
NM_001130004	ACTN1
NM_001130005	ACTN1
NM_016234	ACSL5
NM_025181	SLC35F5
NM_006519	DYNLT1
NM_001135586	C5orf24
NM_001004065	AKAP2
NM_014899	RHOBTB3
NM_024329	EFHD2
NM_032341	DDI2
NM_001170750	SRPX
NM_001170751	SRPX
NM_001170752	SRPX
NM_006307	SRPX
NM_001005273	CHD3
NM_005852	CHD3
NM_007027	TOPBP1
NM_004040	RHOB
NM_002726	PREP
NM_002165	ID1
NM_181353	ID1
NM_015310	PSD3
NM_018986	SH3TC1
NM_001130145	YAP1
NM_001195044	YAP1
NM_006106	YAP1
NM_001014446	OCIAD2
NM_152398	OCIAD2
NM_012474	UCK2
NM_017519	ARID1B
NM_020732	ARID1B
NM_006041	HS3ST3B1
NM_003758	EIF3J
NM_001080419	UNK
NM_198557	RBM43
NM_003290	TPM4
NM_012401	PLXNB2
NM_004405	DLX2
NM_144570	JPT2
NM_001167672	LPP
NM_033271	BTBD6
NM_178006	STARD13
NM_001099455	CPPED1
NM_018340	CPPED1
NM_152313	SLC36A4
NM_012152	LPAR3
NM_001144966	NEDD4L
NM_004625	WNT7A
NM_001043318	ELMSAN1
NM_018370	DRAM1
NM_001042440	CAST
NM_032111	MRPL14
NM_206920	MAMDC4
NM_001098502	CHCHD4
NM_144636	CHCHD4
NM_177536	SULT1A1
NM_153638	PANK2
NM_017811	UBE2R2
NM_005919	BORCS8-MEF2B
NM_001145784	BORCS8
NM_001145783	BORCS8
NM_002512	NME2
NM_001145306	CDK6
NM_152230	IPMK
NM_002140	HNRNPK
NM_031262	HNRNPK
NM_152371	FAM213B
NM_001005920	JMJD8
NM_001723	DST
NM_015548	DST
NM_004510	SP110
NM_004509	SP110
NM_080424	SP110
NM_001099695	REPIN1
NM_001099696	REPIN1
NM_013400	REPIN1
NM_002547	OPHN1
NM_001080383	GJC1
NM_015229	CLUH
NM_003358	UGCG
NM_001184780	NOX5
NM_145658	SPESP1
NM_021185	CATSPERG
NM_006142	SFN
NM_001031617	COX19
NM_019012	PLEKHA5
NM_001143821	PLEKHA5
NM_001190860	PLEKHA5
NM_001012634	IL32
NM_001012632	IL32
NM_000837	GRINA
NM_001009184	GRINA
NM_006717	SPIN1
NM_001143958	TMEM30A
NM_018247	TMEM30A
NM_001008800	CCT3
NM_005998	CCT3
NM_001098206	HNRNPF
NM_002189	IL15RA
NM_172200	IL15RA
NM_006515	SETMAR
NM_001164721	PTAFR
NM_001164722	PTAFR
NM_007182	RASSF1
NM_170714	RASSF1
NM_017882	CLN6
NM_000291	PGK1
NM_033546	MYL12B
NM_001145721	HOMER3
NM_015180	SYNE2
NM_182914	SYNE2
NM_005957	MTHFR
NM_001128620	PAK1
NM_002576	PAK1
NM_138448	ACYP2
NM_017576	KIF27
NM_016134	CPQ
NM_002199	IRF2
NM_001129731	PLEKHG4
NM_001018057	DKK3
NM_001145138	RELA
NM_021975	RELA
NM_005597	NFIC
NM_001169110	SCO2
NM_015055	SWAP70
NM_002539	ODC1
NM_014045	LRP10
NM_001136215	ARTN
NM_057090	ARTN
NM_057091	ARTN
NM_014456	PDCD4
NM_145341	PDCD4
NM_024036	LRFN4
NM_177434
NM_001142624	RAB34
NM_001142625	RAB34
NM_001144943	RAB34
NM_020724	RNF150
NM_001010867	IBA57
NM_001160305	SETD6
NM_024860	SETD6
NM_000485	APRT
NM_001030018	APRT
NM_014294	TRAM1
NM_001129729	PLEKHG4
NM_001164440	ANKRD33B
NM_182487	OLFML2A
NM_001163673	WDR81
NM_152348	WDR81
NM_020532	RTN4
NM_153828	RTN4
NM_207520	RTN4
NM_002997	SDC1
NM_000574	CD55
NM_001114752	CD55
NM_000332	ATXN1
NM_001128164	ATXN1
NM_002740	PRKCI
NM_001008707	EML1
NM_004434	EML1
NM_000476	AK1
NM_002766	PRPSAP1
NM_022147	RTP4
NM_001114619	MGAT1
NM_001114620	MGAT1
NM_001170587	HHAT
NM_001170588	HHAT
NM_018194	HHAT
NM_014553	TFCP2L1
NM_203464	AK4
NM_017631	DDX60
NM_005526	HSF1
NM_152295	TARS
NM_003132	SRM
NM_001136497	BTF3L4
NM_152265	BTF3L4
NM_000076	CDKN1C
NM_001122630	CDKN1C
NM_001122631	CDKN1C
NM_001157	ANXA11
NM_145868	ANXA11
NM_145869	ANXA11
NM_144949	SOCS5
NM_017423	GALNT7
NM_194296	SPATA24
NM_003761	VAMP8
NM_014241	HACD1
NM_006018	HCAR3
NM_004090	DUSP3
NM_012101	TRIM29
NM_005909	MAP1B
NM_153695	ZNF367
NM_003636	KCNAB2
NM_172130	KCNAB2
NM_018109	MTPAP
NM_001018136	NME1-NME2
NM_000269	NME1
NM_198175	NME1
NM_001080452	GPR108
NM_001136159	OTUD5
NM_001113411	FGGY
NM_018291	FGGY
NM_021629	GNB4
NM_012068	ATF5
NM_006062	SMYD5
NM_024592	SRD5A3
NM_006080	SEMA3A
NM_001174125	SLC11A2
NM_013281	FLRT3
NM_198391	FLRT3
NM_003028	SHB
NM_001903	CTNNA1
NM_033251	RPL13
NM_001007267	PLA2R1
NM_001195641	PLA2R1
NM_007366	PLA2R1
NM_004811	LPXN
NM_032704	TUBA1C
NM_004096	EIF4EBP2
NM_004728	DDX21
NM_177551	HCAR2
NM_001001655	ALKBH2
NM_001145374	ALKBH2
NM_001145375	ALKBH2
NM_001135239	LDHA
NM_001165415	LDHA
NM_001165416	LDHA
NM_005566	LDHA
NM_014578	RHOD
NM_015140	TTLL12
NM_018584	CAMK2N1
NM_005293	GPR20
NM_017577	GRAMD1C
NM_001143973	TCTN3
NM_015631	TCTN3
NM_018393	TCP11L1
NM_032324	NTPCR
NM_006251	PRKAA1
NM_206907	PRKAA1
NM_005022	PFN1
NM_006279	ST3GAL3
NM_174963	ST3GAL3
NM_174964	ST3GAL3
NM_174965	ST3GAL3
NM_174966	ST3GAL3
NM_174967	ST3GAL3
NM_174968	ST3GAL3
NM_174969	ST3GAL3
NM_174970	ST3GAL3
NM_174971	ST3GAL3
NM_001042750	STAG2
NM_001042751	STAG2
NM_006603	STAG2
NM_001171508	MCFD2
NM_001171511	MCFD2
NM_021008	DEAF1
NM_032433	ZNF333
NM_000024	ADRB2
NM_002473	MYH9
NM_002387	MCC
NM_023931	ZNF747
NM_001033583	ACOT9
NM_001037171	ACOT9
NM_001042399	CEP83
NM_016122	CEP83
NM_025106	SPSB1
NM_005862	STAG1
NM_001018109	PIR
NM_003662	PIR
NM_030882	APOL2
NM_001018138	NME2
NM_001195001	PTPRU
NM_005704	PTPRU
NM_133177	PTPRU
NM_133178	PTPRU
NM_001111067	ACVR1
NM_001111077	EZR
NM_001135575	SMIM13
NM_001031703	ELP6
NM_007165	SF3A2
NM_000494	COL17A1
NM_001033117	SRGAP3
NM_014850	SRGAP3
NM_000064	C3
NM_001167822	BLCAP
NM_001170580	HHAT
NM_001017964	YDJC
NM_000228	LAMB3
NM_014601	EHD2
NM_014890	FILIP1L
NM_012190	ALDH1L1
NM_006247	PPP5C
NM_001166692	C11orf91
NM_004775	B4GALT6
NM_005251	FOXC2
NM_057179	TWIST2
NM_198988	LENG9
NM_003959	HIP1R
NM_006821	ACOT2
NM_004898	CLOCK
NM_212471	PRKAR1A
NM_001100623	PLEKHB2
NM_017958	PLEKHB2
NM_014168	METTL5
NM_000405	GM2A
NM_001167607	GM2A
NM_006825	CKAP4
NM_022361	POPDC3
NM_002697	POU2F1
NM_001839	CNN3
NM_004358	CDC25B
NM_021872	CDC25B
NM_021873	CDC25B
NM_002604	PDE7A
NM_004723	ARHGEF2
NM_018321	BRIX1
NM_001349	DARS
NM_001033053	NLRP1
NM_014922	NLRP1
NM_033004	NLRP1
NM_033006	NLRP1
NM_033007	NLRP1
NM_001083956	ZNF655
NM_138494	ZNF655
NM_001085366	ZNF655
NM_024061	ZNF655
NM_003422	MZF1
NM_198055	MZF1
NM_006836	GCN1
NM_001040425	U2AF1L4
NM_144987	U2AF1L4
NM_005628	SLC1A5
NM_001134398	VAV2
NM_003371	VAV2
NM_000094	COL7A1
NM_014214	IMPA2
NM_001135255	RBBP4
NM_005610	RBBP4
NM_044472	CDC42
NM_001039802	CDC42
NM_001791	CDC42
NM_002293	LAMC1
NM_001025604	ARRDC2
NM_032714	INF2
NM_001031714	INF2
NM_022489	INF2
NM_002872	RAC2
NM_006540	NCOA2
NM_004095	EIF4EBP1
NM_014688	USP6NL
NM_016108	AIG1
NM_006400	DCTN2
NM_015659	RSL1D1
NM_001177664	RIF1
NM_001177663	RIF1
NM_018151	RIF1
NM_004961	GABRE
NM_025182	FAM214B
NM_138495	ATXN7L1
NM_001142616	EHBP1
NM_015252	EHBP1
NM_032020	FUCA2
NM_005160	GRK3
NM_001033580	MYO19
NM_001163735	MYO19
NM_025109	MYO19
NM_001012	RPS8
NM_005749	TOB1
NM_001039848	GPX4
NM_001145443	PFKFB3
NM_001040177	AKR1E2
NM_014516	CNOT3
NM_001085486	SELENOP
NM_001093726	SELENOP
NM_005410	SELENOP
NM_018164	INTS13
NM_001145166	PRMT3
NM_001145167	PRMT3
NM_005788	PRMT3
NM_001025201	CHN1
NM_001822	CHN1
NM_000636	SOD2
NM_001024465	SOD2
NM_001024466	SOD2
NM_001099400	SGCE
NM_001099401	SGCE
NM_003919	SGCE
NM_001015048	BAG5
NM_198321	GALNT10
NM_001184965	WDR44
NM_001184966	WDR44
NM_019045	WDR44
NM_148977	PANK1
NM_001128212	WDSUB1
NM_001030006	AP2B1
NM_001282	AP2B1
NM_001078173	RTL8B
NM_003297	NR2C1
NM_001032287	NR2C1
NM_001127362	NR2C1
NM_004285	H6PD
NM_144974	CCDC122
NM_002615	SERPINF1
NM_005602	CLDN11
NM_001098523	HTATIP2
NM_017444	CHRAC1
NM_001009984	C20orf194
[truncated: 13,770 more rows]
