# Supplementary figures and images for: Promoter-specific changes in initiation, elongation, and homeostasis of histone H3 acetylation during CBP/p300 inhibition
Source: eLife journal article supplement (doi:10.7554/elife.63512), 2021-03-11

y-max:

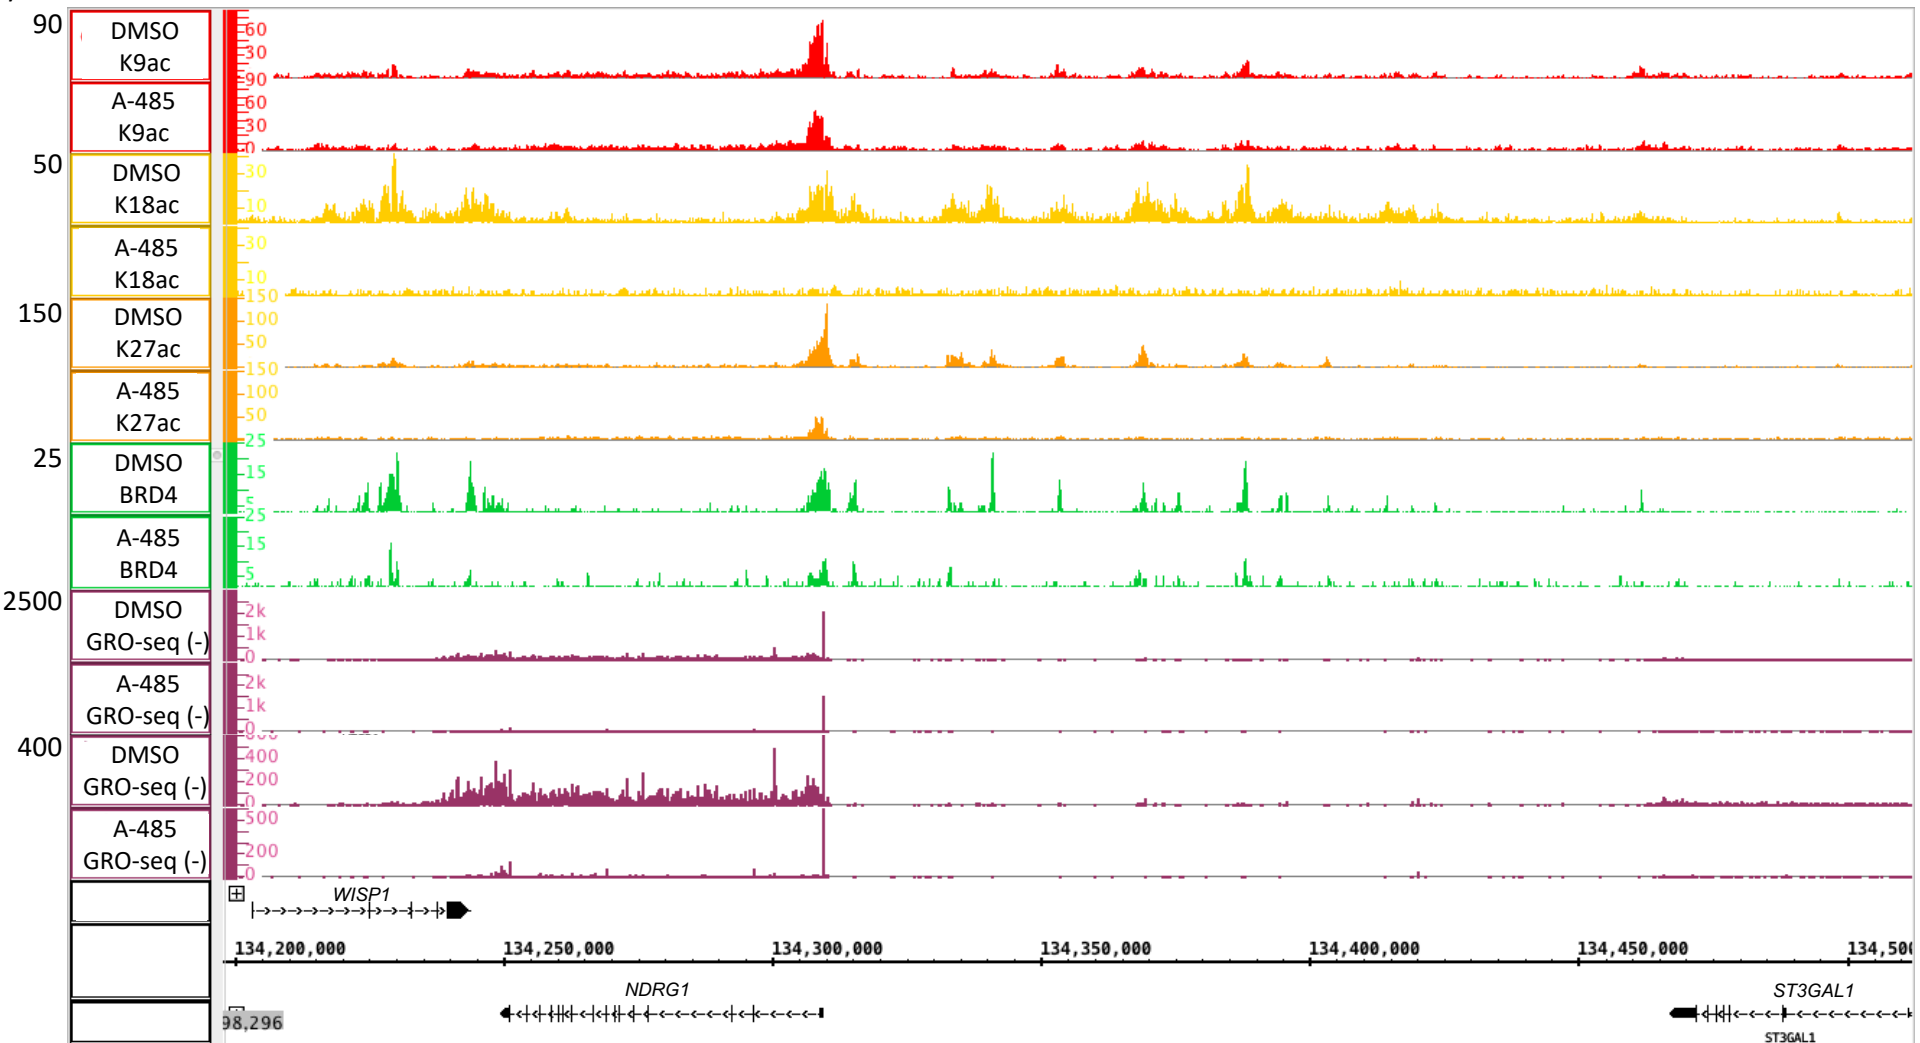

Supplement: supp [file elife-63512-supp-v1.zip]

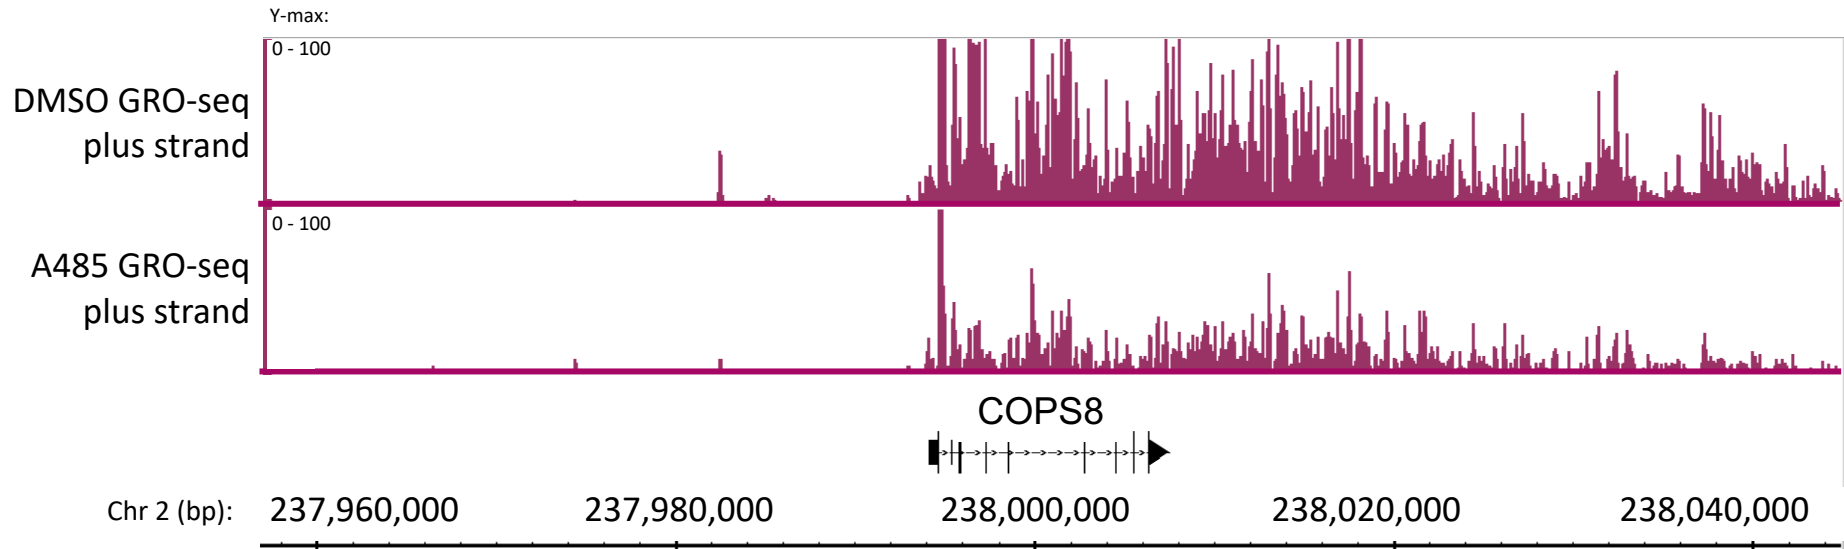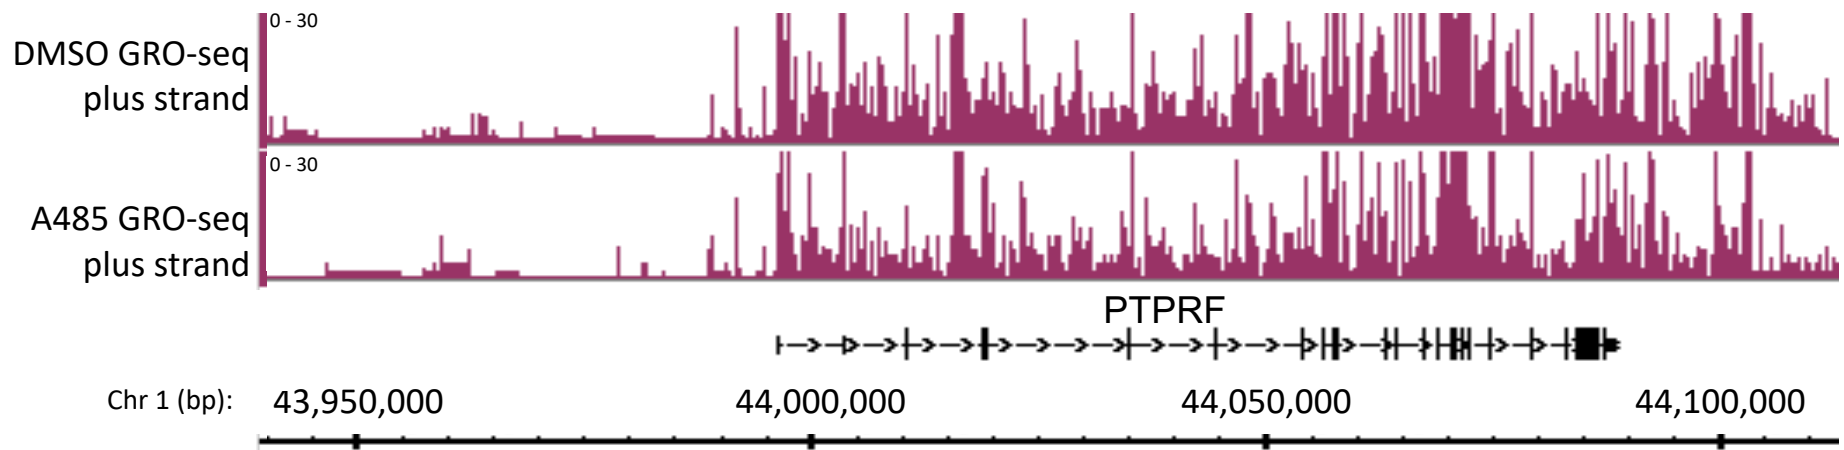

Supplement: supp [file elife-63512-supp-v1.zip]

a)

## AF9 Binding Meta-gene

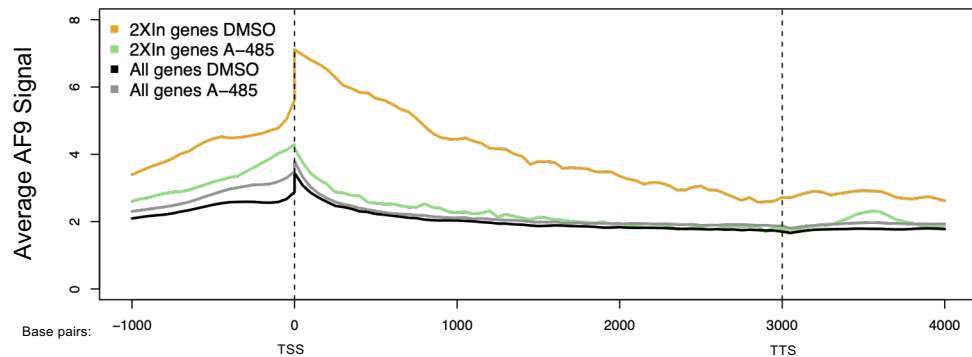

## ENL Binding Meta-gene

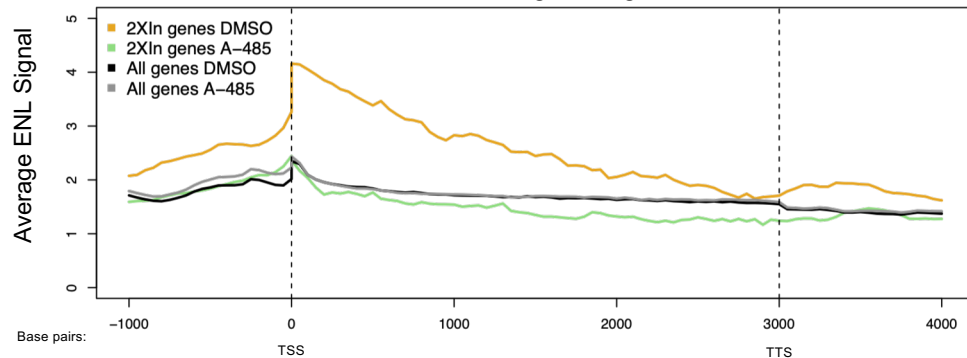

b)

## BRD4 near TSS of Active Genes

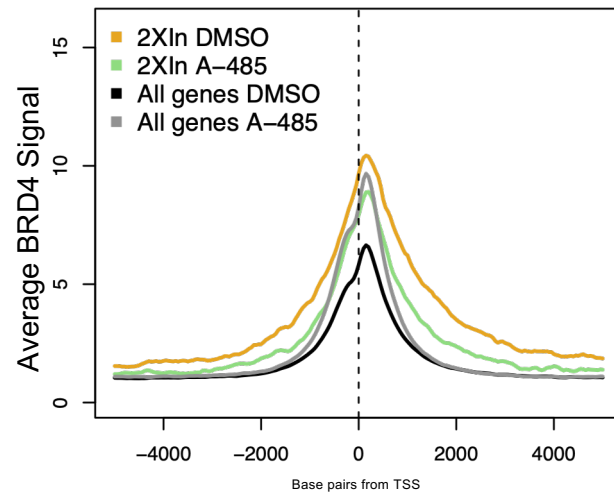

Supplement: supp [file elife-63512-supp-v1.zip]

y-max:

80

35

300

60

80

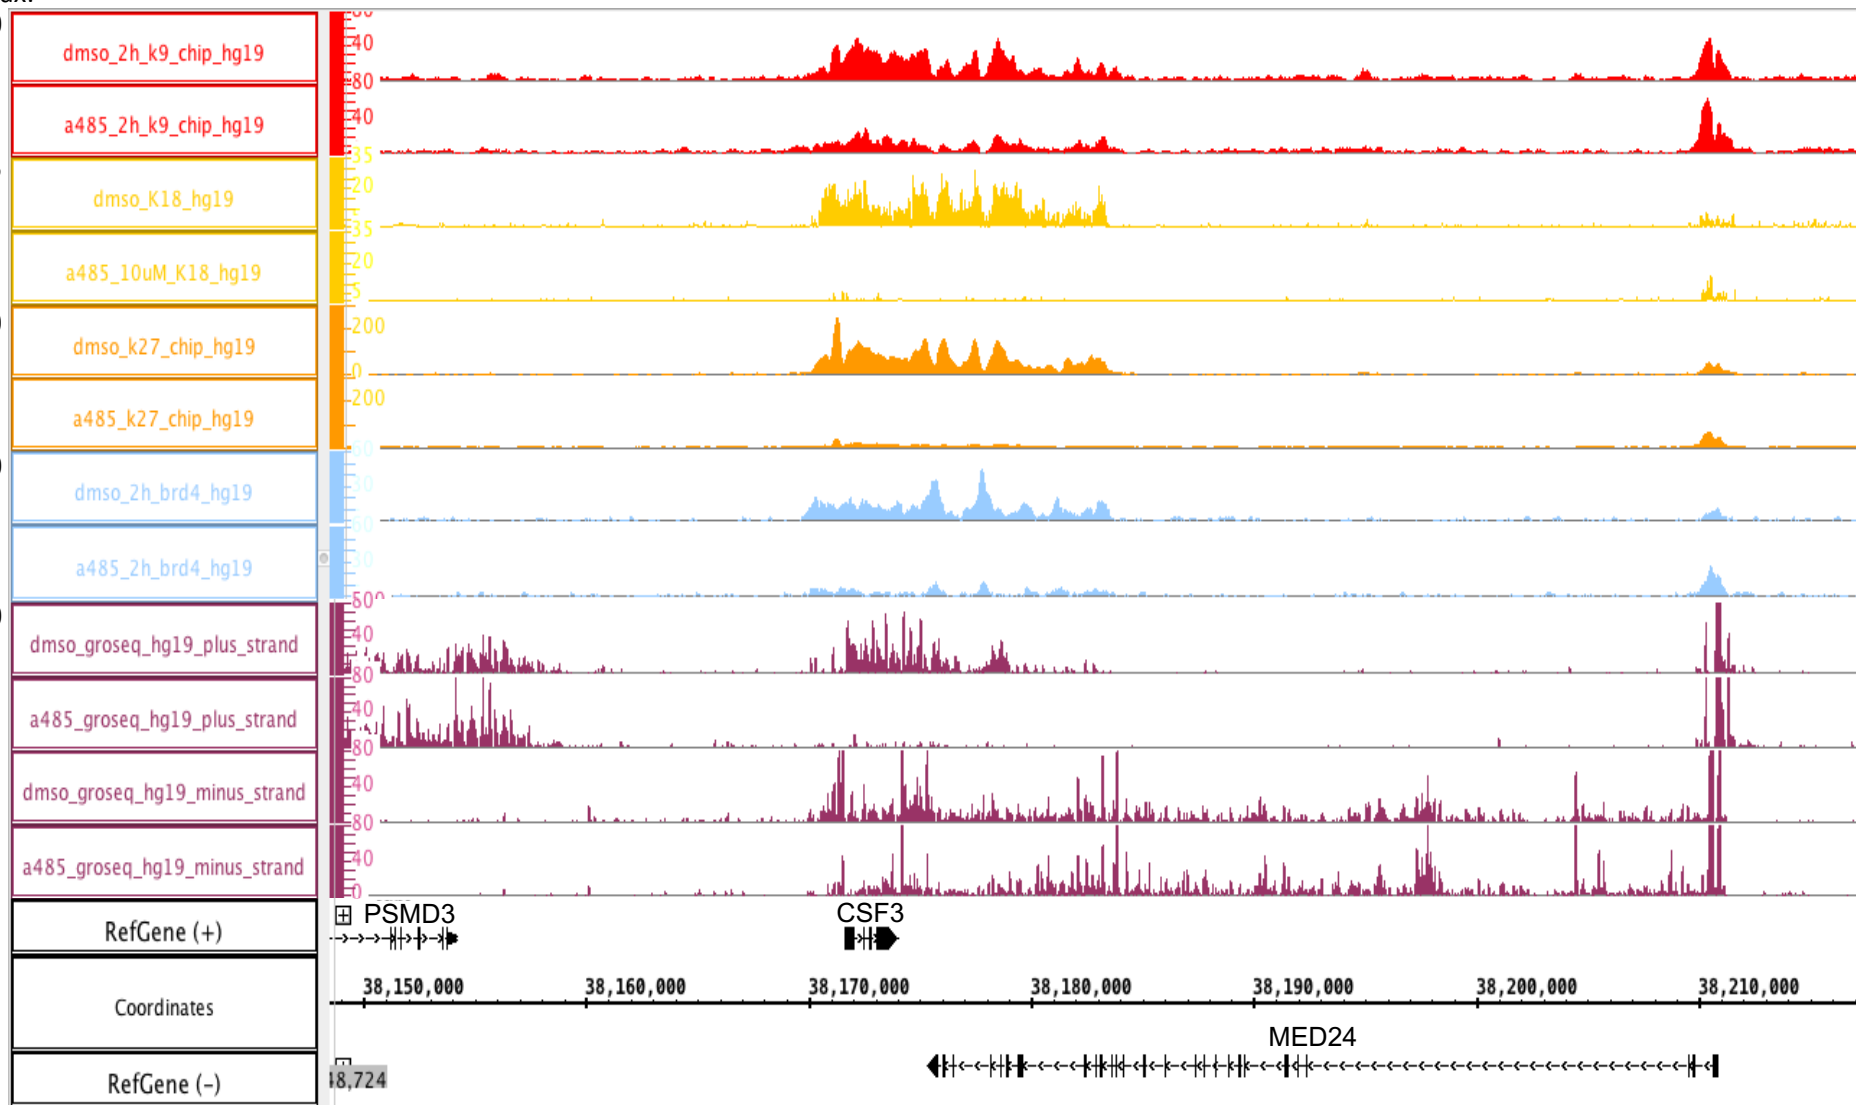

Supplement: supp [file elife-63512-supp-v1.zip]

y-max:

20

20

20

20

700

40

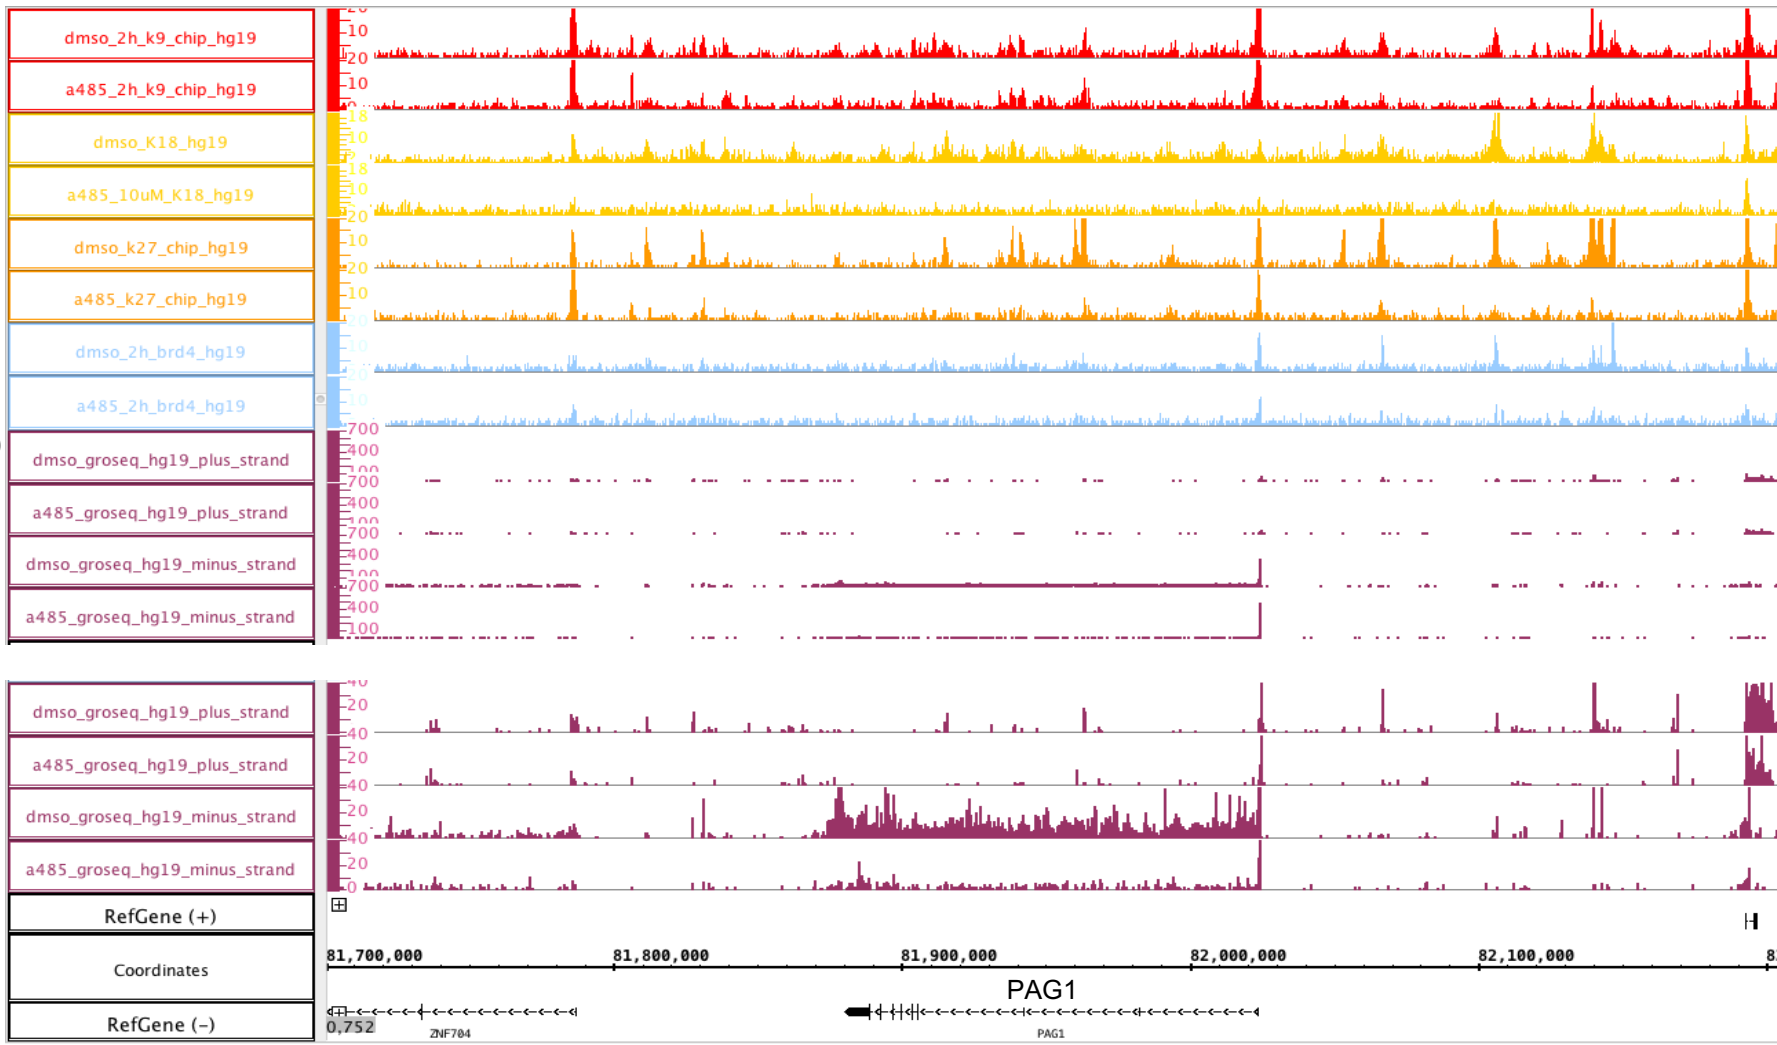

Supplement: supp [file elife-63512-supp-v1.zip]

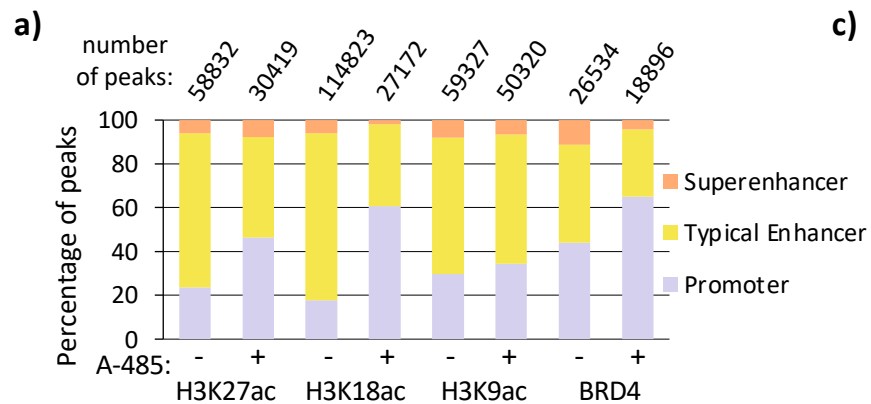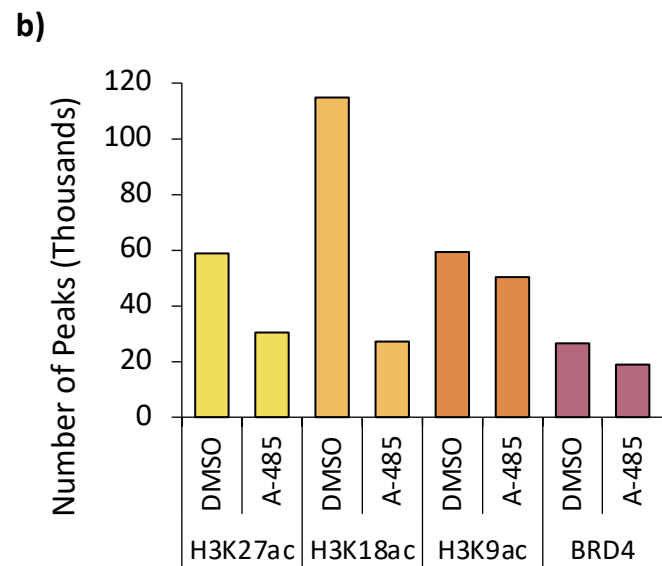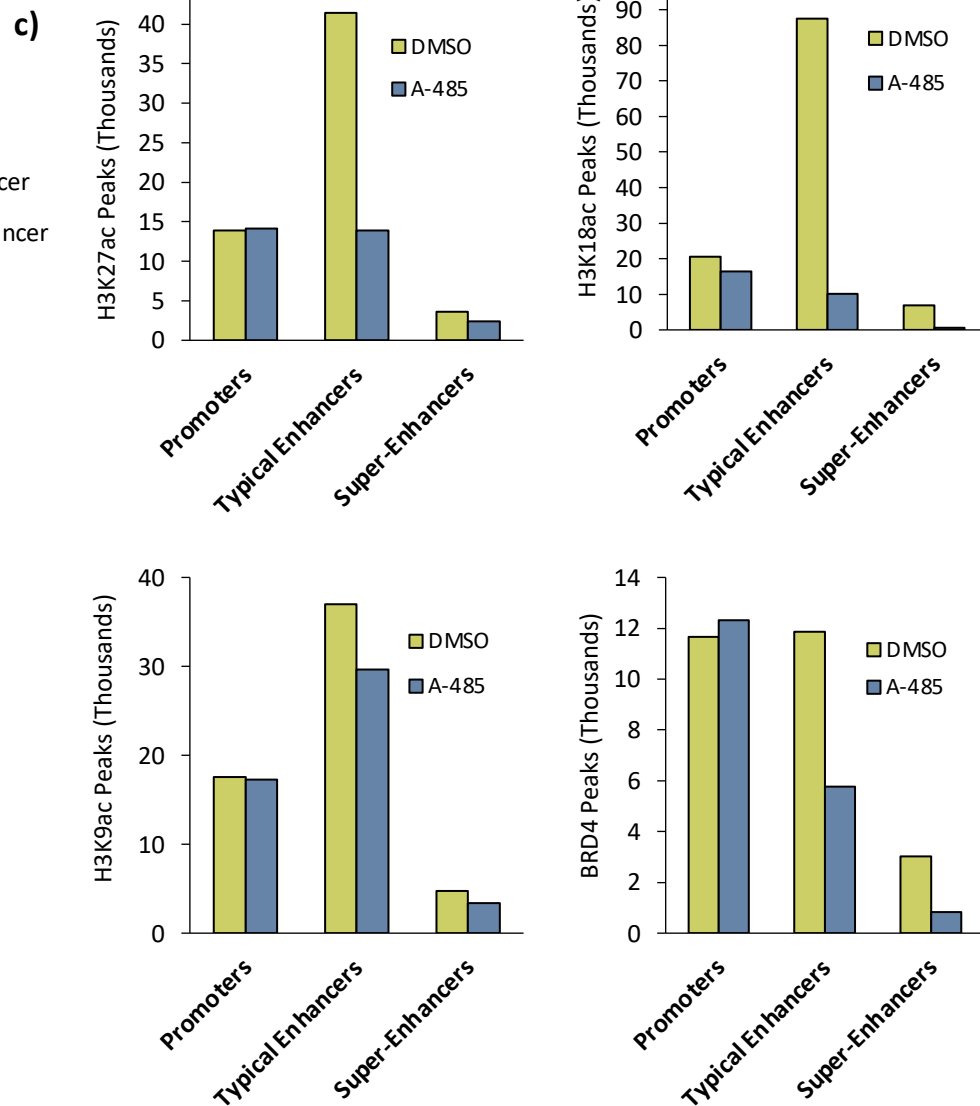

Supplement: supp [file elife-63512-supp-v1.zip]
